# Supplementary material for: Structural and immunological characterization of an epitope within the PAN motif of ectodomain I in Babesia bovis apical membrane antigen 1 for vaccine development
Source: PeerJ. 2021 Jul 16;9:e11765. doi: 10.7717/peerj.11765 (PMC8288113; doi:10.7717/peerj.11765)
Supplement: Supplemental Information 3 [file peerj-09-11765-s003.xlsx]

## Sheet: Bbipred
Bepipred Linear Epitope Prediction 2.0 Results
Input Sequences							NameSequence : BbAMA-1
1	MQLHYKMQST SPKYNYKRML CMVFVPVILS SFFAEDALAS NSTLFAFHRE PTNRRLTRRA						Epitopes : ...EEEEEEEEEEEEE.....................EEEEEEEEEEEEEEEEEEEEEEEEEEEEEEEEEEEEEEEEEEEEEEEEEEEEEEEEEEEEEEEEEEEEEEEEEEEE....EEEEEEEEEEEEEEEEEE..............EEEEEEEEEEEEEEEEEEEEEEEEEEEEEEEEEEEEEEEEEEEEEEEEEEEEEEEEEEEEEEEE..........EEEEEEEE.....................EEEEEEEEEEEEEEEEEE.........EEEEE..........EEEEEEEEEEEEEE.........EEEEEEEEEEEEEEEE.........EEEEEEEEEEEEEEEEEEEEEEEEEEEEEEE.......EEEEEEEE…
61	SRGQLLNSRR GSDDTSESSD RYSGRSGGSK NSGQSPWIKY MQKFDIPRNH GSGIYVDLGG						Predictions: MQLHYKMQSTSPKYNYKRMLCMVFVPVILSSFFAEDALASNSTLFAFHREPTNRRLTRRASRGQLLNSRRGSDDTSESSDRYSGRSGGSKNSGQSPWIKYMQKFDIPRNHGSGIYVDLGGYESVGSKSYRMPVGKCPVVGKIIDLGNGADFLDPISSEDPSYRGLAFPETAVDSNIPTQPKTRGSSSVTAAKLSPVSAKDLRRWGYEGNDVANCSEYASNLIPASDKTTKYRYPFVFDSDNQMCYILYSAIQYNQGSRYCDNDGSSEEGTSSLLCMKPYKSAEDAHLYYGSAKVDPDWEENCPMHPVRDAIFGKWSGGSCVAIAPAFQEYANSTEDCAAILFDNSATDLDIDVVNEEFNELKELTSGLKRLNLSKVANAIFSPLSN…
121	YESVGSKSYR MPVGKCPVVG KIIDLGNGAD FLDPISSEDP SYRGLAFPET AVDSNIPTQP						Structural : CCCCCCCCCCCCCCCHHHHHHHHHHHHHHHHHHHHHHHCCCCCHHHHCCCCCCCCCCCCCCCCEEECCCCCCCCCCCCCCCCCCCCCCCCCCCCCHHHHHHHHCCCCCCCCCCEEEECCCCCECCCCCEECCCCCCCCCCCEEEECCCCCCCCCCCCCCCCCCCCCCCCCCCCCCCCCCCCCCCCCCCCCCCCCCCCHHHHHHHCCCCCCHHHHHHHCCCCCCCCCCCCEEECCEEEECCCCEEEEEEEEHHHCCCCCCCCCCCCCCCCCCCEEEEECCCCCCCCCEEEEECCCCCCCCCCCCCCCCCCCEEEEECCCCCCCCCHHHHHHHHHHHHHHHHHHCCCCCCCCHHHHHHCCCHHHHHHHCCCCCCHHHHHHCCCCCCCC…
181	KTRGSSSVTA AKLSPVSAKD LRRWGYEGND VANCSEYASN LIPASDKTTK YRYPFVFDSD						Surface : EEBEEEEEEEEBEBEBEBBBBBBBBBBBBBBBBBEEBBBEEEBBBBBBEEEEEEEBBEEEEEEEBEEEEEBEEEEEEEEEEEEEEEEEEEEEEEEBBEEBBEEBEBEEBBEEBBBBBBEEEEEBEEEEBEBBEEEBBBBBBBBBBEEEBEBBEEBEBEBEEBEEBEBEEBEEEEEEEEEEEEEEBEEBEBEEBBBBEBEBBEEBBEEEEEBEEBBEBBBBBBBBEEEEEBBBBBBBBBEEEEEBBBBBBBBBEEEEEEEBEEEEEEEEEEEBBBBBBBEEEEEEEEBBBBBBEBEEEBEEEBBEEEBEEBEBBEBEEEEBEEBEEBBEEBBEBBEEBBEBBBEEBBEEEEBEEBEEEBEEBEEBEEEBEEEBBEEBBEBBBBBBBEBEE…
241	NQMCYILYSA IQYNQGSRYC DNDGSSEEGT SSLLCMKPYK SAEDAHLYYG SAKVDPDWEE						1--------10--------20--------30--------40--------50--------60--------70--------80--------90--------100-------110-------120-------130-------140-------150-------160-------170-------180-------190-------200-------210-------220-------230-------240-------250-------260-------270-------280-------290-------300-------310-------320-------330-------340-------350-------360-------370-------380-------390-------…
301	NCPMHPVRDA IFGKWSGGSC VAIAPAFQEY ANSTEDCAAI LFDNSATDLD IDVVNEEFNE
361	LKELTSGLKR LNLSKVANAI FSPLSNVAGT SRISRGVGMN WATYDKDSGM CALINETPNC						Sequence Markup Types
421	LILNAGSIAL TAIGSPLEYD AVNYPCHIDT NGYVEPRAKT TNKYLDVPFE VTTALSMKTL						Epitopes: Positions above epitope threshold
481	KCNAYVHTKY SDSCGTYFLC SDVKPNWFIR FLHMIGLYNT KRIVIFVCCT TTAIVLTIWI						Structural: Helix (H), Sheet (E) and Coil (C) predicted using NetsurfP.
541	WKRFIKAKKE PAPPSFDKYL SNYDYDTTLD ADNETEQRLD SSAYSWGEAV QRPSDVTPVK						Surface: Buried(B)/Exposed(E) from NetsurfP's default threshold
601	LSKIN
Center position: 4 Threshold: 0.5
Predicted peptides:							Predicted residue scores:
No.	Start	End	Peptide	Length	Mean Score		Position	Residue	Score	Assignment
1	4	16	HYKMQSTSPKYNY	13	0.612		0	M	0.298	.
2	38	112	LASNSTLFAFHREPTNRRLTRRASRGQLLNSRRGSDDTSESSDRYSGRSGGSKNSGQSPWIKYMQKFDIPRNHGS	75	0.61612		1	Q	0.379	.
3	119	132	GGYESVGSKSYRMP	14	0.543071		2	L	0.454	.
4	150	213	DFLDPISSEDPSYRGLAFPETAVDSNIPTQPKTRGSSSVTAAKLSPVSAKDLRRWGYEGNDVAN	64	0.586125		3	H	0.542	E
5	224	231	ASDKTTKY	8	0.53275		4	Y	0.619	E
6	253	270	YNQGSRYCDNDGSSEEGT	18	0.605722		5	K	0.642	E
7	280	284	KSAED	5	0.5304		6	M	0.654	E
8	295	308	DPDWEENCPMHPVR	14	0.530714		7	Q	0.666	E
9	318	333	GSCVAIAPAFQEYANS	16	0.530188		8	S	0.669	E
10	343	373	DNSATDLDIDVVNEEFNELKELTSGLKRLNL	31	0.572839		9	T	0.663	E
11	381	409	FSPLSNVAGTSRISRGVGMNWATYDKDSG	29	0.593414		10	S	0.647	E
12	437	495	LEYDAVNYPCHIDTNGYVEPRAKTTNKYLDVPFEVTTALSMKTLKCNAYVHTKYSDSCG	59	0.546831		11	P	0.631	E
13	504	518	KPNWFIRFLHMIGLY	15	0.5422		12	K	0.6	E
14	547	600	AKKEPAPPSFDKYLSNYDYDTTLDADNETEQRLDSSAYSWGEAVQRPSDVTPVK	54	0.590519		13	Y	0.574	E
Note: Highlitlight with yellow is the epitopes located on the PAN motif of BbAMA-1 domain I (residue 147-305)							14	N	0.545	E
							15	Y	0.504	E
							16	K	0.461	.
							17	R	0.413	.
							18	M	0.361	.
							19	L	0.32	.
							20	C	0.276	.
							21	M	0.238	.
							22	V	0.204	.
							23	F	0.179	.
							24	V	0.164	.
							25	P	0.166	.
							26	V	0.182	.
							27	I	0.205	.
							28	L	0.224	.
							29	S	0.244	.
							30	S	0.285	.
							31	F	0.323	.
							32	F	0.357	.
							33	A	0.391	.
							34	E	0.432	.
							35	D	0.468	.
							36	A	0.487	.
							37	L	0.507	E
							38	A	0.53	E
							39	S	0.518	E
							40	N	0.516	E
							41	S	0.514	E
							42	T	0.511	E
							43	L	0.503	E
							44	F	0.506	E
							45	A	0.519	E
							46	F	0.525	E
							47	H	0.542	E
							48	R	0.57	E
							49	E	0.601	E
							50	P	0.626	E
							51	T	0.644	E
							52	N	0.656	E
							53	R	0.667	E
							54	R	0.681	E
							55	L	0.69	E
							56	T	0.683	E
							57	R	0.673	E
							58	R	0.65	E
							59	A	0.633	E
							60	S	0.627	E
							61	R	0.621	E
							62	G	0.604	E
							63	Q	0.587	E
							64	L	0.595	E
							65	L	0.609	E
							66	N	0.617	E
							67	S	0.63	E
							68	R	0.651	E
							69	R	0.675	E
							70	G	0.686	E
							71	S	0.704	E
							72	D	0.717	E
							73	D	0.706	E
							74	T	0.705	E
							75	S	0.714	E
							76	E	0.715	E
							77	S	0.71	E
							78	S	0.715	E
							79	D	0.715	E
							80	R	0.72	E
							81	Y	0.712	E
							82	S	0.717	E
							83	G	0.713	E
							84	R	0.71	E
							85	S	0.715	E
							86	G	0.709	E
							87	G	0.7	E
							88	S	0.693	E
							89	K	0.67	E
							90	N	0.659	E
							91	S	0.644	E
							92	G	0.623	E
							93	Q	0.608	E
							94	S	0.588	E
							95	P	0.576	E
							96	W	0.542	E
							97	I	0.536	E
							98	K	0.536	E
							99	Y	0.526	E
							100	M	0.533	E
							101	Q	0.528	E
							102	K	0.531	E
							103	F	0.541	E
							104	D	0.554	E
							105	I	0.582	E
							106	P	0.575	E
							107	R	0.563	E
							108	N	0.566	E
							109	H	0.534	E
							110	G	0.536	E
							111	S	0.501	E
							112	G	0.48	.
							113	I	0.47	.
							114	Y	0.457	.
							115	V	0.466	.
							116	D	0.474	.
							117	L	0.487	.
							118	G	0.507	E
							119	G	0.509	E
							120	Y	0.539	E
							121	E	0.553	E
							122	S	0.558	E
							123	V	0.564	E
							124	G	0.555	E
							125	S	0.555	E
							126	K	0.548	E
							127	S	0.554	E
							128	Y	0.556	E
							129	R	0.549	E
							130	M	0.541	E
							131	P	0.515	E
							132	V	0.498	.
							133	G	0.488	.
							134	K	0.473	.
							135	C	0.454	.
							136	P	0.441	.
							137	V	0.42	.
							138	V	0.393	.
							139	G	0.382	.
							140	K	0.372	.
							141	I	0.372	.
							142	I	0.388	.
							143	D	0.4	.
							144	L	0.422	.
							145	G	0.44	.
							146	N	0.453	.
							147	G	0.48	.
							148	A	0.498	.
							149	D	0.526	E
							150	F	0.534	E
							151	L	0.528	E
							152	D	0.539	E
							153	P	0.546	E
							154	I	0.545	E
							155	S	0.569	E
							156	S	0.58	E
							157	E	0.581	E
							158	D	0.598	E
							159	P	0.604	E
							160	S	0.606	E
							161	Y	0.592	E
							162	R	0.567	E
							163	G	0.551	E
							164	L	0.55	E
							165	A	0.545	E
							166	F	0.552	E
							167	P	0.545	E
							168	E	0.556	E
							169	T	0.571	E
							170	A	0.585	E
							171	V	0.613	E
							172	D	0.632	E
							173	S	0.627	E
							174	N	0.631	E
							175	I	0.637	E
							176	P	0.649	E
							177	T	0.652	E
							178	Q	0.674	E
							179	P	0.681	E
							180	K	0.688	E
							181	T	0.692	E
							182	R	0.699	E
							183	G	0.702	E
							184	S	0.7	E
							185	S	0.682	E
							186	S	0.671	E
							187	V	0.652	E
							188	T	0.617	E
							189	A	0.6	E
							190	A	0.582	E
							191	K	0.571	E
							192	L	0.56	E
							193	S	0.539	E
							194	P	0.546	E
							195	V	0.549	E
							196	S	0.524	E
							197	A	0.543	E
							198	K	0.549	E
							199	D	0.552	E
							200	L	0.548	E
							201	R	0.558	E
							202	R	0.575	E
							203	W	0.564	E
							204	G	0.561	E
							205	Y	0.573	E
							206	E	0.562	E
							207	G	0.558	E
							208	N	0.558	E
							209	D	0.538	E
							210	V	0.518	E
							211	A	0.506	E
							212	N	0.509	E
							213	C	0.485	.
							214	S	0.475	.
							215	E	0.478	.
							216	Y	0.454	.
							217	A	0.433	.
							218	S	0.443	.
							219	N	0.451	.
							220	L	0.458	.
							221	I	0.466	.
							222	P	0.494	.
							223	A	0.505	E
							224	S	0.513	E
							225	D	0.536	E
							226	K	0.552	E
							227	T	0.561	E
							228	T	0.552	E
							229	K	0.536	E
							230	Y	0.507	E
							231	R	0.477	.
							232	Y	0.459	.
							233	P	0.45	.
							234	F	0.448	.
							235	V	0.454	.
							236	F	0.449	.
							237	D	0.465	.
							238	S	0.458	.
							239	D	0.455	.
							240	N	0.448	.
							241	Q	0.43	.
							242	M	0.407	.
							243	C	0.378	.
							244	Y	0.342	.
							245	I	0.317	.
							246	L	0.301	.
							247	Y	0.307	.
							248	S	0.338	.
							249	A	0.38	.
							250	I	0.427	.
							251	Q	0.469	.
							252	Y	0.518	E
							253	N	0.565	E
							254	Q	0.595	E
							255	G	0.603	E
							256	S	0.621	E
							257	R	0.629	E
							258	Y	0.624	E
							259	C	0.623	E
							260	D	0.627	E
							261	N	0.617	E
							262	D	0.624	E
							263	G	0.638	E
							264	S	0.651	E
							265	S	0.644	E
							266	E	0.616	E
							267	E	0.597	E
							268	G	0.571	E
							269	T	0.54	E
							270	S	0.495	.
							271	S	0.448	.
							272	L	0.425	.
							273	L	0.41	.
							274	C	0.415	.
							275	M	0.428	.
							276	K	0.441	.
							277	P	0.464	.
							278	Y	0.487	.
							279	K	0.523	E
							280	S	0.543	E
							281	A	0.544	E
							282	E	0.532	E
							283	D	0.51	E
							284	A	0.481	.
							285	H	0.448	.
							286	L	0.414	.
							287	Y	0.399	.
							288	Y	0.399	.
							289	G	0.398	.
							290	S	0.407	.
							291	A	0.434	.
							292	K	0.459	.
							293	V	0.477	.
							294	D	0.514	E
							295	P	0.547	E
							296	D	0.553	E
							297	W	0.537	E
							298	E	0.55	E
							299	E	0.544	E
							300	N	0.54	E
							301	C	0.532	E
							302	P	0.531	E
							303	M	0.534	E
							304	H	0.524	E
							305	P	0.508	E
							306	V	0.515	E
							307	R	0.501	E
							308	D	0.484	.
							309	A	0.475	.
							310	I	0.47	.
							311	F	0.482	.
							312	G	0.463	.
							313	K	0.47	.
							314	W	0.491	.
							315	S	0.479	.
							316	G	0.49	.
							317	G	0.508	E
							318	S	0.506	E
							319	C	0.51	E
							320	V	0.511	E
							321	A	0.53	E
							322	I	0.517	E
							323	A	0.517	E
							324	P	0.546	E
							325	A	0.546	E
							326	F	0.541	E
							327	Q	0.557	E
							328	E	0.555	E
							329	Y	0.545	E
							330	A	0.538	E
							331	N	0.542	E
							332	S	0.514	E
							333	T	0.488	.
							334	E	0.48	.
							335	D	0.48	.
							336	C	0.446	.
							337	A	0.43	.
							338	A	0.444	.
							339	I	0.444	.
							340	L	0.453	.
							341	F	0.487	.
							342	D	0.518	E
							343	N	0.531	E
							344	S	0.545	E
							345	A	0.58	E
							346	T	0.596	E
							347	D	0.598	E
							348	L	0.601	E
							349	D	0.591	E
							350	I	0.585	E
							351	D	0.574	E
							352	V	0.577	E
							353	V	0.569	E
							354	N	0.564	E
							355	E	0.571	E
							356	E	0.567	E
							357	F	0.571	E
							358	N	0.582	E
							359	E	0.571	E
							360	L	0.572	E
							361	K	0.569	E
							362	E	0.575	E
							363	L	0.576	E
							364	T	0.593	E
							365	S	0.603	E
							366	G	0.594	E
							367	L	0.594	E
							368	K	0.59	E
							369	R	0.575	E
							370	L	0.568	E
							371	N	0.538	E
							372	L	0.52	E
							373	S	0.497	.
							374	K	0.484	.
							375	V	0.479	.
							376	A	0.475	.
							377	N	0.489	.
							378	A	0.492	.
							379	I	0.493	.
							380	F	0.526	E
							381	S	0.55	E
							382	P	0.56	E
							383	L	0.577	E
							384	S	0.591	E
							385	N	0.596	E
							386	V	0.603	E
							387	A	0.631	E
							388	G	0.644	E
							389	T	0.659	E
							390	S	0.674	E
							391	R	0.675	E
							392	I	0.668	E
							393	S	0.66	E
							394	R	0.656	E
							395	G	0.644	E
							396	V	0.623	E
							397	G	0.605	E
							398	M	0.576	E
							399	N	0.556	E
							400	W	0.555	E
							401	A	0.561	E
							402	T	0.568	E
							403	Y	0.568	E
							404	D	0.567	E
							405	K	0.549	E
							406	D	0.534	E
							407	S	0.53	E
							408	G	0.503	E
							409	M	0.476	.
							410	C	0.452	.
							411	A	0.441	.
							412	L	0.438	.
							413	I	0.432	.
							414	N	0.441	.
							415	E	0.433	.
							416	T	0.425	.
							417	P	0.412	.
							418	N	0.416	.
							419	C	0.418	.
							420	L	0.413	.
							421	I	0.405	.
							422	L	0.401	.
							423	N	0.391	.
							424	A	0.39	.
							425	G	0.375	.
							426	S	0.374	.
							427	I	0.361	.
							428	A	0.336	.
							429	L	0.32	.
							430	T	0.314	.
							431	A	0.331	.
							432	I	0.362	.
							433	G	0.395	.
							434	S	0.436	.
							435	P	0.486	.
							436	L	0.517	E
							437	E	0.55	E
							438	Y	0.573	E
							439	D	0.579	E
							440	A	0.573	E
							441	V	0.566	E
							442	N	0.564	E
							443	Y	0.552	E
							444	P	0.54	E
							445	C	0.527	E
							446	H	0.529	E
							447	I	0.524	E
							448	D	0.525	E
							449	T	0.517	E
							450	N	0.514	E
							451	G	0.514	E
							452	Y	0.53	E
							453	V	0.53	E
							454	E	0.551	E
							455	P	0.548	E
							456	R	0.555	E
							457	A	0.57	E
							458	K	0.593	E
							459	T	0.593	E
							460	T	0.584	E
							461	N	0.578	E
							462	K	0.578	E
							463	Y	0.571	E
							464	L	0.563	E
							465	D	0.557	E
							466	V	0.53	E
							467	P	0.509	E
							468	F	0.504	E
							469	E	0.505	E
							470	V	0.513	E
							471	T	0.526	E
							472	T	0.528	E
							473	A	0.544	E
							474	L	0.549	E
							475	S	0.563	E
							476	M	0.573	E
							477	K	0.558	E
							478	T	0.559	E
							479	L	0.541	E
							480	K	0.533	E
							481	C	0.533	E
							482	N	0.526	E
							483	A	0.525	E
							484	Y	0.538	E
							485	V	0.542	E
							486	H	0.561	E
							487	T	0.583	E
							488	K	0.593	E
							489	Y	0.579	E
							490	S	0.562	E
							491	D	0.555	E
							492	S	0.543	E
							493	C	0.518	E
							494	G	0.505	E
							495	T	0.471	.
							496	Y	0.444	.
							497	F	0.437	.
							498	L	0.45	.
							499	C	0.465	.
							500	S	0.473	.
							501	D	0.482	.
							502	V	0.499	.
							503	K	0.503	E
							504	P	0.525	E
							505	N	0.531	E
							506	W	0.54	E
							507	F	0.546	E
							508	I	0.549	E
							509	R	0.545	E
							510	F	0.551	E
							511	L	0.552	E
							512	H	0.553	E
							513	M	0.564	E
							514	I	0.562	E
							515	G	0.551	E
							516	L	0.539	E
							517	Y	0.522	E
							518	N	0.498	.
							519	T	0.459	.
							520	K	0.424	.
							521	R	0.383	.
							522	I	0.335	.
							523	V	0.292	.
							524	I	0.252	.
							525	F	0.216	.
							526	V	0.19	.
							527	C	0.179	.
							528	C	0.177	.
							529	T	0.171	.
							530	T	0.18	.
							531	T	0.19	.
							532	A	0.204	.
							533	I	0.222	.
							534	V	0.242	.
							535	L	0.242	.
							536	T	0.25	.
							537	I	0.262	.
							538	W	0.29	.
							539	I	0.297	.
							540	W	0.317	.
							541	K	0.348	.
							542	R	0.369	.
							543	F	0.395	.
							544	I	0.443	.
							545	K	0.494	.
							546	A	0.529	E
							547	K	0.548	E
							548	K	0.583	E
							549	E	0.595	E
							550	P	0.595	E
							551	A	0.591	E
							552	P	0.584	E
							553	P	0.579	E
							554	S	0.551	E
							555	F	0.551	E
							556	D	0.555	E
							557	K	0.555	E
							558	Y	0.573	E
							559	L	0.581	E
							560	S	0.594	E
							561	N	0.605	E
							562	Y	0.606	E
							563	D	0.612	E
							564	Y	0.611	E
							565	D	0.606	E
							566	T	0.602	E
							567	T	0.589	E
							568	L	0.586	E
							569	D	0.582	E
							570	A	0.58	E
							571	D	0.584	E
							572	N	0.605	E
							573	E	0.616	E
							574	T	0.616	E
							575	E	0.619	E
							576	Q	0.634	E
							577	R	0.645	E
							578	L	0.653	E
							579	D	0.649	E
							580	S	0.631	E
							581	S	0.592	E
							582	A	0.575	E
							583	Y	0.582	E
							584	S	0.579	E
							585	W	0.57	E
							586	G	0.577	E
							587	E	0.587	E
							588	A	0.588	E
							589	V	0.614	E
							590	Q	0.64	E
							591	R	0.638	E
							592	P	0.625	E
							593	S	0.62	E
							594	D	0.604	E
							595	V	0.583	E
							596	T	0.549	E
							597	P	0.541	E
							598	V	0.522	E
							599	K	0.507	E
							600	L	0.486	.
							601	S	0.429	.
							602	K	0.372	.
							603	I	0.32	.
							604	N	0.261

## Sheet: ABCpred
ABCpred server
Sequence name					BbAMA-1
Length of the sequence					605
Number of 20mers from the input sequence					586
Threshold setting (Default value is 0.5)					0.8
TABULAR RESULT
Predicted B-cell epitope
The predicted B cell epitopes are ranked according to their score obtained by trained recurrent neural network.
Higher score of the peptide means the higher probability to be as epitope.
All the peptides shown here are above the threshold value chosen
Rank	Sequence	Start position	Score		Note: Highlitlight with yellow is the epitopes located on the PAN motif of BbAMA-1 domain I (residue 147-305)
1	MHPVRDAIFGKWSGGSCVAI	304	0.92
1	SAKDLRRWGYEGNDVANCSE	197	0.92
1	VGSKSYRMPVGKCPVVGKII	124	0.92
2	KCPVVGKIIDLGNGADFLDP	135	0.9
3	LGNGADFLDPISSEDPSYRG	145	0.89
4	TLKCNAYVHTKYSDSCGTYF	479	0.88
4	SKVANAIFSPLSNVAGTSRI	374	0.88
4	KSAEDAHLYYGSAKVDPDWE	280	0.88
5	AKKEPAPPSFDKYLSNYDYD	547	0.87
5	KFDIPRNHGSGIYVDLGGYE	103	0.87
6	TSGLKRLNLSKVANAIFSPL	365	0.86
7	MNWATYDKDSGMCALINETP	399	0.85
8	SGGSKNSGQSPWIKYMQKFD	86	0.84
8	TTKYRYPFVFDSDNQMCYIL	228	0.84
9	FVCCTTTAIVLTIWIWKRFI	526	0.83
9	TQPKTRGSSSVTAAKLSPVS	178	0.83
9	HGSGIYVDLGGYESVGSKSY	110	0.83
10	FNELKELTSGLKRLNLSKVA	358	0.82
10	SEYASNLIPASDKTTKYRYP	215	0.82
11	SESSDRYSGRSGGSKNSGQS	76	0.81
11	SFDKYLSNYDYDTTLDADNE	555	0.81
11	AFPETAVDSNIPTQPKTRGS	166	0.81
12	YKMQSTSPKYNYKRMLCMVF	5	0.8
12	GNDVANCSEYASNLIPASDK	208	0.8

## Sheet: LBtope
LBtope : Prediction of Linear B-cell Epitopes
Probability scale in percentage (0-100%) for each epitope [Above 60% motif can be considered as epitope]
Note: Highlitlight with yellow is the PAN motif of BbAMA-1 domain I (residue 147-305)
Fixed length of epitopes (model trained on 20mer epitopes)		Fixed length of epitopes (model trained on 20mer epitopes)		Variable length of epitope (models trained on variable length of epitopes)		Variable length of epitope (models trained on variable length of epitopes)		Variable length of epitope (models trained on variable length of epitopes)
LBtope_Fixed ( original dataset)		LBtope_Fixed_non_redundant (non redundant dataset)		LBtope_Variable (original dataset)		LBtope_Variable_non_redundant (non redundant dataset)		LBtop_Confirm (confirm dataset) (Select length of epitopes: 30)
Epitopes of >BbAMA-1 SVM Score Percent Probabilty		Epitopes of >BbAMA-1 SVM Score Percent Probabilty		Epitopes of>BbAMA-1 SVM Score Percent Probabilty		Epitopes of >BbAMA-1 SVM Score Percent Probabilty of correct prediction		Epitopes of >BbAMA-1 SVM Score Percent Probabilty of correct prediction
of correct prediction		of correct prediction
XXXXXXXXXMQLHYKMQSTS 0.22376054 57.46		XXXXXXXXXMQLHYKMQSTS 0.29865255 59.96		XXXXXXXXXXXXMQLHYKMQSTSPK -0.37247402 37.58		XXXXXXXXXXXXXXMQLHYKMQSTSPKYNY -0.6580331 28.07		XXXXXXXXXXXXXXMQLHYKMQSTSPKYNY -0.14414221 45.20
XXXXXXXXMQLHYKMQSTSP 0.044606283 51.49		XXXXXXXXMQLHYKMQSTSP 0.11542315 53.85		XXXXXXXXXXXMQLHYKMQSTSPKY -0.33286406 38.90		XXXXXXXXXXXXXMQLHYKMQSTSPKYNYK -0.59889802 30.04		XXXXXXXXXXXXXMQLHYKMQSTSPKYNYK 0.0058015238 50.19
XXXXXXXMQLHYKMQSTSPK -0.050042123 48.33		XXXXXXXMQLHYKMQSTSPK -0.050637963 48.31		XXXXXXXXXXMQLHYKMQSTSPKYN -0.37081147 37.64		XXXXXXXXXXXXMQLHYKMQSTSPKYNYKR -0.57215905 30.93		XXXXXXXXXXXXMQLHYKMQSTSPKYNYKR 0.17686515 55.90
XXXXXXMQLHYKMQSTSPKY -0.16233852 44.59		XXXXXXMQLHYKMQSTSPKY -0.20285883 43.24		XXXXXXXXXMQLHYKMQSTSPKYNY -0.30387177 39.87		XXXXXXXXXXXMQLHYKMQSTSPKYNYKRM -0.54698307 31.77		XXXXXXXXXXXMQLHYKMQSTSPKYNYKRM 0.33920906 61.31
XXXXXMQLHYKMQSTSPKYN -0.24545683 41.82		XXXXXMQLHYKMQSTSPKYN -0.37463623 37.51		XXXXXXXXMQLHYKMQSTSPKYNYK -0.1994932 43.35		XXXXXXXXXXMQLHYKMQSTSPKYNYKRML -0.48611958 33.80		XXXXXXXXXXMQLHYKMQSTSPKYNYKRML 0.46972999 65.66
XXXXMQLHYKMQSTSPKYNY -0.15661859 44.78		XXXXMQLHYKMQSTSPKYNY -0.39524409 36.83		XXXXXXXMQLHYKMQSTSPKYNYKR -0.087751547 47.07		XXXXXXXXXMQLHYKMQSTSPKYNYKRMLC -0.41623792 36.13		XXXXXXXXXMQLHYKMQSTSPKYNYKRMLC 0.59910438 69.97
XXXMQLHYKMQSTSPKYNYK -0.020193379 49.33		XXXMQLHYKMQSTSPKYNYK -0.30521199 39.83		XXXXXXMQLHYKMQSTSPKYNYKRM -0.014244468 49.53		XXXXXXXXMQLHYKMQSTSPKYNYKRMLCM -0.37185933 37.60		XXXXXXXXMQLHYKMQSTSPKYNYKRMLCM 0.7242492 74.14
XXMQLHYKMQSTSPKYNYKR 0.24731831 58.24		XXMQLHYKMQSTSPKYNYKR -0.084452185 47.18		XXXXXMQLHYKMQSTSPKYNYKRML 0.10380518 53.46		XXXXXXXMQLHYKMQSTSPKYNYKRMLCMV -0.28830703 40.39		XXXXXXXMQLHYKMQSTSPKYNYKRMLCMV 0.70361681 73.45
XMQLHYKMQSTSPKYNYKRM 0.47134251 65.71		XMQLHYKMQSTSPKYNYKRM 0.33995288 61.33		XXXXMQLHYKMQSTSPKYNYKRMLC 0.20698077 56.90		XXXXXXMQLHYKMQSTSPKYNYKRMLCMVF -0.14350108 45.22		XXXXXXMQLHYKMQSTSPKYNYKRMLCMVF 0.69679167 73.23
MQLHYKMQSTSPKYNYKRML 0.40742318 63.58		MQLHYKMQSTSPKYNYKRML 0.40101831 63.37		XXXMQLHYKMQSTSPKYNYKRMLCM 0.38614738 62.87		XXXXXMQLHYKMQSTSPKYNYKRMLCMVFV -0.037038314 48.77		XXXXXMQLHYKMQSTSPKYNYKRMLCMVFV 0.6284416 70.95
QLHYKMQSTSPKYNYKRMLC 0.56061265 68.69		QLHYKMQSTSPKYNYKRMLC 0.37972401 62.66		XXMQLHYKMQSTSPKYNYKRMLCMV 0.43042011 64.35		XXXXMQLHYKMQSTSPKYNYKRMLCMVFVP 0.095893566 53.20		XXXXMQLHYKMQSTSPKYNYKRMLCMVFVP 0.55103329 68.37
LHYKMQSTSPKYNYKRMLCM 0.36325686 62.11		LHYKMQSTSPKYNYKRMLCM 0.16606969 55.54		XMQLHYKMQSTSPKYNYKRMLCMVF 0.45714582 65.24		XXXMQLHYKMQSTSPKYNYKRMLCMVFVPV 0.26390209 58.80		XXXMQLHYKMQSTSPKYNYKRMLCMVFVPV 0.33920004 61.31
HYKMQSTSPKYNYKRMLCMV 0.39763497 63.25		HYKMQSTSPKYNYKRMLCMV 0.029006126 50.97		MQLHYKMQSTSPKYNYKRMLCMVFV 0.43832228 64.61		XXMQLHYKMQSTSPKYNYKRMLCMVFVPVI 0.37674879 62.56		XXMQLHYKMQSTSPKYNYKRMLCMVFVPVI 0.094674221 53.16
YKMQSTSPKYNYKRMLCMVF 0.23678239 57.89		YKMQSTSPKYNYKRMLCMVF 0.0060971021 50.20		QLHYKMQSTSPKYNYKRMLCMVFVP 0.34395808 61.47		XMQLHYKMQSTSPKYNYKRMLCMVFVPVIL 0.42093825 64.03		XMQLHYKMQSTSPKYNYKRMLCMVFVPVIL -0.064022246 47.87
KMQSTSPKYNYKRMLCMVFV 0.13790928 54.60		KMQSTSPKYNYKRMLCMVFV -0.020248992 49.33		LHYKMQSTSPKYNYKRMLCMVFVPV 0.27973744 59.32		MQLHYKMQSTSPKYNYKRMLCMVFVPVILS 0.38120755 62.71		MQLHYKMQSTSPKYNYKRMLCMVFVPVILS -0.065347253 47.82
MQSTSPKYNYKRMLCMVFVP 0.16039128 55.35		MQSTSPKYNYKRMLCMVFVP -0.091442108 46.95		HYKMQSTSPKYNYKRMLCMVFVPVI 0.18264058 56.09		QLHYKMQSTSPKYNYKRMLCMVFVPVILSS 0.31024343 60.34		QLHYKMQSTSPKYNYKRMLCMVFVPVILSS 0.14042392 54.68
QSTSPKYNYKRMLCMVFVPV 0.36146344 62.05		QSTSPKYNYKRMLCMVFVPV 0.029722838 50.99		YKMQSTSPKYNYKRMLCMVFVPVIL 0.07618109 52.54		LHYKMQSTSPKYNYKRMLCMVFVPVILSSF 0.20233659 56.74		LHYKMQSTSPKYNYKRMLCMVFVPVILSSF 0.20937279 56.98
STSPKYNYKRMLCMVFVPVI 0.41821591 63.94		STSPKYNYKRMLCMVFVPVI 0.030773223 51.03		KMQSTSPKYNYKRMLCMVFVPVILS 0.067974012 52.27		HYKMQSTSPKYNYKRMLCMVFVPVILSSFF 0.12570602 54.19		HYKMQSTSPKYNYKRMLCMVFVPVILSSFF 0.29178792 59.73
TSPKYNYKRMLCMVFVPVIL 0.4375761 64.59		TSPKYNYKRMLCMVFVPVIL 0.15648201 55.22		MQSTSPKYNYKRMLCMVFVPVILSS 0.04868081 51.62		YKMQSTSPKYNYKRMLCMVFVPVILSSFFA 0.011304829 50.38		YKMQSTSPKYNYKRMLCMVFVPVILSSFFA 0.12627193 54.21
SPKYNYKRMLCMVFVPVILS 0.38065814 62.69		SPKYNYKRMLCMVFVPVILS 0.0043554225 50.15		QSTSPKYNYKRMLCMVFVPVILSSF -0.11004804 46.33		KMQSTSPKYNYKRMLCMVFVPVILSSFFAE 0.1348473 54.49		KMQSTSPKYNYKRMLCMVFVPVILSSFFAE 0.12284254 54.09
PKYNYKRMLCMVFVPVILSS 0.47773225 65.92		PKYNYKRMLCMVFVPVILSS 0.21127209 57.04		STSPKYNYKRMLCMVFVPVILSSFF -0.15873456 44.71		MQSTSPKYNYKRMLCMVFVPVILSSFFAED 0.12235188 54.08		MQSTSPKYNYKRMLCMVFVPVILSSFFAED 0.34632479 61.54
KYNYKRMLCMVFVPVILSSF 0.19722736 56.57		KYNYKRMLCMVFVPVILSSF 0.05807869 51.94		TSPKYNYKRMLCMVFVPVILSSFFA -0.20408873 43.20		QSTSPKYNYKRMLCMVFVPVILSSFFAEDA 0.11313348 53.77		QSTSPKYNYKRMLCMVFVPVILSSFFAEDA 0.52935854 67.65
YNYKRMLCMVFVPVILSSFF 0.22296408 57.43		YNYKRMLCMVFVPVILSSFF -0.13722425 45.43		SPKYNYKRMLCMVFVPVILSSFFAE -0.082890314 47.24		STSPKYNYKRMLCMVFVPVILSSFFAEDAL 0.021126616 50.70		STSPKYNYKRMLCMVFVPVILSSFFAEDAL 0.53276249 67.76
NYKRMLCMVFVPVILSSFFA -0.028064379 49.06		NYKRMLCMVFVPVILSSFFA -0.34395211 38.53		PKYNYKRMLCMVFVPVILSSFFAED 0.00074908607 50.02		TSPKYNYKRMLCMVFVPVILSSFFAEDALA 0.039583206 51.32		TSPKYNYKRMLCMVFVPVILSSFFAEDALA 0.42336318 64.11
YKRMLCMVFVPVILSSFFAE -0.22163289 42.61		YKRMLCMVFVPVILSSFFAE -0.52127363 32.62		KYNYKRMLCMVFVPVILSSFFAEDA -0.11106717 46.30		SPKYNYKRMLCMVFVPVILSSFFAEDALAS 0.13826193 54.61		SPKYNYKRMLCMVFVPVILSSFFAEDALAS 0.60939062 70.31
KRMLCMVFVPVILSSFFAED -0.082965674 47.23		KRMLCMVFVPVILSSFFAED -0.49085627 33.64		YNYKRMLCMVFVPVILSSFFAEDAL -0.36818474 37.73		PKYNYKRMLCMVFVPVILSSFFAEDALASN 0.11005928 53.67		PKYNYKRMLCMVFVPVILSSFFAEDALASN 0.38999239 63.00
RMLCMVFVPVILSSFFAEDA -0.21862784 42.71		RMLCMVFVPVILSSFFAEDA -0.49654874 33.45		NYKRMLCMVFVPVILSSFFAEDALA -0.36353284 37.88		KYNYKRMLCMVFVPVILSSFFAEDALASNS 0.062795692 52.09		KYNYKRMLCMVFVPVILSSFFAEDALASNS 0.35071131 61.69
MLCMVFVPVILSSFFAEDAL -0.31408688 39.53		MLCMVFVPVILSSFFAEDAL -0.64702689 28.43		YKRMLCMVFVPVILSSFFAEDALAS -0.15305391 44.90		YNYKRMLCMVFVPVILSSFFAEDALASNST 0.046066986 51.54		YNYKRMLCMVFVPVILSSFFAEDALASNST 0.29201856 59.73
LCMVFVPVILSSFFAEDALA -0.26758853 41.08		LCMVFVPVILSSFFAEDALA -0.55560814 31.48		KRMLCMVFVPVILSSFFAEDALASN -0.13567682 45.48		NYKRMLCMVFVPVILSSFFAEDALASNSTL 0.07168617 52.39		NYKRMLCMVFVPVILSSFFAEDALASNSTL 0.43265262 64.42
CMVFVPVILSSFFAEDALAS -0.33240122 38.92		CMVFVPVILSSFFAEDALAS -0.69517575 26.83		RMLCMVFVPVILSSFFAEDALASNS -0.14132545 45.29		YKRMLCMVFVPVILSSFFAEDALASNSTLF -0.054414827 48.19		YKRMLCMVFVPVILSSFFAEDALASNSTLF 0.2526402 58.42
MVFVPVILSSFFAEDALASN -0.26848501 41.05		MVFVPVILSSFFAEDALASN -0.82408751 22.53		MLCMVFVPVILSSFFAEDALASNST -0.04252507 48.58		KRMLCMVFVPVILSSFFAEDALASNSTLFA -0.1310965 45.63		KRMLCMVFVPVILSSFFAEDALASNSTLFA 0.2072903 56.91
VFVPVILSSFFAEDALASNS -0.40816022 36.39		VFVPVILSSFFAEDALASNS -0.79444667 23.52		LCMVFVPVILSSFFAEDALASNSTL -0.12415768 45.86		RMLCMVFVPVILSSFFAEDALASNSTLFAF -0.30727547 39.76		RMLCMVFVPVILSSFFAEDALASNSTLFAF 0.11801838 53.93
FVPVILSSFFAEDALASNST -0.52184344 32.61		FVPVILSSFFAEDALASNST -1.2117733 9.61		CMVFVPVILSSFFAEDALASNSTLF -0.26060144 41.31		MLCMVFVPVILSSFFAEDALASNSTLFAFH -0.19012857 43.66		MLCMVFVPVILSSFFAEDALASNSTLFAFH 0.23143771 57.71
VPVILSSFFAEDALASNSTL -0.49222723 33.59		VPVILSSFFAEDALASNSTL -1.1514394 11.62		MVFVPVILSSFFAEDALASNSTLFA -0.38686212 37.10		LCMVFVPVILSSFFAEDALASNSTLFAFHR -0.098235664 46.73		LCMVFVPVILSSFFAEDALASNSTLFAFHR 0.40103702 63.37
PVILSSFFAEDALASNSTLF -0.79148504 23.62		PVILSSFFAEDALASNSTLF -1.1632573 11.22		VFVPVILSSFFAEDALASNSTLFAF -0.34416138 38.53		CMVFVPVILSSFFAEDALASNSTLFAFHRE -0.074002505 47.53		CMVFVPVILSSFFAEDALASNSTLFAFHRE 0.4062797 63.54
VILSSFFAEDALASNSTLFA -0.89209416 20.26		VILSSFFAEDALASNSTLFA -1.0503713 14.99		FVPVILSSFFAEDALASNSTLFAFH -0.41166526 36.28		MVFVPVILSSFFAEDALASNSTLFAFHREP 0.020296566 50.68		MVFVPVILSSFFAEDALASNSTLFAFHREP 0.55331803 68.44
ILSSFFAEDALASNSTLFAF -0.77978811 24.01		ILSSFFAEDALASNSTLFAF -0.99919957 16.69		VPVILSSFFAEDALASNSTLFAFHR -0.2686284 41.05		VFVPVILSSFFAEDALASNSTLFAFHREPT 0.15039121 55.01		VFVPVILSSFFAEDALASNSTLFAFHREPT 0.77422235 75.81
LSSFFAEDALASNSTLFAFH -0.63566537 28.81		LSSFFAEDALASNSTLFAFH -0.76657671 24.45		PVILSSFFAEDALASNSTLFAFHRE -0.38466381 37.18		FVPVILSSFFAEDALASNSTLFAFHREPTN 0.21670518 57.22		FVPVILSSFFAEDALASNSTLFAFHREPTN 0.75621565 75.21
SSFFAEDALASNSTLFAFHR -0.45229628 34.92		SSFFAEDALASNSTLFAFHR -0.83244129 22.25		VILSSFFAEDALASNSTLFAFHREP -0.39665013 36.78		VPVILSSFFAEDALASNSTLFAFHREPTNR 0.41206055 63.74		VPVILSSFFAEDALASNSTLFAFHREPTNR 0.82423418 77.47
SFFAEDALASNSTLFAFHRE -0.47780963 34.07		SFFAEDALASNSTLFAFHRE -0.97866949 17.38		ILSSFFAEDALASNSTLFAFHREPT -0.3274493 39.09		PVILSSFFAEDALASNSTLFAFHREPTNRR 0.30163992 60.05		PVILSSFFAEDALASNSTLFAFHREPTNRR 0.92202656 80.73
FFAEDALASNSTLFAFHREP -0.27654978 40.78		FFAEDALASNSTLFAFHREP -0.84874526 21.71		LSSFFAEDALASNSTLFAFHREPTN 0.11644268 53.88		VILSSFFAEDALASNSTLFAFHREPTNRRL 0.26214139 58.74		VILSSFFAEDALASNSTLFAFHREPTNRRL 1.0985804 86.62
FAEDALASNSTLFAFHREPT -0.270414 40.99		FAEDALASNSTLFAFHREPT -0.67905424 27.36		SSFFAEDALASNSTLFAFHREPTNR 0.30852967 60.28		ILSSFFAEDALASNSTLFAFHREPTNRRLT 0.28318153 59.44		ILSSFFAEDALASNSTLFAFHREPTNRRLT 1.092661 86.42
AEDALASNSTLFAFHREPTN -0.16778155 44.41		AEDALASNSTLFAFHREPTN -0.48007748 34.00		SFFAEDALASNSTLFAFHREPTNRR 0.21979389 57.33		LSSFFAEDALASNSTLFAFHREPTNRRLTR 0.52392746 67.46		LSSFFAEDALASNSTLFAFHREPTNRRLTR 1.2157072 90.52
EDALASNSTLFAFHREPTNR 0.22717985 57.57		EDALASNSTLFAFHREPTNR -0.12851183 45.72		FFAEDALASNSTLFAFHREPTNRRL 0.20689321 56.90		SSFFAEDALASNSTLFAFHREPTNRRLTRR 0.49338786 66.45		SSFFAEDALASNSTLFAFHREPTNRRLTRR 1.2843101 92.81
DALASNSTLFAFHREPTNRR 0.045605074 51.52		DALASNSTLFAFHREPTNRR -0.40839754 36.39		FAEDALASNSTLFAFHREPTNRRLT 0.18652022 56.22		SFFAEDALASNSTLFAFHREPTNRRLTRRA 0.27266402 59.09		SFFAEDALASNSTLFAFHREPTNRRLTRRA 1.3070053 93.57
ALASNSTLFAFHREPTNRRL -0.062935576 47.90		ALASNSTLFAFHREPTNRRL -0.5882871 30.39		AEDALASNSTLFAFHREPTNRRLTR 0.45897164 65.30		FFAEDALASNSTLFAFHREPTNRRLTRRAS 0.25070765 58.36		FFAEDALASNSTLFAFHREPTNRRLTRRAS 1.2190355 90.63
LASNSTLFAFHREPTNRRLT -0.08510623 47.16		LASNSTLFAFHREPTNRRLT -0.42444684 35.85		EDALASNSTLFAFHREPTNRRLTRR 0.42103239 64.03		FAEDALASNSTLFAFHREPTNRRLTRRASR 0.45083726 65.03		FAEDALASNSTLFAFHREPTNRRLTRRASR 1.2381194 91.27
ASNSTLFAFHREPTNRRLTR 0.11344491 53.78		ASNSTLFAFHREPTNRRLTR -0.29955287 40.01		DALASNSTLFAFHREPTNRRLTRRA 0.2865579 59.55		AEDALASNSTLFAFHREPTNRRLTRRASRG 0.75880374 75.29		AEDALASNSTLFAFHREPTNRRLTRRASRG 1.3531921 95.11
SNSTLFAFHREPTNRRLTRR 0.19598819 56.53		SNSTLFAFHREPTNRRLTRR 0.050559503 51.69		ALASNSTLFAFHREPTNRRLTRRAS 0.3204537 60.68		EDALASNSTLFAFHREPTNRRLTRRASRGQ 0.82865987 77.62		EDALASNSTLFAFHREPTNRRLTRRASRGQ 1.4813767 99.38
NSTLFAFHREPTNRRLTRRA 0.39520617 63.17		NSTLFAFHREPTNRRLTRRA 0.1075434 53.58		LASNSTLFAFHREPTNRRLTRRASR 0.38532532 62.84		DALASNSTLFAFHREPTNRRLTRRASRGQL 0.71069927 73.69		DALASNSTLFAFHREPTNRRLTRRASRGQL 1.1802992 89.34
STLFAFHREPTNRRLTRRAS 0.45723962 65.24		STLFAFHREPTNRRLTRRAS -0.16076176 44.64		ASNSTLFAFHREPTNRRLTRRASRG 0.63242092 71.08		ALASNSTLFAFHREPTNRRLTRRASRGQLL 0.66703675 72.23		ALASNSTLFAFHREPTNRRLTRRASRGQLL 1.1998737 90.00
TLFAFHREPTNRRLTRRASR 0.3293988 60.98		TLFAFHREPTNRRLTRRASR -0.14614006 45.13		SNSTLFAFHREPTNRRLTRRASRGQ 0.71886195 73.96		LASNSTLFAFHREPTNRRLTRRASRGQLLN 0.64228022 71.41		LASNSTLFAFHREPTNRRLTRRASRGQLLN 1.1680952 88.94
LFAFHREPTNRRLTRRASRG 0.5525819 68.42		LFAFHREPTNRRLTRRASRG 0.024055085 50.80		NSTLFAFHREPTNRRLTRRASRGQL 0.60125852 70.04		ASNSTLFAFHREPTNRRLTRRASRGQLLNS 0.52491003 67.50		ASNSTLFAFHREPTNRRLTRRASRGQLLNS 1.2184128 90.61
FAFHREPTNRRLTRRASRGQ 0.85493973 78.50		FAFHREPTNRRLTRRASRGQ 0.13666503 54.56		STLFAFHREPTNRRLTRRASRGQLL 0.60949738 70.32		SNSTLFAFHREPTNRRLTRRASRGQLLNSR 0.76497377 75.50		SNSTLFAFHREPTNRRLTRRASRGQLLNSR 1.2988792 93.30
AFHREPTNRRLTRRASRGQL 0.99828758 83.28		AFHREPTNRRLTRRASRGQL 0.44005172 64.67		TLFAFHREPTNRRLTRRASRGQLLN 0.51091017 67.03		NSTLFAFHREPTNRRLTRRASRGQLLNSRR 0.70452892 73.48		NSTLFAFHREPTNRRLTRRASRGQLLNSRR 1.4269469 97.56
FHREPTNRRLTRRASRGQLL 0.76834684 75.61		FHREPTNRRLTRRASRGQLL 0.20838571 56.95		LFAFHREPTNRRLTRRASRGQLLNS 0.43046879 64.35		STLFAFHREPTNRRLTRRASRGQLLNSRRG 0.72476401 74.16		STLFAFHREPTNRRLTRRASRGQLLNSRRG 1.4448049 98.16
HREPTNRRLTRRASRGQLLN 0.66176346 72.06		HREPTNRRLTRRASRGQLLN 0.14351629 54.78		FAFHREPTNRRLTRRASRGQLLNSR 0.64259368 71.42		TLFAFHREPTNRRLTRRASRGQLLNSRRGS 0.65473735 71.82		TLFAFHREPTNRRLTRRASRGQLLNSRRGS 1.4682452 98.94
REPTNRRLTRRASRGQLLNS 0.54725347 68.24		REPTNRRLTRRASRGQLLNS 0.31557394 60.52		AFHREPTNRRLTRRASRGQLLNSRR 0.57832816 69.28		LFAFHREPTNRRLTRRASRGQLLNSRRGSD 0.68094575 72.70		LFAFHREPTNRRLTRRASRGQLLNSRRGSD 1.4542717 98.48
EPTNRRLTRRASRGQLLNSR 0.5706092 69.02		EPTNRRLTRRASRGQLLNSR 0.12393876 54.13		FHREPTNRRLTRRASRGQLLNSRRG 0.36692925 62.23		FAFHREPTNRRLTRRASRGQLLNSRRGSDD 0.69099639 73.03		FAFHREPTNRRLTRRASRGQLLNSRRGSDD 1.3413008 94.71
PTNRRLTRRASRGQLLNSRR 0.57708026 69.24		PTNRRLTRRASRGQLLNSRR 0.033989637 51.13		HREPTNRRLTRRASRGQLLNSRRGS 0.46454381 65.48		AFHREPTNRRLTRRASRGQLLNSRRGSDDT 0.68105559 72.70		AFHREPTNRRLTRRASRGQLLNSRRGSDDT 1.2778278 92.59
TNRRLTRRASRGQLLNSRRG 0.68681577 72.89		TNRRLTRRASRGQLLNSRRG -0.038671029 48.71		REPTNRRLTRRASRGQLLNSRRGSD 0.54265672 68.09		FHREPTNRRLTRRASRGQLLNSRRGSDDTS 0.70658333 73.55		FHREPTNRRLTRRASRGQLLNSRRGSDDTS 1.2391965 91.31
NRRLTRRASRGQLLNSRRGS 0.67482523 72.49		NRRLTRRASRGQLLNSRRGS -0.099378643 46.69		EPTNRRLTRRASRGQLLNSRRGSDD 0.32524371 60.84		HREPTNRRLTRRASRGQLLNSRRGSDDTSE 0.70567968 73.52		HREPTNRRLTRRASRGQLLNSRRGSDDTSE 1.106354 86.88
RRLTRRASRGQLLNSRRGSD 0.40483595 63.49		RRLTRRASRGQLLNSRRGSD -0.28004946 40.67		PTNRRLTRRASRGQLLNSRRGSDDT 0.22878684 57.63		REPTNRRLTRRASRGQLLNSRRGSDDTSES 0.73224789 74.41		REPTNRRLTRRASRGQLLNSRRGSDDTSES 1.1291246 87.64
RLTRRASRGQLLNSRRGSDD 0.31192074 60.40		RLTRRASRGQLLNSRRGSDD -0.25400188 41.53		TNRRLTRRASRGQLLNSRRGSDDTS 0.13210114 54.40		EPTNRRLTRRASRGQLLNSRRGSDDTSESS 0.75998681 75.33		EPTNRRLTRRASRGQLLNSRRGSDDTSESS 1.113983 87.13
LTRRASRGQLLNSRRGSDDT 0.26337273 58.78		LTRRASRGQLLNSRRGSDDT -0.15777543 44.74		NRRLTRRASRGQLLNSRRGSDDTSE -0.14742448 45.09		PTNRRLTRRASRGQLLNSRRGSDDTSESSD 0.83129766 77.71		PTNRRLTRRASRGQLLNSRRGSDDTSESSD 1.039172 84.64
TRRASRGQLLNSRRGSDDTS 0.27164474 59.05		TRRASRGQLLNSRRGSDDTS -0.19601643 43.47		RRLTRRASRGQLLNSRRGSDDTSES -0.35989171 38.00		TNRRLTRRASRGQLLNSRRGSDDTSESSDR 0.9664835 82.22		TNRRLTRRASRGQLLNSRRGSDDTSESSDR 0.94081986 81.36
RRASRGQLLNSRRGSDDTSE 0.16852084 55.62		RRASRGQLLNSRRGSDDTSE -0.11226376 46.26		RLTRRASRGQLLNSRRGSDDTSESS -0.24209507 41.93		NRRLTRRASRGQLLNSRRGSDDTSESSDRY 0.75656299 75.22		NRRLTRRASRGQLLNSRRGSDDTSESSDRY 0.9071538 80.24
RASRGQLLNSRRGSDDTSES 0.12102565 54.03		RASRGQLLNSRRGSDDTSES 0.10237498 53.41		LTRRASRGQLLNSRRGSDDTSESSD -0.22739451 42.42		RRLTRRASRGQLLNSRRGSDDTSESSDRYS 0.63999543 71.33		RRLTRRASRGQLLNSRRGSDDTSESSDRYS 0.90561283 80.19
ASRGQLLNSRRGSDDTSESS 0.17642504 55.88		ASRGQLLNSRRGSDDTSESS 0.17744136 55.91		TRRASRGQLLNSRRGSDDTSESSDR -0.083163012 47.23		RLTRRASRGQLLNSRRGSDDTSESSDRYSG 0.64309044 71.44		RLTRRASRGQLLNSRRGSDDTSESSDRYSG 0.86192756 78.73
SRGQLLNSRRGSDDTSESSD 0.32031994 60.68		SRGQLLNSRRGSDDTSESSD 0.32655376 60.89		RRASRGQLLNSRRGSDDTSESSDRY -0.22409908 42.53		LTRRASRGQLLNSRRGSDDTSESSDRYSGR 0.69297611 73.10		LTRRASRGQLLNSRRGSDDTSESSDRYSGR 0.73542832 74.51
RGQLLNSRRGSDDTSESSDR 0.45478622 65.16		RGQLLNSRRGSDDTSESSDR 0.54548134 68.18		RASRGQLLNSRRGSDDTSESSDRYS -0.24220301 41.93		TRRASRGQLLNSRRGSDDTSESSDRYSGRS 0.6154908 70.52		TRRASRGQLLNSRRGSDDTSESSDRYSGRS 0.87869838 79.29
GQLLNSRRGSDDTSESSDRY 0.67953491 72.65		GQLLNSRRGSDDTSESSDRY 0.94454094 81.48		ASRGQLLNSRRGSDDTSESSDRYSG -0.47356921 34.21		RRASRGQLLNSRRGSDDTSESSDRYSGRSG 0.44672301 64.89		RRASRGQLLNSRRGSDDTSESSDRYSGRSG 0.68992244 73.00
QLLNSRRGSDDTSESSDRYS 0.67558856 72.52		QLLNSRRGSDDTSESSDRYS 0.82702702 77.57		SRGQLLNSRRGSDDTSESSDRYSGR -0.35855655 38.05		RASRGQLLNSRRGSDDTSESSDRYSGRSGG 0.33658781 61.22		RASRGQLLNSRRGSDDTSESSDRYSGRSGG 0.57608872 69.20
LLNSRRGSDDTSESSDRYSG 0.61700331 70.57		LLNSRRGSDDTSESSDRYSG 0.71994406 74.00		RGQLLNSRRGSDDTSESSDRYSGRS -0.33277651 38.91		ASRGQLLNSRRGSDDTSESSDRYSGRSGGS 0.2821442 59.40		ASRGQLLNSRRGSDDTSESSDRYSGRSGGS 0.48224098 66.07
LNSRRGSDDTSESSDRYSGR 0.63101358 71.03		LNSRRGSDDTSESSDRYSGR 0.77630944 75.88		GQLLNSRRGSDDTSESSDRYSGRSG -0.26541302 41.15		SRGQLLNSRRGSDDTSESSDRYSGRSGGSK 0.26892167 58.96		SRGQLLNSRRGSDDTSESSDRYSGRSGGSK 0.51390063 67.13
NSRRGSDDTSESSDRYSGRS 0.55755202 68.59		NSRRGSDDTSESSDRYSGRS 0.73468455 74.49		QLLNSRRGSDDTSESSDRYSGRSGG -0.26995257 41.00		RGQLLNSRRGSDDTSESSDRYSGRSGGSKN 0.49811051 66.60		RGQLLNSRRGSDDTSESSDRYSGRSGGSKN 0.60459822 70.15
SRRGSDDTSESSDRYSGRSG 0.59893061 69.96		SRRGSDDTSESSDRYSGRSG 0.66923388 72.31		LLNSRRGSDDTSESSDRYSGRSGGS -0.12768398 45.74		GQLLNSRRGSDDTSESSDRYSGRSGGSKNS 0.5791464 69.30		GQLLNSRRGSDDTSESSDRYSGRSGGSKNS 0.54872725 68.29
RRGSDDTSESSDRYSGRSGG 0.86049686 78.68		RRGSDDTSESSDRYSGRSGG 1.1118851 87.06		LNSRRGSDDTSESSDRYSGRSGGSK -0.019710367 49.34		QLLNSRRGSDDTSESSDRYSGRSGGSKNSG 0.51263321 67.09		QLLNSRRGSDDTSESSDRYSGRSGGSKNSG 0.35158882 61.72
RGSDDTSESSDRYSGRSGGS 0.92018392 80.67		RGSDDTSESSDRYSGRSGGS 1.4270996 97.57		NSRRGSDDTSESSDRYSGRSGGSKN 0.14833879 54.94		LLNSRRGSDDTSESSDRYSGRSGGSKNSGQ 0.51601115 67.20		LLNSRRGSDDTSESSDRYSGRSGGSKNSGQ 0.47916534 65.97
GSDDTSESSDRYSGRSGGSK 1.2739364 92.46		GSDDTSESSDRYSGRSGGSK 1.4285411 97.62		SRRGSDDTSESSDRYSGRSGGSKNS 0.14833879 54.94		LNSRRGSDDTSESSDRYSGRSGGSKNSGQS 0.60960878 70.32		LNSRRGSDDTSESSDRYSGRSGGSKNSGQS 0.35716224 61.91
SDDTSESSDRYSGRSGGSKN 1.406627 96.89		SDDTSESSDRYSGRSGGSKN 1.6476156 100.0		RRGSDDTSESSDRYSGRSGGSKNSG 0.071053417 52.37		NSRRGSDDTSESSDRYSGRSGGSKNSGQSP 0.80205771 76.74		NSRRGSDDTSESSDRYSGRSGGSKNSGQSP 0.48633933 66.21
DDTSESSDRYSGRSGGSKNS 1.2184188 90.61		DDTSESSDRYSGRSGGSKNS 1.4821865 99.41		RGSDDTSESSDRYSGRSGGSKNSGQ -0.064786598 47.84		SRRGSDDTSESSDRYSGRSGGSKNSGQSPW 0.81292459 77.10		SRRGSDDTSESSDRYSGRSGGSKNSGQSPW 0.58034197 69.34
DTSESSDRYSGRSGGSKNSG 1.1876785 89.59		DTSESSDRYSGRSGGSKNSG 1.2688401 92.29		GSDDTSESSDRYSGRSGGSKNSGQS -0.054356706 48.19		RRGSDDTSESSDRYSGRSGGSKNSGQSPWI 0.73756818 74.59		RRGSDDTSESSDRYSGRSGGSKNSGQSPWI 0.59854849 69.95
TSESSDRYSGRSGGSKNSGQ 1.1244182 87.48		TSESSDRYSGRSGGSKNSGQ 0.92424292 80.81		SDDTSESSDRYSGRSGGSKNSGQSP 0.0079831954 50.27		RGSDDTSESSDRYSGRSGGSKNSGQSPWIK 0.77317594 75.77		RGSDDTSESSDRYSGRSGGSKNSGQSPWIK 0.51694043 67.23
SESSDRYSGRSGGSKNSGQS 1.1846518 89.49		SESSDRYSGRSGGSKNSGQS 0.86110449 78.70		DDTSESSDRYSGRSGGSKNSGQSPW 0.026631481 50.89		GSDDTSESSDRYSGRSGGSKNSGQSPWIKY 0.71211121 73.74		GSDDTSESSDRYSGRSGGSKNSGQSPWIKY 0.60213082 70.07
ESSDRYSGRSGGSKNSGQSP 1.1002903 86.68		ESSDRYSGRSGGSKNSGQSP 0.70174058 73.39		DTSESSDRYSGRSGGSKNSGQSPWI -0.075928029 47.47		SDDTSESSDRYSGRSGGSKNSGQSPWIKYM 0.78528148 76.18		SDDTSESSDRYSGRSGGSKNSGQSPWIKYM 0.6216939 70.72
SSDRYSGRSGGSKNSGQSPW 1.1048588 86.83		SSDRYSGRSGGSKNSGQSPW 0.63448984 71.15		TSESSDRYSGRSGGSKNSGQSPWIK -0.027184504 49.09		DDTSESSDRYSGRSGGSKNSGQSPWIKYMQ 0.75821877 75.27		DDTSESSDRYSGRSGGSKNSGQSPWIKYMQ 0.41265576 63.76
SDRYSGRSGGSKNSGQSPWI 1.181566 89.39		SDRYSGRSGGSKNSGQSPWI 0.60887008 70.30		SESSDRYSGRSGGSKNSGQSPWIKY -0.0077491372 49.74		DTSESSDRYSGRSGGSKNSGQSPWIKYMQK 0.85971356 78.66		DTSESSDRYSGRSGGSKNSGQSPWIKYMQK 0.65905229 71.97
DRYSGRSGGSKNSGQSPWIK 1.0496697 84.99		DRYSGRSGGSKNSGQSPWIK 0.41061175 63.69		ESSDRYSGRSGGSKNSGQSPWIKYM -0.0064767186 49.78		TSESSDRYSGRSGGSKNSGQSPWIKYMQKF 0.83054329 77.68		TSESSDRYSGRSGGSKNSGQSPWIKYMQKF 0.69682685 73.23
RYSGRSGGSKNSGQSPWIKY 0.9890728 82.97		RYSGRSGGSKNSGQSPWIKY 0.57195004 69.07		SSDRYSGRSGGSKNSGQSPWIKYMQ -0.0039592014 49.87		SESSDRYSGRSGGSKNSGQSPWIKYMQKFD 0.93684298 81.23		SESSDRYSGRSGGSKNSGQSPWIKYMQKFD 0.90358559 80.12
YSGRSGGSKNSGQSPWIKYM 1.0058141 83.53		YSGRSGGSKNSGQSPWIKYM 0.49132211 66.38		SDRYSGRSGGSKNSGQSPWIKYMQK 0.20701712 56.90		ESSDRYSGRSGGSKNSGQSPWIKYMQKFDI 0.84256108 78.09		ESSDRYSGRSGGSKNSGQSPWIKYMQKFDI 1.001152 83.37
SGRSGGSKNSGQSPWIKYMQ 0.87919456 79.31		SGRSGGSKNSGQSPWIKYMQ 0.61402336 70.47		DRYSGRSGGSKNSGQSPWIKYMQKF 0.23182918 57.73		SSDRYSGRSGGSKNSGQSPWIKYMQKFDIP 0.81077496 77.03		SSDRYSGRSGGSKNSGQSPWIKYMQKFDIP 1.0357396 84.52
GRSGGSKNSGQSPWIKYMQK 0.7959642 76.53		GRSGGSKNSGQSPWIKYMQK 0.6178067 70.59		RYSGRSGGSKNSGQSPWIKYMQKFD 0.35598002 61.87		SDRYSGRSGGSKNSGQSPWIKYMQKFDIPR 0.94900691 81.63		SDRYSGRSGGSKNSGQSPWIKYMQKFDIPR 1.1207201 87.36
RSGGSKNSGQSPWIKYMQKF 0.75412586 75.14		RSGGSKNSGQSPWIKYMQKF 0.64181551 71.39		YSGRSGGSKNSGQSPWIKYMQKFDI 0.33015752 61.01		DRYSGRSGGSKNSGQSPWIKYMQKFDIPRN 0.83280248 77.76		DRYSGRSGGSKNSGQSPWIKYMQKFDIPRN 1.0526822 85.09
SGGSKNSGQSPWIKYMQKFD 0.88245522 79.42		SGGSKNSGQSPWIKYMQKFD 0.82844314 77.61		SGRSGGSKNSGQSPWIKYMQKFDIP 0.43862155 64.62		RYSGRSGGSKNSGQSPWIKYMQKFDIPRNH 0.85029587 78.34		RYSGRSGGSKNSGQSPWIKYMQKFDIPRNH 0.98446087 82.82
GGSKNSGQSPWIKYMQKFDI 0.65908494 71.97		GGSKNSGQSPWIKYMQKFDI 0.55571713 68.52		GRSGGSKNSGQSPWIKYMQKFDIPR 0.6219583 70.73		YSGRSGGSKNSGQSPWIKYMQKFDIPRNHG 0.8598346 78.66		YSGRSGGSKNSGQSPWIKYMQKFDIPRNHG 1.0115487 83.72
GSKNSGQSPWIKYMQKFDIP 0.47473989 65.82		GSKNSGQSPWIKYMQKFDIP 0.39490179 63.16		RSGGSKNSGQSPWIKYMQKFDIPRN 0.65097558 71.70		SGRSGGSKNSGQSPWIKYMQKFDIPRNHGS 0.81300415 77.10		SGRSGGSKNSGQSPWIKYMQKFDIPRNHGS 0.96636442 82.21
SKNSGQSPWIKYMQKFDIPR 0.63684445 71.23		SKNSGQSPWIKYMQKFDIPR 0.50464901 66.82		SGGSKNSGQSPWIKYMQKFDIPRNH 0.67626071 72.54		GRSGGSKNSGQSPWIKYMQKFDIPRNHGSG 0.81300415 77.10		GRSGGSKNSGQSPWIKYMQKFDIPRNHGSG 0.96636442 82.21
KNSGQSPWIKYMQKFDIPRN 0.5987126 69.96		KNSGQSPWIKYMQKFDIPRN 0.68470937 72.82		GGSKNSGQSPWIKYMQKFDIPRNHG 0.71158405 73.72		RSGGSKNSGQSPWIKYMQKFDIPRNHGSGI 0.86805369 78.94		RSGGSKNSGQSPWIKYMQKFDIPRNHGSGI 0.99349254 83.12
NSGQSPWIKYMQKFDIPRNH 0.61177835 70.39		NSGQSPWIKYMQKFDIPRNH 0.47463671 65.82		GSKNSGQSPWIKYMQKFDIPRNHGS 0.46289701 65.43		SGGSKNSGQSPWIKYMQKFDIPRNHGSGIY 0.75488746 75.16		SGGSKNSGQSPWIKYMQKFDIPRNHGSGIY 0.77789873 75.93
SGQSPWIKYMQKFDIPRNHG 0.65234269 71.74		SGQSPWIKYMQKFDIPRNHG 0.39452543 63.15		SKNSGQSPWIKYMQKFDIPRNHGSG 0.44335402 64.78		GGSKNSGQSPWIKYMQKFDIPRNHGSGIYV 0.78835544 76.28		GGSKNSGQSPWIKYMQKFDIPRNHGSGIYV 0.90171046 80.06
GQSPWIKYMQKFDIPRNHGS 0.54409979 68.14		GQSPWIKYMQKFDIPRNHGS 0.28933172 59.64		KNSGQSPWIKYMQKFDIPRNHGSGI 0.45178193 65.06		GSKNSGQSPWIKYMQKFDIPRNHGSGIYVD 0.65587452 71.86		GSKNSGQSPWIKYMQKFDIPRNHGSGIYVD 1.0021113 83.40
QSPWIKYMQKFDIPRNHGSG 0.50342042 66.78		QSPWIKYMQKFDIPRNHGSG 0.41051285 63.68		NSGQSPWIKYMQKFDIPRNHGSGIY 0.407165 63.57		SKNSGQSPWIKYMQKFDIPRNHGSGIYVDL 0.70889986 73.63		SKNSGQSPWIKYMQKFDIPRNHGSGIYVDL 1.1200025 87.33
SPWIKYMQKFDIPRNHGSGI 0.49267254 66.42		SPWIKYMQKFDIPRNHGSGI 0.42313996 64.10		SGQSPWIKYMQKFDIPRNHGSGIYV 0.32578239 60.86		KNSGQSPWIKYMQKFDIPRNHGSGIYVDLG 0.73127993 74.38		KNSGQSPWIKYMQKFDIPRNHGSGIYVDLG 1.1123673 87.08
PWIKYMQKFDIPRNHGSGIY 0.52644215 67.55		PWIKYMQKFDIPRNHGSGIY 0.40501534 63.50		GQSPWIKYMQKFDIPRNHGSGIYVD 0.47011413 65.67		NSGQSPWIKYMQKFDIPRNHGSGIYVDLGG 0.79086598 76.36		NSGQSPWIKYMQKFDIPRNHGSGIYVDLGG 1.0353271 84.51
WIKYMQKFDIPRNHGSGIYV 0.48994253 66.33		WIKYMQKFDIPRNHGSGIYV 0.35742321 61.91		QSPWIKYMQKFDIPRNHGSGIYVDL 0.57131868 69.04		SGQSPWIKYMQKFDIPRNHGSGIYVDLGGY 0.75074152 75.02		SGQSPWIKYMQKFDIPRNHGSGIYVDLGGY 1.0893763 86.31
IKYMQKFDIPRNHGSGIYVD 0.50162196 66.72		IKYMQKFDIPRNHGSGIYVD 0.4088197 63.63		SPWIKYMQKFDIPRNHGSGIYVDLG 0.63505463 71.17		GQSPWIKYMQKFDIPRNHGSGIYVDLGGYE 0.74403582 74.80		GQSPWIKYMQKFDIPRNHGSGIYVDLGGYE 1.1884728 89.62
KYMQKFDIPRNHGSGIYVDL 0.70545963 73.52		KYMQKFDIPRNHGSGIYVDL 0.40963354 63.65		PWIKYMQKFDIPRNHGSGIYVDLGG 0.63741653 71.25		QSPWIKYMQKFDIPRNHGSGIYVDLGGYES 0.85388174 78.46		QSPWIKYMQKFDIPRNHGSGIYVDLGGYES 1.1163501 87.21
YMQKFDIPRNHGSGIYVDLG 0.67623243 72.54		YMQKFDIPRNHGSGIYVDLG 0.20215699 56.74		WIKYMQKFDIPRNHGSGIYVDLGGY 0.81996771 77.33		SPWIKYMQKFDIPRNHGSGIYVDLGGYESV 0.82054341 77.35		SPWIKYMQKFDIPRNHGSGIYVDLGGYESV 1.1649806 88.83
MQKFDIPRNHGSGIYVDLGG 0.80629876 76.88		MQKFDIPRNHGSGIYVDLGG 0.44048661 64.68		IKYMQKFDIPRNHGSGIYVDLGGYE 0.99954683 83.32		PWIKYMQKFDIPRNHGSGIYVDLGGYESVG 0.81309758 77.10		PWIKYMQKFDIPRNHGSGIYVDLGGYESVG 1.1048141 86.83
QKFDIPRNHGSGIYVDLGGY 1.0881967 86.27		QKFDIPRNHGSGIYVDLGGY 0.68531164 72.84		KYMQKFDIPRNHGSGIYVDLGGYES 0.94325761 81.44		WIKYMQKFDIPRNHGSGIYVDLGGYESVGS 0.78927627 76.31		WIKYMQKFDIPRNHGSGIYVDLGGYESVGS 1.1595095 88.65
KFDIPRNHGSGIYVDLGGYE 0.90859755 80.29		KFDIPRNHGSGIYVDLGGYE 0.4221344 64.07		YMQKFDIPRNHGSGIYVDLGGYESV 0.68378139 72.79		IKYMQKFDIPRNHGSGIYVDLGGYESVGSK 0.95630791 81.88		IKYMQKFDIPRNHGSGIYVDLGGYESVGSK 1.0978609 86.60
FDIPRNHGSGIYVDLGGYES 0.76947269 75.65		FDIPRNHGSGIYVDLGGYES 0.25498511 58.50		MQKFDIPRNHGSGIYVDLGGYESVG 0.54202334 68.07		KYMQKFDIPRNHGSGIYVDLGGYESVGSKS 1.1036122 86.79		KYMQKFDIPRNHGSGIYVDLGGYESVGSKS 1.0656799 85.52
DIPRNHGSGIYVDLGGYESV 0.56559692 68.85		DIPRNHGSGIYVDLGGYESV 0.14789332 54.93		QKFDIPRNHGSGIYVDLGGYESVGS 0.44073591 64.69		YMQKFDIPRNHGSGIYVDLGGYESVGSKSY 1.1336896 87.79		YMQKFDIPRNHGSGIYVDLGGYESVGSKSY 0.89723845 79.91
IPRNHGSGIYVDLGGYESVG 0.52650911 67.55		IPRNHGSGIYVDLGGYESVG 0.1286301 54.29		KFDIPRNHGSGIYVDLGGYESVGSK 0.29804133 59.93		MQKFDIPRNHGSGIYVDLGGYESVGSKSYR 1.1505271 88.35		MQKFDIPRNHGSGIYVDLGGYESVGSKSYR 0.90656206 80.22
PRNHGSGIYVDLGGYESVGS 0.55009635 68.34		PRNHGSGIYVDLGGYESVGS 0.27736012 59.25		FDIPRNHGSGIYVDLGGYESVGSKS 0.65843864 71.95		QKFDIPRNHGSGIYVDLGGYESVGSKSYRM 0.9356018 81.19		QKFDIPRNHGSGIYVDLGGYESVGSKSYRM 0.98944124 82.98
RNHGSGIYVDLGGYESVGSK 0.67617628 72.54		RNHGSGIYVDLGGYESVGSK 0.48335504 66.11		DIPRNHGSGIYVDLGGYESVGSKSY 0.75790356 75.26		KFDIPRNHGSGIYVDLGGYESVGSKSYRMP 0.79294399 76.43		KFDIPRNHGSGIYVDLGGYESVGSKSYRMP 0.76679844 75.56
NHGSGIYVDLGGYESVGSKS 0.94687052 81.56		NHGSGIYVDLGGYESVGSKS 0.90598021 80.20		IPRNHGSGIYVDLGGYESVGSKSYR 0.83295771 77.77		FDIPRNHGSGIYVDLGGYESVGSKSYRMPV 0.81490291 77.16		FDIPRNHGSGIYVDLGGYESVGSKSYRMPV 0.65224061 71.74
HGSGIYVDLGGYESVGSKSY 0.99368922 83.12		HGSGIYVDLGGYESVGSKSY 1.0781526 85.94		PRNHGSGIYVDLGGYESVGSKSYRM 0.60523225 70.17		DIPRNHGSGIYVDLGGYESVGSKSYRMPVG 0.72630494 74.21		DIPRNHGSGIYVDLGGYESVGSKSYRMPVG 0.53434422 67.81
GSGIYVDLGGYESVGSKSYR 0.9952638 83.18		GSGIYVDLGGYESVGSKSYR 1.1991827 89.97		RNHGSGIYVDLGGYESVGSKSYRMP 0.45846293 65.28		IPRNHGSGIYVDLGGYESVGSKSYRMPVGK 0.7506098 75.02		IPRNHGSGIYVDLGGYESVGSKSYRMPVGK 0.5175724 67.25
SGIYVDLGGYESVGSKSYRM 0.96061037 82.02		SGIYVDLGGYESVGSKSYRM 1.1129877 87.10		NHGSGIYVDLGGYESVGSKSYRMPV 0.529881 67.66		PRNHGSGIYVDLGGYESVGSKSYRMPVGKC 0.6488334 71.63		PRNHGSGIYVDLGGYESVGSKSYRMPVGKC 0.47972794 65.99
GIYVDLGGYESVGSKSYRMP 1.0094798 83.65		GIYVDLGGYESVGSKSYRMP 1.0192696 83.98		HGSGIYVDLGGYESVGSKSYRMPVG 0.28764683 59.59		RNHGSGIYVDLGGYESVGSKSYRMPVGKCP 0.46015973 65.34		RNHGSGIYVDLGGYESVGSKSYRMPVGKCP 0.3212873 60.71
IYVDLGGYESVGSKSYRMPV 1.1675811 88.92		IYVDLGGYESVGSKSYRMPV 1.2579563 91.93		GSGIYVDLGGYESVGSKSYRMPVGK 0.20065022 56.69		NHGSGIYVDLGGYESVGSKSYRMPVGKCPV 0.47473972 65.82		NHGSGIYVDLGGYESVGSKSYRMPVGKCPV 0.13846952 54.62
YVDLGGYESVGSKSYRMPVG 1.0224305 84.08		YVDLGGYESVGSKSYRMPVG 1.1963119 89.88		SGIYVDLGGYESVGSKSYRMPVGKC 0.19799834 56.60		HGSGIYVDLGGYESVGSKSYRMPVGKCPVV 0.61299469 70.43		HGSGIYVDLGGYESVGSKSYRMPVGKCPVV 0.23279819 57.76
VDLGGYESVGSKSYRMPVGK 0.94999216 81.67		VDLGGYESVGSKSYRMPVGK 1.1895891 89.65		GIYVDLGGYESVGSKSYRMPVGKCP 0.12212472 54.07		GSGIYVDLGGYESVGSKSYRMPVGKCPVVG 0.51930075 67.31		GSGIYVDLGGYESVGSKSYRMPVGKCPVVG 0.18288842 56.10
DLGGYESVGSKSYRMPVGKC 0.84340943 78.11		DLGGYESVGSKSYRMPVGKC 0.94145284 81.38		IYVDLGGYESVGSKSYRMPVGKCPV 0.15512282 55.17		SGIYVDLGGYESVGSKSYRMPVGKCPVVGK 0.56439644 68.81		SGIYVDLGGYESVGSKSYRMPVGKCPVVGK 0.19436911 56.48
LGGYESVGSKSYRMPVGKCP 0.64893836 71.63		LGGYESVGSKSYRMPVGKCP 0.7396985 74.66		YVDLGGYESVGSKSYRMPVGKCPVV 0.39652253 63.22		GIYVDLGGYESVGSKSYRMPVGKCPVVGKI 0.52132164 67.38		GIYVDLGGYESVGSKSYRMPVGKCPVVGKI 0.12218309 54.07
GGYESVGSKSYRMPVGKCPV 0.57420581 69.14		GGYESVGSKSYRMPVGKCPV 0.70595747 73.53		VDLGGYESVGSKSYRMPVGKCPVVG 0.28262208 59.42		IYVDLGGYESVGSKSYRMPVGKCPVVGKII 0.67240987 72.41		IYVDLGGYESVGSKSYRMPVGKCPVVGKII 0.067740744 52.26
GYESVGSKSYRMPVGKCPVV 0.96543819 82.18		GYESVGSKSYRMPVGKCPVV 1.0672147 85.57		DLGGYESVGSKSYRMPVGKCPVVGK 0.11538756 53.85		YVDLGGYESVGSKSYRMPVGKCPVVGKIID 0.80335666 76.78		YVDLGGYESVGSKSYRMPVGKCPVVGKIID 0.092918806 53.10
YESVGSKSYRMPVGKCPVVG 0.64189094 71.40		YESVGSKSYRMPVGKCPVVG 0.6900536 73.00		LGGYESVGSKSYRMPVGKCPVVGKI 0.035416733 51.18		VDLGGYESVGSKSYRMPVGKCPVVGKIIDL 0.84077993 78.03		VDLGGYESVGSKSYRMPVGKCPVVGKIIDL 0.14800758 54.93
ESVGSKSYRMPVGKCPVVGK 0.74785494 74.93		ESVGSKSYRMPVGKCPVVGK 0.81480817 77.16		GGYESVGSKSYRMPVGKCPVVGKII 0.037465421 51.25		DLGGYESVGSKSYRMPVGKCPVVGKIIDLG 0.83483133 77.83		DLGGYESVGSKSYRMPVGKCPVVGKIIDLG 0.10978289 53.66
SVGSKSYRMPVGKCPVVGKI 0.48751231 66.25		SVGSKSYRMPVGKCPVVGKI 0.53210968 67.74		GYESVGSKSYRMPVGKCPVVGKIID 0.057412468 51.91		LGGYESVGSKSYRMPVGKCPVVGKIIDLGN 0.86576439 78.86		LGGYESVGSKSYRMPVGKCPVVGKIIDLGN -0.01624409 49.46
VGSKSYRMPVGKCPVVGKII 0.30115369 60.04		VGSKSYRMPVGKCPVVGKII 0.27626402 59.21		YESVGSKSYRMPVGKCPVVGKIIDL -0.076470022 47.45		GGYESVGSKSYRMPVGKCPVVGKIIDLGNG 0.73706426 74.57		GGYESVGSKSYRMPVGKCPVVGKIIDLGNG -0.077481314 47.42
GSKSYRMPVGKCPVVGKIID 0.24515931 58.17		GSKSYRMPVGKCPVVGKIID 0.18578133 56.19		ESVGSKSYRMPVGKCPVVGKIIDLG 0.038871007 51.30		GYESVGSKSYRMPVGKCPVVGKIIDLGNGA 0.63482442 71.16		GYESVGSKSYRMPVGKCPVVGKIIDLGNGA -0.1265792 45.78
SKSYRMPVGKCPVVGKIIDL 0.25982357 58.66		SKSYRMPVGKCPVVGKIIDL 0.28191897 59.40		SVGSKSYRMPVGKCPVVGKIIDLGN -0.034557244 48.85		YESVGSKSYRMPVGKCPVVGKIIDLGNGAD 0.41430692 63.81		YESVGSKSYRMPVGKCPVVGKIIDLGNGAD -0.41171691 36.28
KSYRMPVGKCPVVGKIIDLG 0.18852194 56.28		KSYRMPVGKCPVVGKIIDLG 0.012536891 50.42		VGSKSYRMPVGKCPVVGKIIDLGNG -0.16805508 44.40		ESVGSKSYRMPVGKCPVVGKIIDLGNGADF 0.41425623 63.81		ESVGSKSYRMPVGKCPVVGKIIDLGNGADF -0.44460063 35.18
SYRMPVGKCPVVGKIIDLGN -0.079542809 47.35		SYRMPVGKCPVVGKIIDLGN -0.16698961 44.43		GSKSYRMPVGKCPVVGKIIDLGNGA -0.1860056 43.80		SVGSKSYRMPVGKCPVVGKIIDLGNGADFL 0.25718106 58.57		SVGSKSYRMPVGKCPVVGKIIDLGNGADFL -0.46461392 34.51
YRMPVGKCPVVGKIIDLGNG -0.049835422 48.34		YRMPVGKCPVVGKIIDLGNG -0.29088085 40.30		SKSYRMPVGKCPVVGKIIDLGNGAD -0.207156 43.09		VGSKSYRMPVGKCPVVGKIIDLGNGADFLD 0.23573034 57.86		VGSKSYRMPVGKCPVVGKIIDLGNGADFLD -0.46343418 34.55
RMPVGKCPVVGKIIDLGNGA -0.33555186 38.81		RMPVGKCPVVGKIIDLGNGA -0.46957543 34.35		KSYRMPVGKCPVVGKIIDLGNGADF -0.37747749 37.42		GSKSYRMPVGKCPVVGKIIDLGNGADFLDP 0.41989583 64.00		GSKSYRMPVGKCPVVGKIIDLGNGADFLDP -0.31442101 39.52
MPVGKCPVVGKIIDLGNGAD -0.41700802 36.10		MPVGKCPVVGKIIDLGNGAD -0.41713132 36.10		SYRMPVGKCPVVGKIIDLGNGADFL -0.54858987 31.71		SKSYRMPVGKCPVVGKIIDLGNGADFLDPI 0.54354132 68.12		SKSYRMPVGKCPVVGKIIDLGNGADFLDPI -0.37139351 37.62
PVGKCPVVGKIIDLGNGADF -0.48757869 33.75		PVGKCPVVGKIIDLGNGADF -0.46809138 34.40		YRMPVGKCPVVGKIIDLGNGADFLD -0.60950857 29.68		KSYRMPVGKCPVVGKIIDLGNGADFLDPIS 0.35326548 61.78		KSYRMPVGKCPVVGKIIDLGNGADFLDPIS -0.45361124 34.88
VGKCPVVGKIIDLGNGADFL -0.67569082 27.48		VGKCPVVGKIIDLGNGADFL -0.64884189 28.37		RMPVGKCPVVGKIIDLGNGADFLDP -0.4839628 33.87		SYRMPVGKCPVVGKIIDLGNGADFLDPISS 0.46537544 65.51		SYRMPVGKCPVVGKIIDLGNGADFLDPISS -0.33938548 38.69
GKCPVVGKIIDLGNGADFLD -0.6649508 27.83		GKCPVVGKIIDLGNGADFLD -0.54420059 31.86		MPVGKCPVVGKIIDLGNGADFLDPI -0.35868701 38.04		YRMPVGKCPVVGKIIDLGNGADFLDPISSE 0.29193029 59.73		YRMPVGKCPVVGKIIDLGNGADFLDPISSE -0.40159122 36.61
KCPVVGKIIDLGNGADFLDP -0.63826446 28.72		KCPVVGKIIDLGNGADFLDP -0.55037377 31.65		PVGKCPVVGKIIDLGNGADFLDPIS -0.41250694 36.25		RMPVGKCPVVGKIIDLGNGADFLDPISSED 0.23673372 57.89		RMPVGKCPVVGKIIDLGNGADFLDPISSED -0.25052663 41.65
CPVVGKIIDLGNGADFLDPI -0.55216455 31.59		CPVVGKIIDLGNGADFLDPI -0.3225141 39.25		VGKCPVVGKIIDLGNGADFLDPISS -0.059014766 48.03		MPVGKCPVVGKIIDLGNGADFLDPISSEDP 0.44065768 64.69		MPVGKCPVVGKIIDLGNGADFLDPISSEDP -0.098031843 46.73
PVVGKIIDLGNGADFLDPIS -0.40776071 36.41		PVVGKIIDLGNGADFLDPIS -0.21079929 42.97		GKCPVVGKIIDLGNGADFLDPISSE 0.15348762 55.12		PVGKCPVVGKIIDLGNGADFLDPISSEDPS 0.53799668 67.93		PVGKCPVVGKIIDLGNGADFLDPISSEDPS 0.072065362 52.40
VVGKIIDLGNGADFLDPISS -0.1589556 44.70		VVGKIIDLGNGADFLDPISS 0.10216177 53.41		KCPVVGKIIDLGNGADFLDPISSED 0.20598878 56.87		VGKCPVVGKIIDLGNGADFLDPISSEDPSY 0.82855922 77.62		VGKCPVVGKIIDLGNGADFLDPISSEDPSY 0.16358196 55.45
VGKIIDLGNGADFLDPISSE -0.26172112 41.28		VGKIIDLGNGADFLDPISSE 0.029189857 50.97		CPVVGKIIDLGNGADFLDPISSEDP 0.31635266 60.55		GKCPVVGKIIDLGNGADFLDPISSEDPSYR 0.96022688 82.01		GKCPVVGKIIDLGNGADFLDPISSEDPSYR 0.23070694 57.69
GKIIDLGNGADFLDPISSED -0.14519393 45.16		GKIIDLGNGADFLDPISSED -0.053502196 48.22		PVVGKIIDLGNGADFLDPISSEDPS 0.63716512 71.24		KCPVVGKIIDLGNGADFLDPISSEDPSYRG 1.0301529 84.34		KCPVVGKIIDLGNGADFLDPISSEDPSYRG 0.22168197 57.39
KIIDLGNGADFLDPISSEDP -0.067845907 47.74		KIIDLGNGADFLDPISSEDP -0.22726512 42.42		VVGKIIDLGNGADFLDPISSEDPSY 0.92745825 80.92		CPVVGKIIDLGNGADFLDPISSEDPSYRGL 0.91521658 80.51		CPVVGKIIDLGNGADFLDPISSEDPSYRGL 0.17968468 55.99
IIDLGNGADFLDPISSEDPS 0.076183418 52.54		IIDLGNGADFLDPISSEDPS -0.21335267 42.89		VGKIIDLGNGADFLDPISSEDPSYR 0.82716481 77.57		PVVGKIIDLGNGADFLDPISSEDPSYRGLA 1.1543885 88.48		PVVGKIIDLGNGADFLDPISSEDPSYRGLA 0.15461804 55.15
IDLGNGADFLDPISSEDPSY 0.42180215 64.06		IDLGNGADFLDPISSEDPSY 0.10881743 53.63		GKIIDLGNGADFLDPISSEDPSYRG 0.95863981 81.95		VVGKIIDLGNGADFLDPISSEDPSYRGLAF 1.2334776 91.12		VVGKIIDLGNGADFLDPISSEDPSYRGLAF 0.20993778 57.00
DLGNGADFLDPISSEDPSYR 0.43730826 64.58		DLGNGADFLDPISSEDPSYR -0.041075246 48.63		KIIDLGNGADFLDPISSEDPSYRGL 0.98487061 82.83		VGKIIDLGNGADFLDPISSEDPSYRGLAFP 1.1569477 88.56		VGKIIDLGNGADFLDPISSEDPSYRGLAFP 0.079182405 52.64
LGNGADFLDPISSEDPSYRG 0.37964463 62.65		LGNGADFLDPISSEDPSYRG 0.097515105 53.25		IIDLGNGADFLDPISSEDPSYRGLA 1.1277575 87.59		GKIIDLGNGADFLDPISSEDPSYRGLAFPE 1.2577748 91.93		GKIIDLGNGADFLDPISSEDPSYRGLAFPE 0.22275592 57.43
GNGADFLDPISSEDPSYRGL 0.45218781 65.07		GNGADFLDPISSEDPSYRGL 0.15530895 55.18		IDLGNGADFLDPISSEDPSYRGLAF 1.2750509 92.50		KIIDLGNGADFLDPISSEDPSYRGLAFPET 1.1874483 89.58		KIIDLGNGADFLDPISSEDPSYRGLAFPET 0.22907087 57.64
NGADFLDPISSEDPSYRGLA 0.35252952 61.75		NGADFLDPISSEDPSYRGLA 0.091530897 53.05		DLGNGADFLDPISSEDPSYRGLAFP 1.1232774 87.44		IIDLGNGADFLDPISSEDPSYRGLAFPETA 1.3659085 95.53		IIDLGNGADFLDPISSEDPSYRGLAFPETA 0.30686003 60.23
GADFLDPISSEDPSYRGLAF 0.51129017 67.04		GADFLDPISSEDPSYRGLAF 0.25655931 58.55		LGNGADFLDPISSEDPSYRGLAFPE 0.9792396 82.64		IDLGNGADFLDPISSEDPSYRGLAFPETAV 1.4755017 99.18		IDLGNGADFLDPISSEDPSYRGLAFPETAV 0.33381265 61.13
ADFLDPISSEDPSYRGLAFP 0.63959728 71.32		ADFLDPISSEDPSYRGLAFP 0.18694745 56.23		GNGADFLDPISSEDPSYRGLAFPET 0.88254979 79.42		DLGNGADFLDPISSEDPSYRGLAFPETAVD 1.2995403 93.32		DLGNGADFLDPISSEDPSYRGLAFPETAVD 0.49636811 66.55
DFLDPISSEDPSYRGLAFPE 0.70234116 73.41		DFLDPISSEDPSYRGLAFPE 0.29311489 59.77		NGADFLDPISSEDPSYRGLAFPETA 1.0056253 83.52		LGNGADFLDPISSEDPSYRGLAFPETAVDS 0.94095892 81.37		LGNGADFLDPISSEDPSYRGLAFPETAVDS 0.40490045 63.50
FLDPISSEDPSYRGLAFPET 0.65544364 71.85		FLDPISSEDPSYRGLAFPET 0.46098749 65.37		GADFLDPISSEDPSYRGLAFPETAV 0.97434605 82.48		GNGADFLDPISSEDPSYRGLAFPETAVDSN 0.83142893 77.71		GNGADFLDPISSEDPSYRGLAFPETAVDSN 0.29852594 59.95
LDPISSEDPSYRGLAFPETA 0.71732413 73.91		LDPISSEDPSYRGLAFPETA 0.54965062 68.32		ADFLDPISSEDPSYRGLAFPETAVD 0.98137585 82.71		NGADFLDPISSEDPSYRGLAFPETAVDSNI 0.78367556 76.12		NGADFLDPISSEDPSYRGLAFPETAVDSNI 0.46465544 65.49
DPISSEDPSYRGLAFPETAV 0.66285643 72.10		DPISSEDPSYRGLAFPETAV 0.34055526 61.35		DFLDPISSEDPSYRGLAFPETAVDS 0.73761121 74.59		GADFLDPISSEDPSYRGLAFPETAVDSNIP 0.79186429 76.40		GADFLDPISSEDPSYRGLAFPETAVDSNIP 0.50878864 66.96
PISSEDPSYRGLAFPETAVD 0.62694244 70.90		PISSEDPSYRGLAFPETAVD 0.48401886 66.13		FLDPISSEDPSYRGLAFPETAVDSN 0.78985152 76.33		ADFLDPISSEDPSYRGLAFPETAVDSNIPT 0.88578243 79.53		ADFLDPISSEDPSYRGLAFPETAVDSNIPT 0.67259822 72.42
ISSEDPSYRGLAFPETAVDS 0.44061325 64.69		ISSEDPSYRGLAFPETAVDS 0.34781064 61.59		LDPISSEDPSYRGLAFPETAVDSNI 0.67523258 72.51		DFLDPISSEDPSYRGLAFPETAVDSNIPTQ 0.82400655 77.47		DFLDPISSEDPSYRGLAFPETAVDSNIPTQ 0.76785747 75.60
SSEDPSYRGLAFPETAVDSN 0.45517566 65.17		SSEDPSYRGLAFPETAVDSN 0.57362693 69.12		DPISSEDPSYRGLAFPETAVDSNIP 0.59292908 69.76		FLDPISSEDPSYRGLAFPETAVDSNIPTQP 0.86292856 78.76		FLDPISSEDPSYRGLAFPETAVDSNIPTQP 0.77993543 76.00
SEDPSYRGLAFPETAVDSNI 0.25848944 58.62		SEDPSYRGLAFPETAVDSNI 0.37431994 62.48		PISSEDPSYRGLAFPETAVDSNIPT 0.53581942 67.86		LDPISSEDPSYRGLAFPETAVDSNIPTQPK 0.93872041 81.29		LDPISSEDPSYRGLAFPETAVDSNIPTQPK 0.88295555 79.43
EDPSYRGLAFPETAVDSNIP 0.43692948 64.56		EDPSYRGLAFPETAVDSNIP 0.58804979 69.60		ISSEDPSYRGLAFPETAVDSNIPTQ 0.53138361 67.71		DPISSEDPSYRGLAFPETAVDSNIPTQPKT 0.92971932 80.99		DPISSEDPSYRGLAFPETAVDSNIPTQPKT 0.88753776 79.58
DPSYRGLAFPETAVDSNIPT 0.17873877 55.96		DPSYRGLAFPETAVDSNIPT 0.33323921 61.11		SSEDPSYRGLAFPETAVDSNIPTQP 0.51770674 67.26		PISSEDPSYRGLAFPETAVDSNIPTQPKTR 0.91087559 80.36		PISSEDPSYRGLAFPETAVDSNIPTQPKTR 0.90433957 80.14
PSYRGLAFPETAVDSNIPTQ 0.094732884 53.16		PSYRGLAFPETAVDSNIPTQ 0.40178333 63.39		SEDPSYRGLAFPETAVDSNIPTQPK 0.3864421 62.88		ISSEDPSYRGLAFPETAVDSNIPTQPKTRG 0.89386526 79.80		ISSEDPSYRGLAFPETAVDSNIPTQPKTRG 0.92975704 80.99
SYRGLAFPETAVDSNIPTQP 0.046154989 51.54		SYRGLAFPETAVDSNIPTQP 0.17359938 55.79		EDPSYRGLAFPETAVDSNIPTQPKT 0.5090204 66.97		SSEDPSYRGLAFPETAVDSNIPTQPKTRGS 0.87312957 79.10		SSEDPSYRGLAFPETAVDSNIPTQPKTRGS 1.0312467 84.37
YRGLAFPETAVDSNIPTQPK 0.17598381 55.87		YRGLAFPETAVDSNIPTQPK 0.091938191 53.06		DPSYRGLAFPETAVDSNIPTQPKTR 0.35243244 61.75		SEDPSYRGLAFPETAVDSNIPTQPKTRGSS 0.87312957 79.10		SEDPSYRGLAFPETAVDSNIPTQPKTRGSS 1.0312467 84.37
RGLAFPETAVDSNIPTQPKT 0.2307631 57.69		RGLAFPETAVDSNIPTQPKT -0.035876273 48.80		PSYRGLAFPETAVDSNIPTQPKTRG 0.25613809 58.54		EDPSYRGLAFPETAVDSNIPTQPKTRGSSS 1.0566124 85.22		EDPSYRGLAFPETAVDSNIPTQPKTRGSSS 1.0984897 86.62
GLAFPETAVDSNIPTQPKTR 0.29602525 59.87		GLAFPETAVDSNIPTQPKTR 0.11063065 53.69		SYRGLAFPETAVDSNIPTQPKTRGS 0.21073516 57.02		DPSYRGLAFPETAVDSNIPTQPKTRGSSSV 0.93519492 81.17		DPSYRGLAFPETAVDSNIPTQPKTRGSSSV 0.82890941 77.63
LAFPETAVDSNIPTQPKTRG 0.26738153 58.91		LAFPETAVDSNIPTQPKTRG 0.032700113 51.09		YRGLAFPETAVDSNIPTQPKTRGSS 0.32048889 60.68		PSYRGLAFPETAVDSNIPTQPKTRGSSSVT 0.8621466 78.74		PSYRGLAFPETAVDSNIPTQPKTRGSSSVT 0.70737459 73.58
AFPETAVDSNIPTQPKTRGS 0.48439367 66.15		AFPETAVDSNIPTQPKTRGS 0.17722174 55.91		RGLAFPETAVDSNIPTQPKTRGSSS 0.40435063 63.48		SYRGLAFPETAVDSNIPTQPKTRGSSSVTA 0.98601788 82.87		SYRGLAFPETAVDSNIPTQPKTRGSSSVTA 0.57768978 69.26
FPETAVDSNIPTQPKTRGSS 0.6234729 70.78		FPETAVDSNIPTQPKTRGSS 0.4146373 63.82		GLAFPETAVDSNIPTQPKTRGSSSV 0.43080332 64.36		YRGLAFPETAVDSNIPTQPKTRGSSSVTAA 0.77003604 75.67		YRGLAFPETAVDSNIPTQPKTRGSSSVTAA 0.62703614 70.90
PETAVDSNIPTQPKTRGSSS 0.73080207 74.36		PETAVDSNIPTQPKTRGSSS 0.7086027 73.62		LAFPETAVDSNIPTQPKTRGSSSVT 0.41776069 63.93		RGLAFPETAVDSNIPTQPKTRGSSSVTAAK 0.82976491 77.66		RGLAFPETAVDSNIPTQPKTRGSSSVTAAK 0.55382327 68.46
ETAVDSNIPTQPKTRGSSSV 0.56248554 68.75		ETAVDSNIPTQPKTRGSSSV 0.38495456 62.83		AFPETAVDSNIPTQPKTRGSSSVTA 0.55080376 68.36		GLAFPETAVDSNIPTQPKTRGSSSVTAAKL 0.76791858 75.60		GLAFPETAVDSNIPTQPKTRGSSSVTAAKL 0.60980383 70.33
TAVDSNIPTQPKTRGSSSVT 0.56466458 68.82		TAVDSNIPTQPKTRGSSSVT 0.46125169 65.38		FPETAVDSNIPTQPKTRGSSSVTAA 0.36995584 62.33		LAFPETAVDSNIPTQPKTRGSSSVTAAKLS 0.66677193 72.23		LAFPETAVDSNIPTQPKTRGSSSVTAAKLS 0.64099581 71.37
AVDSNIPTQPKTRGSSSVTA 0.56466458 68.82		AVDSNIPTQPKTRGSSSVTA 0.46125169 65.38		PETAVDSNIPTQPKTRGSSSVTAAK 0.40386094 63.46		AFPETAVDSNIPTQPKTRGSSSVTAAKLSP 0.65340255 71.78		AFPETAVDSNIPTQPKTRGSSSVTAAKLSP 0.81959083 77.32
VDSNIPTQPKTRGSSSVTAA 0.34042826 61.35		VDSNIPTQPKTRGSSSVTAA 0.15035816 55.01		ETAVDSNIPTQPKTRGSSSVTAAKL 0.33693472 61.23		FPETAVDSNIPTQPKTRGSSSVTAAKLSPV 0.73014448 74.34		FPETAVDSNIPTQPKTRGSSSVTAAKLSPV 0.8039975 76.80
DSNIPTQPKTRGSSSVTAAK 0.28064349 59.35		DSNIPTQPKTRGSSSVTAAK -0.14708175 45.10		TAVDSNIPTQPKTRGSSSVTAAKLS 0.13708495 54.57		PETAVDSNIPTQPKTRGSSSVTAAKLSPVS 0.84657539 78.22		PETAVDSNIPTQPKTRGSSSVTAAKLSPVS 0.83935563 77.98
SNIPTQPKTRGSSSVTAAKL 0.45969571 65.32		SNIPTQPKTRGSSSVTAAKL 0.042007165 51.40		AVDSNIPTQPKTRGSSSVTAAKLSP 0.10434363 53.48		ETAVDSNIPTQPKTRGSSSVTAAKLSPVSA 0.78461465 76.15		ETAVDSNIPTQPKTRGSSSVTAAKLSPVSA 0.69275665 73.09
NIPTQPKTRGSSSVTAAKLS 0.13683347 54.56		NIPTQPKTRGSSSVTAAKLS -0.4005635 36.65		VDSNIPTQPKTRGSSSVTAAKLSPV 0.12961516 54.32		TAVDSNIPTQPKTRGSSSVTAAKLSPVSAK 0.92996861 81.00		TAVDSNIPTQPKTRGSSSVTAAKLSPVSAK 0.58709765 69.57
IPTQPKTRGSSSVTAAKLSP 0.041282509 51.38		IPTQPKTRGSSSVTAAKLSP -0.48505391 33.83		DSNIPTQPKTRGSSSVTAAKLSPVS 0.30490929 60.16		AVDSNIPTQPKTRGSSSVTAAKLSPVSAKD 0.98213752 82.74		AVDSNIPTQPKTRGSSSVTAAKLSPVSAKD 0.72235142 74.08
PTQPKTRGSSSVTAAKLSPV 0.32417619 60.81		PTQPKTRGSSSVTAAKLSPV -0.26434622 41.19		SNIPTQPKTRGSSSVTAAKLSPVSA 0.376684 62.56		VDSNIPTQPKTRGSSSVTAAKLSPVSAKDL 0.99352184 83.12		VDSNIPTQPKTRGSSSVTAAKLSPVSAKDL 0.91680531 80.56
TQPKTRGSSSVTAAKLSPVS 0.4786635 65.96		TQPKTRGSSSVTAAKLSPVS 0.030184756 51.01		NIPTQPKTRGSSSVTAAKLSPVSAK 0.46218816 65.41		DSNIPTQPKTRGSSSVTAAKLSPVSAKDLR 0.85979171 78.66		DSNIPTQPKTRGSSSVTAAKLSPVSAKDLR 0.88100944 79.37
QPKTRGSSSVTAAKLSPVSA 0.62002551 70.67		QPKTRGSSSVTAAKLSPVSA 0.38141169 62.71		IPTQPKTRGSSSVTAAKLSPVSAKD 0.45940428 65.31		SNIPTQPKTRGSSSVTAAKLSPVSAKDLRR 0.93914561 81.30		SNIPTQPKTRGSSSVTAAKLSPVSAKDLRR 1.0262295 84.21
PKTRGSSSVTAAKLSPVSAK 0.82012389 77.34		PKTRGSSSVTAAKLSPVSAK 0.60159078 70.05		PTQPKTRGSSSVTAAKLSPVSAKDL 0.47855466 65.95		NIPTQPKTRGSSSVTAAKLSPVSAKDLRRW 0.98515653 82.84		NIPTQPKTRGSSSVTAAKLSPVSAKDLRRW 1.1163238 87.21
KTRGSSSVTAAKLSPVSAKD 1.0450219 84.83		KTRGSSSVTAAKLSPVSAKD 1.0157662 83.86		TQPKTRGSSSVTAAKLSPVSAKDLR 0.5017726 66.73		IPTQPKTRGSSSVTAAKLSPVSAKDLRRWG 1.053358 85.11		IPTQPKTRGSSSVTAAKLSPVSAKDLRRWG 1.0117928 83.73
TRGSSSVTAAKLSPVSAKDL 1.0993856 86.65		TRGSSSVTAAKLSPVSAKDL 0.80990682 77.00		QPKTRGSSSVTAAKLSPVSAKDLRR 0.57109086 69.04		PTQPKTRGSSSVTAAKLSPVSAKDLRRWGY 0.97800465 82.60		PTQPKTRGSSSVTAAKLSPVSAKDLRRWGY 0.99345662 83.12
RGSSSVTAAKLSPVSAKDLR 0.82332697 77.44		RGSSSVTAAKLSPVSAKDLR 0.65117312 71.71		PKTRGSSSVTAAKLSPVSAKDLRRW 0.56669788 68.89		TQPKTRGSSSVTAAKLSPVSAKDLRRWGYE 1.0434398 84.78		TQPKTRGSSSVTAAKLSPVSAKDLRRWGYE 1.0215661 84.05
GSSSVTAAKLSPVSAKDLRR 0.80259478 76.75		GSSSVTAAKLSPVSAKDLRR 0.61258594 70.42		KTRGSSSVTAAKLSPVSAKDLRRWG 0.81956494 77.32		QPKTRGSSSVTAAKLSPVSAKDLRRWGYEG 1.1299252 87.66		QPKTRGSSSVTAAKLSPVSAKDLRRWGYEG 1.2747881 92.49
SSSVTAAKLSPVSAKDLRRW 0.71508775 73.84		SSSVTAAKLSPVSAKDLRRW 0.59435296 69.81		TRGSSSVTAAKLSPVSAKDLRRWGY 0.74843709 74.95		PKTRGSSSVTAAKLSPVSAKDLRRWGYEGN 1.1632903 88.78		PKTRGSSSVTAAKLSPVSAKDLRRWGYEGN 1.0926149 86.42
SSVTAAKLSPVSAKDLRRWG 0.81820522 77.27		SSVTAAKLSPVSAKDLRRWG 0.60531439 70.18		RGSSSVTAAKLSPVSAKDLRRWGYE 0.59257263 69.75		KTRGSSSVTAAKLSPVSAKDLRRWGYEGND 1.1664529 88.88		KTRGSSSVTAAKLSPVSAKDLRRWGYEGND 1.1017577 86.73
SVTAAKLSPVSAKDLRRWGY 0.80909606 76.97		SVTAAKLSPVSAKDLRRWGY 0.58039947 69.35		GSSSVTAAKLSPVSAKDLRRWGYEG 0.69004229 73.00		TRGSSSVTAAKLSPVSAKDLRRWGYEGNDV 1.2508306 91.69		TRGSSSVTAAKLSPVSAKDLRRWGYEGNDV 1.0898796 86.33
VTAAKLSPVSAKDLRRWGYE 0.73921882 74.64		VTAAKLSPVSAKDLRRWGYE 0.53944377 67.98		SSSVTAAKLSPVSAKDLRRWGYEGN 0.90466751 80.16		RGSSSVTAAKLSPVSAKDLRRWGYEGNDVA 1.2354569 91.18		RGSSSVTAAKLSPVSAKDLRRWGYEGNDVA 0.99528847 83.18
TAAKLSPVSAKDLRRWGYEG 0.81440639 77.15		TAAKLSPVSAKDLRRWGYEG 0.41145278 63.72		SSVTAAKLSPVSAKDLRRWGYEGND 1.096957 86.57		GSSSVTAAKLSPVSAKDLRRWGYEGNDVAN 1.1539792 88.47		GSSSVTAAKLSPVSAKDLRRWGYEGNDVAN 0.87926037 79.31
AAKLSPVSAKDLRRWGYEGN 1.0049294 83.50		AAKLSPVSAKDLRRWGYEGN 0.59161997 69.72		SVTAAKLSPVSAKDLRRWGYEGNDV 1.2050997 90.17		SSSVTAAKLSPVSAKDLRRWGYEGNDVANC 1.3107204 93.69		SSSVTAAKLSPVSAKDLRRWGYEGNDVANC 0.8447165 78.16
AKLSPVSAKDLRRWGYEGND 0.6617828 72.06		AKLSPVSAKDLRRWGYEGND 0.46415771 65.47		VTAAKLSPVSAKDLRRWGYEGNDVA 1.3166601 93.89		SSVTAAKLSPVSAKDLRRWGYEGNDVANCS 1.4286701 97.62		SSVTAAKLSPVSAKDLRRWGYEGNDVANCS 0.84271082 78.09
KLSPVSAKDLRRWGYEGNDV 0.48582314 66.19		KLSPVSAKDLRRWGYEGNDV 0.52715339 67.57		TAAKLSPVSAKDLRRWGYEGNDVAN 1.439817 97.99		SVTAAKLSPVSAKDLRRWGYEGNDVANCSE 1.2679017 92.26		SVTAAKLSPVSAKDLRRWGYEGNDVANCSE 0.69618414 73.21
LSPVSAKDLRRWGYEGNDVA 0.38135707 62.71		LSPVSAKDLRRWGYEGNDVA 0.53433479 67.81		AAKLSPVSAKDLRRWGYEGNDVANC 1.4706573 99.02		VTAAKLSPVSAKDLRRWGYEGNDVANCSEY 1.275434 92.51		VTAAKLSPVSAKDLRRWGYEGNDVANCSEY 0.72405035 74.14
SPVSAKDLRRWGYEGNDVAN 0.34753119 61.58		SPVSAKDLRRWGYEGNDVAN 0.54514015 68.17		AKLSPVSAKDLRRWGYEGNDVANCS 1.3749423 95.83		TAAKLSPVSAKDLRRWGYEGNDVANCSEYA 1.3075645 93.59		TAAKLSPVSAKDLRRWGYEGNDVANCSEYA 0.71016302 73.67
PVSAKDLRRWGYEGNDVANC 0.39093919 63.03		PVSAKDLRRWGYEGNDVANC 0.37708724 62.57		KLSPVSAKDLRRWGYEGNDVANCSE 1.2315477 91.05		AAKLSPVSAKDLRRWGYEGNDVANCSEYAS 1.1799012 89.33		AAKLSPVSAKDLRRWGYEGNDVANCSEYAS 0.70106944 73.37
VSAKDLRRWGYEGNDVANCS 0.35842001 61.95		VSAKDLRRWGYEGNDVANCS 0.26573173 58.86		LSPVSAKDLRRWGYEGNDVANCSEY 1.0845111 86.15		AKLSPVSAKDLRRWGYEGNDVANCSEYASN 0.99817369 83.27		AKLSPVSAKDLRRWGYEGNDVANCSEYASN 0.58961579 69.65
SAKDLRRWGYEGNDVANCSE 0.18756791 56.25		SAKDLRRWGYEGNDVANCSE -0.06176835 47.94		SPVSAKDLRRWGYEGNDVANCSEYA 1.1391651 87.97		KLSPVSAKDLRRWGYEGNDVANCSEYASNL 1.0179367 83.93		KLSPVSAKDLRRWGYEGNDVANCSEYASNL 0.67397988 72.47
AKDLRRWGYEGNDVANCSEY 0.23363794 57.79		AKDLRRWGYEGNDVANCSEY 0.0134436 50.45		PVSAKDLRRWGYEGNDVANCSEYAS 0.99291691 83.10		LSPVSAKDLRRWGYEGNDVANCSEYASNLI 0.88367623 79.46		LSPVSAKDLRRWGYEGNDVANCSEYASNLI 0.6692937 72.31
KDLRRWGYEGNDVANCSEYA 0.085112812 52.84		KDLRRWGYEGNDVANCSEYA 0.3161521 60.54		VSAKDLRRWGYEGNDVANCSEYASN 0.7531252 75.10		SPVSAKDLRRWGYEGNDVANCSEYASNLIP 0.94730117 81.58		SPVSAKDLRRWGYEGNDVANCSEYASNLIP 0.66150996 72.05
DLRRWGYEGNDVANCSEYAS -0.040196431 48.66		DLRRWGYEGNDVANCSEYAS -0.12015156 45.99		SAKDLRRWGYEGNDVANCSEYASNL 0.60361019 70.12		PVSAKDLRRWGYEGNDVANCSEYASNLIPA 1.0432404 84.77		PVSAKDLRRWGYEGNDVANCSEYASNLIPA 0.53678374 67.89
LRRWGYEGNDVANCSEYASN -0.16501397 44.50		LRRWGYEGNDVANCSEYASN -0.17685941 44.10		AKDLRRWGYEGNDVANCSEYASNLI 0.61863241 70.62		VSAKDLRRWGYEGNDVANCSEYASNLIPAS 0.75527561 75.18		VSAKDLRRWGYEGNDVANCSEYASNLIPAS 0.60479902 70.16
RRWGYEGNDVANCSEYASNL -0.16518928 44.49		RRWGYEGNDVANCSEYASNL -0.065344928 47.82		KDLRRWGYEGNDVANCSEYASNLIP 0.72844966 74.28		SAKDLRRWGYEGNDVANCSEYASNLIPASD 0.77067155 75.69		SAKDLRRWGYEGNDVANCSEYASNLIPASD 0.79537601 76.51
RWGYEGNDVANCSEYASNLI -0.46182931 34.61		RWGYEGNDVANCSEYASNLI -0.24940794 41.69		DLRRWGYEGNDVANCSEYASNLIPA 0.83582343 77.86		AKDLRRWGYEGNDVANCSEYASNLIPASDK 0.86243795 78.75		AKDLRRWGYEGNDVANCSEYASNLIPASDK 0.78673183 76.22
WGYEGNDVANCSEYASNLIP -0.59914674 30.03		WGYEGNDVANCSEYASNLIP -0.33452597 38.85		LRRWGYEGNDVANCSEYASNLIPAS 0.66230471 72.08		KDLRRWGYEGNDVANCSEYASNLIPASDKT 0.94508029 81.50		KDLRRWGYEGNDVANCSEYASNLIPASDKT 0.7751359 75.84
GYEGNDVANCSEYASNLIPA -0.79977473 23.34		GYEGNDVANCSEYASNLIPA -0.52774469 32.41		RRWGYEGNDVANCSEYASNLIPASD 0.83060927 77.69		DLRRWGYEGNDVANCSEYASNLIPASDKTT 0.812215 77.07		DLRRWGYEGNDVANCSEYASNLIPASDKTT 0.73363268 74.45
YEGNDVANCSEYASNLIPAS -0.77698466 24.10		YEGNDVANCSEYASNLIPAS -0.5863549 30.45		RWGYEGNDVANCSEYASNLIPASDK 0.85145425 78.38		LRRWGYEGNDVANCSEYASNLIPASDKTTK 0.74960689 74.99		LRRWGYEGNDVANCSEYASNLIPASDKTTK 0.71708026 73.90
EGNDVANCSEYASNLIPASD -0.57600636 30.80		EGNDVANCSEYASNLIPASD -0.32312802 39.23		WGYEGNDVANCSEYASNLIPASDKT 0.89824738 79.94		RRWGYEGNDVANCSEYASNLIPASDKTTKY 1.0120765 83.74		RRWGYEGNDVANCSEYASNLIPASDKTTKY 0.79916514 76.64
GNDVANCSEYASNLIPASDK -0.34240829 38.59		GNDVANCSEYASNLIPASDK -0.28819148 40.39		GYEGNDVANCSEYASNLIPASDKTT 0.65821681 71.94		RWGYEGNDVANCSEYASNLIPASDKTTKYR 1.0044342 83.48		RWGYEGNDVANCSEYASNLIPASDKTTKYR 0.76120386 75.37
NDVANCSEYASNLIPASDKT -0.17073093 44.31		NDVANCSEYASNLIPASDKT 0.038746312 51.29		YEGNDVANCSEYASNLIPASDKTTK 0.61610564 70.54		WGYEGNDVANCSEYASNLIPASDKTTKYRY 0.9775192 82.58		WGYEGNDVANCSEYASNLIPASDKTTKYRY 0.76195764 75.40
DVANCSEYASNLIPASDKTT -0.25564462 41.48		DVANCSEYASNLIPASDKTT -0.18347613 43.88		EGNDVANCSEYASNLIPASDKTTKY 0.64606793 71.54		GYEGNDVANCSEYASNLIPASDKTTKYRYP 0.87065706 79.02		GYEGNDVANCSEYASNLIPASDKTTKYRYP 0.88196362 79.40
VANCSEYASNLIPASDKTTK -0.26261046 41.25		VANCSEYASNLIPASDKTTK 0.092815276 53.09		GNDVANCSEYASNLIPASDKTTKYR 0.83975676 77.99		YEGNDVANCSEYASNLIPASDKTTKYRYPF 0.72247284 74.08		YEGNDVANCSEYASNLIPASDKTTKYRYPF 0.77460038 75.82
ANCSEYASNLIPASDKTTKY -0.25219413 41.59		ANCSEYASNLIPASDKTTKY 0.13937579 54.65		NDVANCSEYASNLIPASDKTTKYRY 0.77134605 75.71		EGNDVANCSEYASNLIPASDKTTKYRYPFV 0.67465974 72.49		EGNDVANCSEYASNLIPASDKTTKYRYPFV 0.66102486 72.03
NCSEYASNLIPASDKTTKYR -0.32826323 39.06		NCSEYASNLIPASDKTTKYR 0.06371026 52.12		DVANCSEYASNLIPASDKTTKYRYP 0.64876181 71.63		GNDVANCSEYASNLIPASDKTTKYRYPFVF 0.81107287 77.04		GNDVANCSEYASNLIPASDKTTKYRYPFVF 0.54696486 68.23
CSEYASNLIPASDKTTKYRY -0.34739818 38.42		CSEYASNLIPASDKTTKYRY 0.074245785 52.47		VANCSEYASNLIPASDKTTKYRYPF 0.64101873 71.37		NDVANCSEYASNLIPASDKTTKYRYPFVFD 0.78160013 76.05		NDVANCSEYASNLIPASDKTTKYRYPFVFD 0.63885411 71.30
SEYASNLIPASDKTTKYRYP -0.42185309 35.94		SEYASNLIPASDKTTKYRYP 0.0028690841 50.10		ANCSEYASNLIPASDKTTKYRYPFV 0.67673283 72.56		DVANCSEYASNLIPASDKTTKYRYPFVFDS 0.60464837 70.15		DVANCSEYASNLIPASDKTTKYRYPFVFDS 0.59128481 69.71
EYASNLIPASDKTTKYRYPF -0.2485894 41.71		EYASNLIPASDKTTKYRYPF 0.10296179 53.43		NCSEYASNLIPASDKTTKYRYPFVF 0.76721845 75.57		VANCSEYASNLIPASDKTTKYRYPFVFDSD 0.61341843 70.45		VANCSEYASNLIPASDKTTKYRYPFVFDSD 0.67823042 72.61
YASNLIPASDKTTKYRYPFV -0.28660455 40.45		YASNLIPASDKTTKYRYPFV -0.078635956 47.38		CSEYASNLIPASDKTTKYRYPFVFD 0.64259976 71.42		ANCSEYASNLIPASDKTTKYRYPFVFDSDN 0.72906921 74.30		ANCSEYASNLIPASDKTTKYRYPFVFDSDN 0.65360212 71.79
ASNLIPASDKTTKYRYPFVF -0.097662497 46.74		ASNLIPASDKTTKYRYPFVF 0.13384282 54.46		SEYASNLIPASDKTTKYRYPFVFDS 0.42838584 64.28		NCSEYASNLIPASDKTTKYRYPFVFDSDNQ 0.76131698 75.38		NCSEYASNLIPASDKTTKYRYPFVFDSDNQ 0.80085716 76.70
SNLIPASDKTTKYRYPFVFD 0.015628188 50.52		SNLIPASDKTTKYRYPFVFD 0.12423643 54.14		EYASNLIPASDKTTKYRYPFVFDSD 0.47730388 65.91		CSEYASNLIPASDKTTKYRYPFVFDSDNQM 0.70166818 73.39		CSEYASNLIPASDKTTKYRYPFVFDSDNQM 0.63482712 71.16
NLIPASDKTTKYRYPFVFDS -0.10129388 46.62		NLIPASDKTTKYRYPFVFDS -0.066279668 47.79		YASNLIPASDKTTKYRYPFVFDSDN 0.25845368 58.62		SEYASNLIPASDKTTKYRYPFVFDSDNQMC 0.56627338 68.88		SEYASNLIPASDKTTKYRYPFVFDSDNQMC 0.66320611 72.11
LIPASDKTTKYRYPFVFDSD -0.2471227 41.76		LIPASDKTTKYRYPFVFDSD -0.30789471 39.74		ASNLIPASDKTTKYRYPFVFDSDNQ 0.29990162 60.00		EYASNLIPASDKTTKYRYPFVFDSDNQMCY 0.57590852 69.20		EYASNLIPASDKTTKYRYPFVFDSDNQMCY 0.78675012 76.23
IPASDKTTKYRYPFVFDSDN -0.080957718 47.30		IPASDKTTKYRYPFVFDSDN -0.27289197 40.90		SNLIPASDKTTKYRYPFVFDSDNQM 0.46894684 65.63		YASNLIPASDKTTKYRYPFVFDSDNQMCYI 0.44284548 64.76		YASNLIPASDKTTKYRYPFVFDSDNQMCYI 0.75173763 75.06
PASDKTTKYRYPFVFDSDNQ 0.23637112 57.88		PASDKTTKYRYPFVFDSDNQ -0.003431063 49.89		NLIPASDKTTKYRYPFVFDSDNQMC 0.23257093 57.75		ASNLIPASDKTTKYRYPFVFDSDNQMCYIL 0.42009795 64.00		ASNLIPASDKTTKYRYPFVFDSDNQMCYIL 0.77211286 75.74
ASDKTTKYRYPFVFDSDNQM 0.35466804 61.82		ASDKTTKYRYPFVFDSDNQM -0.043652974 48.54		LIPASDKTTKYRYPFVFDSDNQMCY 0.0272321 50.91		SNLIPASDKTTKYRYPFVFDSDNQMCYILY 0.57527007 69.18		SNLIPASDKTTKYRYPFVFDSDNQMCYILY 0.74532849 74.84
SDKTTKYRYPFVFDSDNQMC 0.23235984 57.75		SDKTTKYRYPFVFDSDNQMC -0.16793922 44.40		IPASDKTTKYRYPFVFDSDNQMCYI 0.0098574942 50.33		NLIPASDKTTKYRYPFVFDSDNQMCYILYS 0.53045229 67.68		NLIPASDKTTKYRYPFVFDSDNQMCYILYS 0.89234215 79.74
DKTTKYRYPFVFDSDNQMCY 0.33778347 61.26		DKTTKYRYPFVFDSDNQMCY -0.20793602 43.07		PASDKTTKYRYPFVFDSDNQMCYIL -0.00099641201 49.97		LIPASDKTTKYRYPFVFDSDNQMCYILYSA 0.3665419 62.22		LIPASDKTTKYRYPFVFDSDNQMCYILYSA 0.8014793 76.72
KTTKYRYPFVFDSDNQMCYI 0.074506813 52.48		KTTKYRYPFVFDSDNQMCYI -0.25701035 41.43		ASDKTTKYRYPFVFDSDNQMCYILY -0.0093322893 49.69		IPASDKTTKYRYPFVFDSDNQMCYILYSAI 0.29863969 59.95		IPASDKTTKYRYPFVFDSDNQMCYILYSAI 0.77601174 75.87
TTKYRYPFVFDSDNQMCYIL 0.14174002 54.72		TTKYRYPFVFDSDNQMCYIL -0.17883398 44.04		SDKTTKYRYPFVFDSDNQMCYILYS 0.17742428 55.91		PASDKTTKYRYPFVFDSDNQMCYILYSAIQ 0.20281532 56.76		PASDKTTKYRYPFVFDSDNQMCYILYSAIQ 0.87402018 79.13
TKYRYPFVFDSDNQMCYILY 0.072871855 52.43		TKYRYPFVFDSDNQMCYILY -0.065057619 47.83		DKTTKYRYPFVFDSDNQMCYILYSA 0.20087851 56.70		ASDKTTKYRYPFVFDSDNQMCYILYSAIQY 0.21937551 57.31		ASDKTTKYRYPFVFDSDNQMCYILYSAIQY 0.83502653 77.83
KYRYPFVFDSDNQMCYILYS 0.28656795 59.55		KYRYPFVFDSDNQMCYILYS 0.17241895 55.75		KTTKYRYPFVFDSDNQMCYILYSAI 0.011276944 50.38		SDKTTKYRYPFVFDSDNQMCYILYSAIQYN 0.40340689 63.45		SDKTTKYRYPFVFDSDNQMCYILYSAIQYN 0.87895478 79.30
YRYPFVFDSDNQMCYILYSA 0.15943117 55.31		YRYPFVFDSDNQMCYILYSA -0.027685679 49.08		TTKYRYPFVFDSDNQMCYILYSAIQ 0.038475955 51.28		DKTTKYRYPFVFDSDNQMCYILYSAIQYNQ 0.47026126 65.68		DKTTKYRYPFVFDSDNQMCYILYSAIQYNQ 0.76610464 75.54
RYPFVFDSDNQMCYILYSAI 0.16700758 55.57		RYPFVFDSDNQMCYILYSAI -0.25947574 41.35		TKYRYPFVFDSDNQMCYILYSAIQY 0.015219711 50.51		KTTKYRYPFVFDSDNQMCYILYSAIQYNQG 0.55057067 68.35		KTTKYRYPFVFDSDNQMCYILYSAIQYNQG 0.76095136 75.37
YPFVFDSDNQMCYILYSAIQ 0.15280845 55.09		YPFVFDSDNQMCYILYSAIQ -0.25975847 41.34		KYRYPFVFDSDNQMCYILYSAIQYN 0.08640931 52.88		TTKYRYPFVFDSDNQMCYILYSAIQYNQGS 0.62894297 70.96		TTKYRYPFVFDSDNQMCYILYSAIQYNQGS 0.84593142 78.20
PFVFDSDNQMCYILYSAIQY 0.30798276 60.27		PFVFDSDNQMCYILYSAIQY -0.024315199 49.19		YRYPFVFDSDNQMCYILYSAIQYNQ 0.00020995094 50.01		TKYRYPFVFDSDNQMCYILYSAIQYNQGSR 0.59921175 69.97		TKYRYPFVFDSDNQMCYILYSAIQYNQGSR 0.83994218 78.00
FVFDSDNQMCYILYSAIQYN 0.33639719 61.21		FVFDSDNQMCYILYSAIQYN -0.10180345 46.61		RYPFVFDSDNQMCYILYSAIQYNQG 0.16918878 55.64		KYRYPFVFDSDNQMCYILYSAIQYNQGSRY 0.52408631 67.47		KYRYPFVFDSDNQMCYILYSAIQYNQGSRY 0.74752456 74.92
VFDSDNQMCYILYSAIQYNQ 0.52084003 67.36		VFDSDNQMCYILYSAIQYNQ 0.20589434 56.86		YPFVFDSDNQMCYILYSAIQYNQGS 0.28818692 59.61		YRYPFVFDSDNQMCYILYSAIQYNQGSRYC 0.40899559 63.63		YRYPFVFDSDNQMCYILYSAIQYNQGSRYC 0.75965415 75.32
FDSDNQMCYILYSAIQYNQG 0.63623758 71.21		FDSDNQMCYILYSAIQYNQG 0.2321746 57.74		PFVFDSDNQMCYILYSAIQYNQGSR 0.3081195 60.27		RYPFVFDSDNQMCYILYSAIQYNQGSRYCD 0.37308443 62.44		RYPFVFDSDNQMCYILYSAIQYNQGSRYCD 0.64970976 71.66
DSDNQMCYILYSAIQYNQGS 0.49866044 66.62		DSDNQMCYILYSAIQYNQGS 0.1153098 53.84		FVFDSDNQMCYILYSAIQYNQGSRY 0.15592395 55.20		YPFVFDSDNQMCYILYSAIQYNQGSRYCDN 0.31001553 60.33		YPFVFDSDNQMCYILYSAIQYNQGSRYCDN 0.60420091 70.14
SDNQMCYILYSAIQYNQGSR 0.41222571 63.74		SDNQMCYILYSAIQYNQGSR 0.039100361 51.30		VFDSDNQMCYILYSAIQYNQGSRYC 0.32224428 60.74		PFVFDSDNQMCYILYSAIQYNQGSRYCDND 0.37047722 62.35		PFVFDSDNQMCYILYSAIQYNQGSRYCDND 0.5374585 67.92
DNQMCYILYSAIQYNQGSRY 0.47322948 65.77		DNQMCYILYSAIQYNQGSRY 0.085214283 52.84		FDSDNQMCYILYSAIQYNQGSRYCD 0.46313918 65.44		FVFDSDNQMCYILYSAIQYNQGSRYCDNDG 0.39412165 63.14		FVFDSDNQMCYILYSAIQYNQGSRYCDNDG 0.6520076 71.73
NQMCYILYSAIQYNQGSRYC 0.42433014 64.14		NQMCYILYSAIQYNQGSRYC 0.078416912 52.61		DSDNQMCYILYSAIQYNQGSRYCDN 0.19260929 56.42		VFDSDNQMCYILYSAIQYNQGSRYCDNDGS 0.50528279 66.84		VFDSDNQMCYILYSAIQYNQGSRYCDNDGS 0.73727059 74.58
QMCYILYSAIQYNQGSRYCD 0.45037467 65.01		QMCYILYSAIQYNQGSRYCD 0.042260767 51.41		SDNQMCYILYSAIQYNQGSRYCDND 0.32908878 60.97		FDSDNQMCYILYSAIQYNQGSRYCDNDGSS 0.55275063 68.43		FDSDNQMCYILYSAIQYNQGSRYCDNDGSS 0.77290867 75.76
MCYILYSAIQYNQGSRYCDN 0.36890985 62.30		MCYILYSAIQYNQGSRYCDN 0.14047556 54.68		DNQMCYILYSAIQYNQGSRYCDNDG 0.38451291 62.82		DSDNQMCYILYSAIQYNQGSRYCDNDGSSE 0.44731638 64.91		DSDNQMCYILYSAIQYNQGSRYCDNDGSSE 0.5901893 69.67
CYILYSAIQYNQGSRYCDND 0.47029729 65.68		CYILYSAIQYNQGSRYCDND 0.28935415 59.65		NQMCYILYSAIQYNQGSRYCDNDGS 0.54903317 68.30		SDNQMCYILYSAIQYNQGSRYCDNDGSSEE 0.64438964 71.48		SDNQMCYILYSAIQYNQGSRYCDNDGSSEE 0.56891987 68.96
YILYSAIQYNQGSRYCDNDG 0.35600209 61.87		YILYSAIQYNQGSRYCDNDG 0.19833173 56.61		QMCYILYSAIQYNQGSRYCDNDGSS 0.56425053 68.81		DNQMCYILYSAIQYNQGSRYCDNDGSSEEG 0.53201564 67.73		DNQMCYILYSAIQYNQGSRYCDNDGSSEEG 0.54994928 68.33
ILYSAIQYNQGSRYCDNDGS 0.41786443 63.93		ILYSAIQYNQGSRYCDNDGS 0.31773426 60.59		MCYILYSAIQYNQGSRYCDNDGSSE 0.53482522 67.83		NQMCYILYSAIQYNQGSRYCDNDGSSEEGT 0.77480813 75.83		NQMCYILYSAIQYNQGSRYCDNDGSSEEGT 0.55857504 68.62
LYSAIQYNQGSRYCDNDGSS 0.58205982 69.40		LYSAIQYNQGSRYCDNDGSS 0.4183933 63.95		CYILYSAIQYNQGSRYCDNDGSSEE 0.73770557 74.59		QMCYILYSAIQYNQGSRYCDNDGSSEEGTS 0.76487286 75.50		QMCYILYSAIQYNQGSRYCDNDGSSEEGTS 0.54001025 68.00
YSAIQYNQGSRYCDNDGSSE 0.60835513 70.28		YSAIQYNQGSRYCDNDGSSE 0.74663389 74.89		YILYSAIQYNQGSRYCDNDGSSEEG 0.72718679 74.24		MCYILYSAIQYNQGSRYCDNDGSSEEGTSS 0.80794229 76.93		MCYILYSAIQYNQGSRYCDNDGSSEEGTSS 0.60138129 70.05
SAIQYNQGSRYCDNDGSSEE 0.65122468 71.71		SAIQYNQGSRYCDNDGSSEE 0.88320756 79.44		ILYSAIQYNQGSRYCDNDGSSEEGT 0.88462947 79.49		CYILYSAIQYNQGSRYCDNDGSSEEGTSSL 0.88819122 79.61		CYILYSAIQYNQGSRYCDNDGSSEEGTSSL 0.52685818 67.56
AIQYNQGSRYCDNDGSSEEG 0.58660676 69.55		AIQYNQGSRYCDNDGSSEEG 0.78327055 76.11		LYSAIQYNQGSRYCDNDGSSEEGTS 0.88751215 79.58		YILYSAIQYNQGSRYCDNDGSSEEGTSSLL 0.7864064 76.21		YILYSAIQYNQGSRYCDNDGSSEEGTSSLL 0.61446384 70.48
IQYNQGSRYCDNDGSSEEGT 0.78687541 76.23		IQYNQGSRYCDNDGSSEEGT 0.986484 82.88		YSAIQYNQGSRYCDNDGSSEEGTSS 0.78251319 76.08		ILYSAIQYNQGSRYCDNDGSSEEGTSSLLC 0.90036022 80.01		ILYSAIQYNQGSRYCDNDGSSEEGTSSLLC 0.63749377 71.25
QYNQGSRYCDNDGSSEEGTS 0.85891312 78.63		QYNQGSRYCDNDGSSEEGTS 0.88066846 79.36		SAIQYNQGSRYCDNDGSSEEGTSSL 0.79564777 76.52		LYSAIQYNQGSRYCDNDGSSEEGTSSLLCM 0.85502337 78.50		LYSAIQYNQGSRYCDNDGSSEEGTSSLLCM 0.67834675 72.61
YNQGSRYCDNDGSSEEGTSS 0.75660892 75.22		YNQGSRYCDNDGSSEEGTSS 0.67353987 72.45		AIQYNQGSRYCDNDGSSEEGTSSLL 0.78742034 76.25		YSAIQYNQGSRYCDNDGSSEEGTSSLLCMK 0.87201393 79.07		YSAIQYNQGSRYCDNDGSSEEGTSSLLCMK 0.84762688 78.25
NQGSRYCDNDGSSEEGTSSL 0.69428234 73.14		NQGSRYCDNDGSSEEGTSSL 0.68994162 73.00		IQYNQGSRYCDNDGSSEEGTSSLLC 0.91573113 80.52		SAIQYNQGSRYCDNDGSSEEGTSSLLCMKP 0.81157552 77.05		SAIQYNQGSRYCDNDGSSEEGTSSLLCMKP 0.72156309 74.05
QGSRYCDNDGSSEEGTSSLL 0.56790501 68.93		QGSRYCDNDGSSEEGTSSLL 0.52453202 67.48		QYNQGSRYCDNDGSSEEGTSSLLCM 0.88282414 79.43		AIQYNQGSRYCDNDGSSEEGTSSLLCMKPY 0.82663781 77.55		AIQYNQGSRYCDNDGSSEEGTSSLLCMKPY 0.65460314 71.82
GSRYCDNDGSSEEGTSSLLC 0.59959343 69.99		GSRYCDNDGSSEEGTSSLLC 0.74496319 74.83		YNQGSRYCDNDGSSEEGTSSLLCMK 0.82225585 77.41		IQYNQGSRYCDNDGSSEEGTSSLLCMKPYK 0.76112454 75.37		IQYNQGSRYCDNDGSSEEGTSSLLCMKPYK 0.65445701 71.82
SRYCDNDGSSEEGTSSLLCM 0.44237147 64.75		SRYCDNDGSSEEGTSSLLCM 0.57506685 69.17		NQGSRYCDNDGSSEEGTSSLLCMKP 0.73074066 74.36		QYNQGSRYCDNDGSSEEGTSSLLCMKPYKS 0.7537184 75.12		QYNQGSRYCDNDGSSEEGTSSLLCMKPYKS 0.47565192 65.86
RYCDNDGSSEEGTSSLLCMK 0.50455342 66.82		RYCDNDGSSEEGTSSLLCMK 0.80076965 76.69		QGSRYCDNDGSSEEGTSSLLCMKPY 0.80607421 76.87		YNQGSRYCDNDGSSEEGTSSLLCMKPYKSA 0.55423005 68.47		YNQGSRYCDNDGSSEEGTSSLLCMKPYKSA 0.49225064 66.41
YCDNDGSSEEGTSSLLCMKP 0.37090711 62.36		YCDNDGSSEEGTSSLLCMKP 0.48703288 66.23		GSRYCDNDGSSEEGTSSLLCMKPYK 0.55337565 68.45		NQGSRYCDNDGSSEEGTSSLLCMKPYKSAE 0.49131511 66.38		NQGSRYCDNDGSSEEGTSSLLCMKPYKSAE 0.44158096 64.72
CDNDGSSEEGTSSLLCMKPY 0.58724114 69.57		CDNDGSSEEGTSSLLCMKPY 0.68567463 72.86		SRYCDNDGSSEEGTSSLLCMKPYKS 0.59512801 69.84		QGSRYCDNDGSSEEGTSSLLCMKPYKSAED 0.49123041 66.37		QGSRYCDNDGSSEEGTSSLLCMKPYKSAED 0.69479191 73.16
DNDGSSEEGTSSLLCMKPYK 0.3897609 62.99		DNDGSSEEGTSSLLCMKPYK 0.43911707 64.64		RYCDNDGSSEEGTSSLLCMKPYKSA 0.42858134 64.29		GSRYCDNDGSSEEGTSSLLCMKPYKSAEDA 0.43171892 64.39		GSRYCDNDGSSEEGTSSLLCMKPYKSAEDA 0.68898079 72.97
NDGSSEEGTSSLLCMKPYKS 0.53616077 67.87		NDGSSEEGTSSLLCMKPYKS 0.69144223 73.05		YCDNDGSSEEGTSSLLCMKPYKSAE 0.27747301 59.25		SRYCDNDGSSEEGTSSLLCMKPYKSAEDAH 0.47212861 65.74		SRYCDNDGSSEEGTSSLLCMKPYKSAEDAH 0.79765959 76.59
DGSSEEGTSSLLCMKPYKSA 0.46912078 65.64		DGSSEEGTSSLLCMKPYKSA 0.43515975 64.51		CDNDGSSEEGTSSLLCMKPYKSAED 0.29713905 59.90		RYCDNDGSSEEGTSSLLCMKPYKSAEDAHL 0.48525984 66.18		RYCDNDGSSEEGTSSLLCMKPYKSAEDAHL 0.70474165 73.49
GSSEEGTSSLLCMKPYKSAE 0.34610022 61.54		GSSEEGTSSLLCMKPYKSAE 0.57556549 69.19		DNDGSSEEGTSSLLCMKPYKSAEDA 0.17406577 55.80		YCDNDGSSEEGTSSLLCMKPYKSAEDAHLY 0.42949853 64.32		YCDNDGSSEEGTSSLLCMKPYKSAEDAHLY 0.63159135 71.05
SSEEGTSSLLCMKPYKSAED 0.47350912 65.78		SSEEGTSSLLCMKPYKSAED 0.66858808 72.29		NDGSSEEGTSSLLCMKPYKSAEDAH 0.24232533 58.08		CDNDGSSEEGTSSLLCMKPYKSAEDAHLYY 0.29991796 60.00		CDNDGSSEEGTSSLLCMKPYKSAEDAHLYY 0.71603951 73.87
SEEGTSSLLCMKPYKSAEDA 0.44730791 64.91		SEEGTSSLLCMKPYKSAEDA 0.58602675 69.53		DGSSEEGTSSLLCMKPYKSAEDAHL 0.24849556 58.28		DNDGSSEEGTSSLLCMKPYKSAEDAHLYYG 0.22719353 57.57		DNDGSSEEGTSSLLCMKPYKSAEDAHLYYG 0.72688399 74.23
EEGTSSLLCMKPYKSAEDAH 0.61448597 70.48		EEGTSSLLCMKPYKSAEDAH 0.68508064 72.84		GSSEEGTSSLLCMKPYKSAEDAHLY -0.056111208 48.13		NDGSSEEGTSSLLCMKPYKSAEDAHLYYGS 0.24768382 58.26		NDGSSEEGTSSLLCMKPYKSAEDAHLYYGS 0.79734635 76.58
EGTSSLLCMKPYKSAEDAHL 0.73184029 74.39		EGTSSLLCMKPYKSAEDAHL 0.71389871 73.80		SSEEGTSSLLCMKPYKSAEDAHLYY -0.1332729 45.56		DGSSEEGTSSLLCMKPYKSAEDAHLYYGSA 0.14488864 54.83		DGSSEEGTSSLLCMKPYKSAEDAHLYYGSA 0.72005993 74.00
GTSSLLCMKPYKSAEDAHLY 0.69688303 73.23		GTSSLLCMKPYKSAEDAHLY 0.81230221 77.08		SEEGTSSLLCMKPYKSAEDAHLYYG -0.078255835 47.39		GSSEEGTSSLLCMKPYKSAEDAHLYYGSAK 0.11333114 53.78		GSSEEGTSSLLCMKPYKSAEDAHLYYGSAK 0.68383894 72.79
TSSLLCMKPYKSAEDAHLYY 0.44131487 64.71		TSSLLCMKPYKSAEDAHLYY 0.44448938 64.82		EEGTSSLLCMKPYKSAEDAHLYYGS -0.070101948 47.66		SSEEGTSSLLCMKPYKSAEDAHLYYGSAKV 0.088247849 52.94		SSEEGTSSLLCMKPYKSAEDAHLYYGSAKV 0.62191643 70.73
SSLLCMKPYKSAEDAHLYYG 0.38250795 62.75		SSLLCMKPYKSAEDAHLYYG 0.43076092 64.36		EGTSSLLCMKPYKSAEDAHLYYGSA -0.21272219 42.91		SEEGTSSLLCMKPYKSAEDAHLYYGSAKVD 0.076302385 52.54		SEEGTSSLLCMKPYKSAEDAHLYYGSAKVD 0.7220762 74.07
SLLCMKPYKSAEDAHLYYGS 0.20079872 56.69		SLLCMKPYKSAEDAHLYYGS 0.25694351 58.56		GTSSLLCMKPYKSAEDAHLYYGSAK -0.16370442 44.54		EEGTSSLLCMKPYKSAEDAHLYYGSAKVDP 0.11815425 53.94		EEGTSSLLCMKPYKSAEDAHLYYGSAKVDP 0.96345328 82.12
LLCMKPYKSAEDAHLYYGSA 0.24378433 58.13		LLCMKPYKSAEDAHLYYGSA 0.10895969 53.63		TSSLLCMKPYKSAEDAHLYYGSAKV -0.43734486 35.42		EGTSSLLCMKPYKSAEDAHLYYGSAKVDPD 0.27686045 59.23		EGTSSLLCMKPYKSAEDAHLYYGSAKVDPD 1.0276858 84.26
LCMKPYKSAEDAHLYYGSAK 0.19974025 56.66		LCMKPYKSAEDAHLYYGSAK -0.047102218 48.43		SSLLCMKPYKSAEDAHLYYGSAKVD -0.32544306 39.15		GTSSLLCMKPYKSAEDAHLYYGSAKVDPDW 0.22105087 57.37		GTSSLLCMKPYKSAEDAHLYYGSAKVDPDW 0.91071937 80.36
CMKPYKSAEDAHLYYGSAKV 0.087642701 52.92		CMKPYKSAEDAHLYYGSAKV -0.043860768 48.54		SLLCMKPYKSAEDAHLYYGSAKVDP -0.22567392 42.48		TSSLLCMKPYKSAEDAHLYYGSAKVDPDWE 0.14774921 54.92		TSSLLCMKPYKSAEDAHLYYGSAKVDPDWE 0.86878871 78.96
MKPYKSAEDAHLYYGSAKVD 0.30025453 60.01		MKPYKSAEDAHLYYGSAKVD 0.18327124 56.11		LLCMKPYKSAEDAHLYYGSAKVDPD -0.11547101 46.15		SSLLCMKPYKSAEDAHLYYGSAKVDPDWEE 0.21594644 57.20		SSLLCMKPYKSAEDAHLYYGSAKVDPDWEE 1.0307458 84.36
KPYKSAEDAHLYYGSAKVDP 0.30382683 60.13		KPYKSAEDAHLYYGSAKVDP -0.061401009 47.95		LCMKPYKSAEDAHLYYGSAKVDPDW -0.13058934 45.65		SLLCMKPYKSAEDAHLYYGSAKVDPDWEEN 0.19478994 56.49		SLLCMKPYKSAEDAHLYYGSAKVDPDWEEN 1.0117942 83.73
PYKSAEDAHLYYGSAKVDPD 0.31162985 60.39		PYKSAEDAHLYYGSAKVDPD -0.083611134 47.21		CMKPYKSAEDAHLYYGSAKVDPDWE -0.036191659 48.79		LLCMKPYKSAEDAHLYYGSAKVDPDWEENC 0.20576675 56.86		LLCMKPYKSAEDAHLYYGSAKVDPDWEENC 1.1475365 88.25
YKSAEDAHLYYGSAKVDPDW 0.28244908 59.41		YKSAEDAHLYYGSAKVDPDW -0.076578561 47.45		MKPYKSAEDAHLYYGSAKVDPDWEE -0.032405834 48.92		LCMKPYKSAEDAHLYYGSAKVDPDWEENCP 0.14942668 54.98		LCMKPYKSAEDAHLYYGSAKVDPDWEENCP 1.0273445 84.24
KSAEDAHLYYGSAKVDPDWE 0.22185326 57.40		KSAEDAHLYYGSAKVDPDWE -0.16925675 44.36		KPYKSAEDAHLYYGSAKVDPDWEEN 0.050550094 51.69		CMKPYKSAEDAHLYYGSAKVDPDWEENCPM 0.10722051 53.57		CMKPYKSAEDAHLYYGSAKVDPDWEENCPM 1.0119666 83.73
SAEDAHLYYGSAKVDPDWEE 0.18921077 56.31		SAEDAHLYYGSAKVDPDWEE -0.28320088 40.56		PYKSAEDAHLYYGSAKVDPDWEENC 0.060776057 52.03		MKPYKSAEDAHLYYGSAKVDPDWEENCPMH 0.32550958 60.85		MKPYKSAEDAHLYYGSAKVDPDWEENCPMH 1.0083566 83.61
AEDAHLYYGSAKVDPDWEEN 0.25411554 58.47		AEDAHLYYGSAKVDPDWEEN -0.19968537 43.34		YKSAEDAHLYYGSAKVDPDWEENCP 0.072162671 52.41		KPYKSAEDAHLYYGSAKVDPDWEENCPMHP 0.40467167 63.49		KPYKSAEDAHLYYGSAKVDPDWEENCPMHP 1.1014288 86.71
EDAHLYYGSAKVDPDWEENC 0.4150046 63.83		EDAHLYYGSAKVDPDWEENC -0.089117531 47.03		KSAEDAHLYYGSAKVDPDWEENCPM -0.059830365 48.01		PYKSAEDAHLYYGSAKVDPDWEENCPMHPV 0.36404162 62.13		PYKSAEDAHLYYGSAKVDPDWEENCPMHPV 1.020281 84.01
DAHLYYGSAKVDPDWEENCP 0.26483076 58.83		DAHLYYGSAKVDPDWEENCP -0.167347 44.42		SAEDAHLYYGSAKVDPDWEENCPMH 0.050058053 51.67		YKSAEDAHLYYGSAKVDPDWEENCPMHPVR 0.43791396 64.60		YKSAEDAHLYYGSAKVDPDWEENCPMHPVR 1.0654826 85.52
AHLYYGSAKVDPDWEENCPM 0.13051628 54.35		AHLYYGSAKVDPDWEENCPM -0.33400507 38.87		AEDAHLYYGSAKVDPDWEENCPMHP 0.16951947 55.65		KSAEDAHLYYGSAKVDPDWEENCPMHPVRD 0.4236116 64.12		KSAEDAHLYYGSAKVDPDWEENCPMHPVRD 1.1521019 88.40
HLYYGSAKVDPDWEENCPMH 0.52971033 67.66		HLYYGSAKVDPDWEENCPMH -0.065033022 47.83		EDAHLYYGSAKVDPDWEENCPMHPV 0.088922506 52.96		SAEDAHLYYGSAKVDPDWEENCPMHPVRDA 0.35393063 61.80		SAEDAHLYYGSAKVDPDWEENCPMHPVRDA 1.1768566 89.23
LYYGSAKVDPDWEENCPMHP 0.69470277 73.16		LYYGSAKVDPDWEENCPMHP 0.12336449 54.11		DAHLYYGSAKVDPDWEENCPMHPVR 0.091146573 53.04		AEDAHLYYGSAKVDPDWEENCPMHPVRDAI 0.14332696 54.78		AEDAHLYYGSAKVDPDWEENCPMHPVRDAI 1.2500388 91.67
YYGSAKVDPDWEENCPMHPV 0.80335916 76.78		YYGSAKVDPDWEENCPMHPV 0.13716217 54.57		AHLYYGSAKVDPDWEENCPMHPVRD 0.2056355 56.85		EDAHLYYGSAKVDPDWEENCPMHPVRDAIF 0.11770322 53.92		EDAHLYYGSAKVDPDWEENCPMHPVRDAIF 1.2796734 92.66
YGSAKVDPDWEENCPMHPVR 0.87896786 79.30		YGSAKVDPDWEENCPMHPVR 0.22828364 57.61		HLYYGSAKVDPDWEENCPMHPVRDA 0.047350861 51.58		DAHLYYGSAKVDPDWEENCPMHPVRDAIFG 0.084515196 52.82		DAHLYYGSAKVDPDWEENCPMHPVRDAIFG 1.0814294 86.05
GSAKVDPDWEENCPMHPVRD 1.00258 83.42		GSAKVDPDWEENCPMHPVRD 0.27232526 59.08		LYYGSAKVDPDWEENCPMHPVRDAI -0.073455398 47.55		AHLYYGSAKVDPDWEENCPMHPVRDAIFGK 0.15085976 55.03		AHLYYGSAKVDPDWEENCPMHPVRDAIFGK 1.1361225 87.87
SAKVDPDWEENCPMHPVRDA 0.97522358 82.51		SAKVDPDWEENCPMHPVRDA 0.12025368 54.01		YYGSAKVDPDWEENCPMHPVRDAIF -0.068901854 47.70		HLYYGSAKVDPDWEENCPMHPVRDAIFGKW 0.067491843 52.25		HLYYGSAKVDPDWEENCPMHPVRDAIFGKW 0.94462292 81.49
AKVDPDWEENCPMHPVRDAI 0.98159965 82.72		AKVDPDWEENCPMHPVRDAI -0.012271599 49.59		YGSAKVDPDWEENCPMHPVRDAIFG -0.018277054 49.39		LYYGSAKVDPDWEENCPMHPVRDAIFGKWS 0.13386746 54.46		LYYGSAKVDPDWEENCPMHPVRDAIFGKWS 1.0087851 83.63
KVDPDWEENCPMHPVRDAIF 0.96881488 82.29		KVDPDWEENCPMHPVRDAIF -0.025383079 49.15		GSAKVDPDWEENCPMHPVRDAIFGK -0.093763201 46.87		YYGSAKVDPDWEENCPMHPVRDAIFGKWSG 0.15027336 55.01		YYGSAKVDPDWEENCPMHPVRDAIFGKWSG 1.0803163 86.01
VDPDWEENCPMHPVRDAIFG 1.201085 90.04		VDPDWEENCPMHPVRDAIFG 0.21726447 57.24		SAKVDPDWEENCPMHPVRDAIFGKW -0.21027735 42.99		YGSAKVDPDWEENCPMHPVRDAIFGKWSGG 0.192812 56.43		YGSAKVDPDWEENCPMHPVRDAIFGKWSGG 0.90555514 80.19
DPDWEENCPMHPVRDAIFGK 1.0427128 84.76		DPDWEENCPMHPVRDAIFGK 0.050346043 51.68		AKVDPDWEENCPMHPVRDAIFGKWS -0.34448896 38.52		GSAKVDPDWEENCPMHPVRDAIFGKWSGGS 0.12455653 54.15		GSAKVDPDWEENCPMHPVRDAIFGKWSGGS 0.93172108 81.06
PDWEENCPMHPVRDAIFGKW 0.67976578 72.66		PDWEENCPMHPVRDAIFGKW -0.067336308 47.76		KVDPDWEENCPMHPVRDAIFGKWSG -0.38324925 37.23		SAKVDPDWEENCPMHPVRDAIFGKWSGGSC 0.13206886 54.40		SAKVDPDWEENCPMHPVRDAIFGKWSGGSC 0.83165917 77.72
DWEENCPMHPVRDAIFGKWS 0.66740723 72.25		DWEENCPMHPVRDAIFGKWS -0.24908559 41.70		VDPDWEENCPMHPVRDAIFGKWSGG -0.20106781 43.30		AKVDPDWEENCPMHPVRDAIFGKWSGGSCV 0.056021249 51.87		AKVDPDWEENCPMHPVRDAIFGKWSGGSCV 0.73821843 74.61
WEENCPMHPVRDAIFGKWSG 0.49667712 66.56		WEENCPMHPVRDAIFGKWSG -0.41912429 36.03		DPDWEENCPMHPVRDAIFGKWSGGS -0.15699577 44.77		KVDPDWEENCPMHPVRDAIFGKWSGGSCVA -0.047307425 48.42		KVDPDWEENCPMHPVRDAIFGKWSGGSCVA 0.74968017 74.99
EENCPMHPVRDAIFGKWSGG 0.41061958 63.69		EENCPMHPVRDAIFGKWSGG -0.38666227 37.11		PDWEENCPMHPVRDAIFGKWSGGSC -0.24530717 41.82		VDPDWEENCPMHPVRDAIFGKWSGGSCVAI -0.047684292 48.41		VDPDWEENCPMHPVRDAIFGKWSGGSCVAI 0.78723111 76.24
ENCPMHPVRDAIFGKWSGGS 0.37791104 62.60		ENCPMHPVRDAIFGKWSGGS -0.43363612 35.55		DWEENCPMHPVRDAIFGKWSGGSCV -0.51929175 32.69		DPDWEENCPMHPVRDAIFGKWSGGSCVAIA -0.02811438 49.06		DPDWEENCPMHPVRDAIFGKWSGGSCVAIA 0.64008443 71.34
NCPMHPVRDAIFGKWSGGSC 0.36879962 62.29		NCPMHPVRDAIFGKWSGGSC -0.28918167 40.36		WEENCPMHPVRDAIFGKWSGGSCVA -0.53373825 32.21		PDWEENCPMHPVRDAIFGKWSGGSCVAIAP 0.027276251 50.91		PDWEENCPMHPVRDAIFGKWSGGSCVAIAP 0.59721116 69.91
CPMHPVRDAIFGKWSGGSCV 0.26188691 58.73		CPMHPVRDAIFGKWSGGSCV -0.32876453 39.04		EENCPMHPVRDAIFGKWSGGSCVAI -0.76662764 24.45		DWEENCPMHPVRDAIFGKWSGGSCVAIAPA -0.02666976 49.11		DWEENCPMHPVRDAIFGKWSGGSCVAIAPA 0.46197544 65.40
PMHPVRDAIFGKWSGGSCVA 0.23667426 57.89		PMHPVRDAIFGKWSGGSCVA -0.29412473 40.20		ENCPMHPVRDAIFGKWSGGSCVAIA -0.5678492 31.07		WEENCPMHPVRDAIFGKWSGGSCVAIAPAF -0.013793941 49.54		WEENCPMHPVRDAIFGKWSGGSCVAIAPAF 0.43717346 64.57
MHPVRDAIFGKWSGGSCVAI 0.41435114 63.81		MHPVRDAIFGKWSGGSCVAI -0.24407242 41.86		NCPMHPVRDAIFGKWSGGSCVAIAP -0.43320653 35.56		EENCPMHPVRDAIFGKWSGGSCVAIAPAFQ 0.045386495 51.51		EENCPMHPVRDAIFGKWSGGSCVAIAPAFQ 0.53352595 67.78
HPVRDAIFGKWSGGSCVAIA -0.019539754 49.35		HPVRDAIFGKWSGGSCVAIA -0.34766187 38.41		CPMHPVRDAIFGKWSGGSCVAIAPA -0.519567 32.68		ENCPMHPVRDAIFGKWSGGSCVAIAPAFQE 0.045020337 51.50		ENCPMHPVRDAIFGKWSGGSCVAIAPAFQE 0.38755331 62.92
PVRDAIFGKWSGGSCVAIAP -0.0027055363 49.91		PVRDAIFGKWSGGSCVAIAP -0.30029411 39.99		PMHPVRDAIFGKWSGGSCVAIAPAF -0.40141282 36.62		NCPMHPVRDAIFGKWSGGSCVAIAPAFQEY 0.10955461 53.65		NCPMHPVRDAIFGKWSGGSCVAIAPAFQEY 0.40104879 63.37
VRDAIFGKWSGGSCVAIAPA -0.15623969 44.79		VRDAIFGKWSGGSCVAIAPA -0.16814956 44.40		MHPVRDAIFGKWSGGSCVAIAPAFQ -0.22021811 42.66		CPMHPVRDAIFGKWSGGSCVAIAPAFQEYA 0.010107241 50.34		CPMHPVRDAIFGKWSGGSCVAIAPAFQEYA 0.306169 60.21
RDAIFGKWSGGSCVAIAPAF 0.052594388 51.75		RDAIFGKWSGGSCVAIAPAF 0.019681905 50.66		HPVRDAIFGKWSGGSCVAIAPAFQE -0.27966384 40.68		PMHPVRDAIFGKWSGGSCVAIAPAFQEYAN 0.029471298 50.98		PMHPVRDAIFGKWSGGSCVAIAPAFQEYAN 0.30292922 60.10
DAIFGKWSGGSCVAIAPAFQ 0.10891666 53.63		DAIFGKWSGGSCVAIAPAFQ -0.072881552 47.57		PVRDAIFGKWSGGSCVAIAPAFQEY -0.074570825 47.51		MHPVRDAIFGKWSGGSCVAIAPAFQEYANS 0.15390004 55.13		MHPVRDAIFGKWSGGSCVAIAPAFQEYANS 0.35397847 61.80
AIFGKWSGGSCVAIAPAFQE 0.22083895 57.36		AIFGKWSGGSCVAIAPAFQE 0.02937786 50.98		VRDAIFGKWSGGSCVAIAPAFQEYA -0.1215994 45.95		HPVRDAIFGKWSGGSCVAIAPAFQEYANST -0.03817142 48.73		HPVRDAIFGKWSGGSCVAIAPAFQEYANST 0.37491162 62.50
IFGKWSGGSCVAIAPAFQEY 0.0012016861 50.04		IFGKWSGGSCVAIAPAFQEY -0.11737593 46.09		RDAIFGKWSGGSCVAIAPAFQEYAN -0.12699719 45.77		PVRDAIFGKWSGGSCVAIAPAFQEYANSTE -0.20792247 43.07		PVRDAIFGKWSGGSCVAIAPAFQEYANSTE 0.23263215 57.75
FGKWSGGSCVAIAPAFQEYA -0.13582502 45.47		FGKWSGGSCVAIAPAFQEYA -0.2286274 42.38		DAIFGKWSGGSCVAIAPAFQEYANS -0.093699197 46.88		VRDAIFGKWSGGSCVAIAPAFQEYANSTED -0.16501457 44.50		VRDAIFGKWSGGSCVAIAPAFQEYANSTED 0.57691008 69.23
GKWSGGSCVAIAPAFQEYAN -0.40295357 36.57		GKWSGGSCVAIAPAFQEYAN -0.64616202 28.46		AIFGKWSGGSCVAIAPAFQEYANST -0.29888217 40.04		RDAIFGKWSGGSCVAIAPAFQEYANSTEDC -0.24228174 41.92		RDAIFGKWSGGSCVAIAPAFQEYANSTEDC 0.45255399 65.09
KWSGGSCVAIAPAFQEYANS -0.3221494 39.26		KWSGGSCVAIAPAFQEYANS -0.40765183 36.41		IFGKWSGGSCVAIAPAFQEYANSTE -0.2255479 42.48		DAIFGKWSGGSCVAIAPAFQEYANSTEDCA -0.22487429 42.50		DAIFGKWSGGSCVAIAPAFQEYANSTEDCA 0.26268057 58.76
WSGGSCVAIAPAFQEYANST -0.20051617 43.32		WSGGSCVAIAPAFQEYANST -0.51321244 32.89		FGKWSGGSCVAIAPAFQEYANSTED -0.19161508 43.61		AIFGKWSGGSCVAIAPAFQEYANSTEDCAA -0.23316441 42.23		AIFGKWSGGSCVAIAPAFQEYANSTEDCAA 0.27103986 59.03
SGGSCVAIAPAFQEYANSTE -0.4781279 34.06		SGGSCVAIAPAFQEYANSTE -0.7915943 23.61		GKWSGGSCVAIAPAFQEYANSTEDC -0.26311208 41.23		IFGKWSGGSCVAIAPAFQEYANSTEDCAAI -0.23316441 42.23		IFGKWSGGSCVAIAPAFQEYANSTEDCAAI 0.27103986 59.03
GGSCVAIAPAFQEYANSTED -0.33465562 38.84		GGSCVAIAPAFQEYANSTED -0.53239968 32.25		KWSGGSCVAIAPAFQEYANSTEDCA -0.094704521 46.84		FGKWSGGSCVAIAPAFQEYANSTEDCAAIL -0.2094093 43.02		FGKWSGGSCVAIAPAFQEYANSTEDCAAIL 0.27002459 59.00
GSCVAIAPAFQEYANSTEDC -0.11483394 46.17		GSCVAIAPAFQEYANSTEDC -0.39854771 36.72		WSGGSCVAIAPAFQEYANSTEDCAA 0.033194994 51.11		GKWSGGSCVAIAPAFQEYANSTEDCAAILF -0.19356021 43.55		GKWSGGSCVAIAPAFQEYANSTEDCAAILF 0.20913631 56.97
SCVAIAPAFQEYANSTEDCA -0.14053594 45.32		SCVAIAPAFQEYANSTEDCA -0.38298758 37.23		SGGSCVAIAPAFQEYANSTEDCAAI -0.15353226 44.88		KWSGGSCVAIAPAFQEYANSTEDCAAILFD 0.017653835 50.59		KWSGGSCVAIAPAFQEYANSTEDCAAILFD 0.24882867 58.29
CVAIAPAFQEYANSTEDCAA -0.16670384 44.44		CVAIAPAFQEYANSTEDCAA -0.53940504 32.02		GGSCVAIAPAFQEYANSTEDCAAIL -0.075519929 47.48		WSGGSCVAIAPAFQEYANSTEDCAAILFDN 0.06034015 52.01		WSGGSCVAIAPAFQEYANSTEDCAAILFDN 0.2336768 57.79
VAIAPAFQEYANSTEDCAAI 0.00081740978 50.03		VAIAPAFQEYANSTEDCAAI -0.46373452 34.54		GSCVAIAPAFQEYANSTEDCAAILF -0.022985087 49.23		SGGSCVAIAPAFQEYANSTEDCAAILFDNS 0.10763356 53.59		SGGSCVAIAPAFQEYANSTEDCAAILFDNS 0.13498579 54.50
AIAPAFQEYANSTEDCAAIL 0.07096184 52.37		AIAPAFQEYANSTEDCAAIL -0.62489286 29.17		SCVAIAPAFQEYANSTEDCAAILFD 0.14591058 54.86		GGSCVAIAPAFQEYANSTEDCAAILFDNSA 0.124663 54.16		GGSCVAIAPAFQEYANSTEDCAAILFDNSA 0.19326148 56.44
IAPAFQEYANSTEDCAAILF -0.060332918 47.99		IAPAFQEYANSTEDCAAILF -0.515765 32.81		CVAIAPAFQEYANSTEDCAAILFDN 0.08219818 52.74		GSCVAIAPAFQEYANSTEDCAAILFDNSAT 0.15670711 55.22		GSCVAIAPAFQEYANSTEDCAAILFDNSAT 0.12423407 54.14
APAFQEYANSTEDCAAILFD 0.062406891 52.08		APAFQEYANSTEDCAAILFD -0.69477283 26.84		VAIAPAFQEYANSTEDCAAILFDNS 0.14345403 54.78		SCVAIAPAFQEYANSTEDCAAILFDNSATD 0.14398034 54.80		SCVAIAPAFQEYANSTEDCAAILFDNSATD -0.12859461 45.71
PAFQEYANSTEDCAAILFDN -0.14102852 45.30		PAFQEYANSTEDCAAILFDN -0.72990964 25.67		AIAPAFQEYANSTEDCAAILFDNSA 0.18504212 56.17		CVAIAPAFQEYANSTEDCAAILFDNSATDL 0.25222041 58.41		CVAIAPAFQEYANSTEDCAAILFDNSATDL 0.045711008 51.52
AFQEYANSTEDCAAILFDNS -0.013301525 49.56		AFQEYANSTEDCAAILFDNS -0.60424218 29.86		IAPAFQEYANSTEDCAAILFDNSAT 0.23845881 57.95		VAIAPAFQEYANSTEDCAAILFDNSATDLD 0.30028919 60.01		VAIAPAFQEYANSTEDCAAILFDNSATDLD 0.10826448 53.61
FQEYANSTEDCAAILFDNSA 0.059164045 51.97		FQEYANSTEDCAAILFDNSA -0.4340947 35.53		APAFQEYANSTEDCAAILFDNSATD 0.097063887 53.24		AIAPAFQEYANSTEDCAAILFDNSATDLDI 0.15077113 55.03		AIAPAFQEYANSTEDCAAILFDNSATDLDI 0.1614698 55.38
QEYANSTEDCAAILFDNSAT -0.12782488 45.74		QEYANSTEDCAAILFDNSAT -0.47512335 34.16		PAFQEYANSTEDCAAILFDNSATDL 0.040923467 51.36		IAPAFQEYANSTEDCAAILFDNSATDLDID 0.44872724 64.96		IAPAFQEYANSTEDCAAILFDNSATDLDID 0.047558925 51.59
EYANSTEDCAAILFDNSATD -0.20795855 43.07		EYANSTEDCAAILFDNSATD -0.37049608 37.65		AFQEYANSTEDCAAILFDNSATDLD 0.12453301 54.15		APAFQEYANSTEDCAAILFDNSATDLDIDV 0.54488476 68.16		APAFQEYANSTEDCAAILFDNSATDLDIDV 0.14440301 54.81
YANSTEDCAAILFDNSATDL -0.12960742 45.68		YANSTEDCAAILFDNSATDL -0.26688222 41.10		FQEYANSTEDCAAILFDNSATDLDI 0.17491218 55.83		PAFQEYANSTEDCAAILFDNSATDLDIDVV 0.38543981 62.85		PAFQEYANSTEDCAAILFDNSATDLDIDVV 0.078363041 52.61
ANSTEDCAAILFDNSATDLD 0.0095098789 50.32		ANSTEDCAAILFDNSATDLD -0.093293792 46.89		QEYANSTEDCAAILFDNSATDLDID 0.23024759 57.67		AFQEYANSTEDCAAILFDNSATDLDIDVVN 0.38000441 62.67		AFQEYANSTEDCAAILFDNSATDLDIDVVN 0.15033925 55.01
NSTEDCAAILFDNSATDLDI 0.16030699 55.34		NSTEDCAAILFDNSATDLDI -0.013217023 49.56		EYANSTEDCAAILFDNSATDLDIDV 0.41542981 63.85		FQEYANSTEDCAAILFDNSATDLDIDVVNE 0.43789653 64.60		FQEYANSTEDCAAILFDNSATDLDIDVVNE 0.18445867 56.15
STEDCAAILFDNSATDLDID 0.21027581 57.01		STEDCAAILFDNSATDLDID 0.13401429 54.47		YANSTEDCAAILFDNSATDLDIDVV 0.19730929 56.58		QEYANSTEDCAAILFDNSATDLDIDVVNEE 0.55950556 68.65		QEYANSTEDCAAILFDNSATDLDIDVVNEE 0.23429214 57.81
TEDCAAILFDNSATDLDIDV 0.20612972 56.87		TEDCAAILFDNSATDLDIDV 0.052424426 51.75		ANSTEDCAAILFDNSATDLDIDVVN 0.24771231 58.26		EYANSTEDCAAILFDNSATDLDIDVVNEEF 0.73561963 74.52		EYANSTEDCAAILFDNSATDLDIDVVNEEF 0.29743701 59.91
EDCAAILFDNSATDLDIDVV 0.044560198 51.49		EDCAAILFDNSATDLDIDVV -0.18265701 43.91		NSTEDCAAILFDNSATDLDIDVVNE 0.33400753 61.13		YANSTEDCAAILFDNSATDLDIDVVNEEFN 0.63461463 71.15		YANSTEDCAAILFDNSATDLDIDVVNEEFN 0.31567804 60.52
DCAAILFDNSATDLDIDVVN -0.15804244 44.73		DCAAILFDNSATDLDIDVVN -0.23796942 42.07		STEDCAAILFDNSATDLDIDVVNEE 0.60421598 70.14		ANSTEDCAAILFDNSATDLDIDVVNEEFNE 0.61162072 70.39		ANSTEDCAAILFDNSATDLDIDVVNEEFNE 0.27116704 59.04
CAAILFDNSATDLDIDVVNE -0.29452329 40.18		CAAILFDNSATDLDIDVVNE -0.18176213 43.94		TEDCAAILFDNSATDLDIDVVNEEF 0.79411781 76.47		NSTEDCAAILFDNSATDLDIDVVNEEFNEL 0.75065785 75.02		NSTEDCAAILFDNSATDLDIDVVNEEFNEL 0.36855405 62.29
AAILFDNSATDLDIDVVNEE -0.031119007 48.96		AAILFDNSATDLDIDVVNEE -0.063912584 47.87		EDCAAILFDNSATDLDIDVVNEEFN 0.88642869 79.55		STEDCAAILFDNSATDLDIDVVNEEFNELK 0.93281923 81.09		STEDCAAILFDNSATDLDIDVVNEEFNELK 0.41111267 63.70
AILFDNSATDLDIDVVNEEF 0.012734218 50.42		AILFDNSATDLDIDVVNEEF 0.14550378 54.85		DCAAILFDNSATDLDIDVVNEEFNE 0.70381747 73.46		TEDCAAILFDNSATDLDIDVVNEEFNELKE 0.91586729 80.53		TEDCAAILFDNSATDLDIDVVNEEFNELKE 0.39715275 63.24
ILFDNSATDLDIDVVNEEFN -0.17143666 44.29		ILFDNSATDLDIDVVNEEFN 0.090838996 53.03		CAAILFDNSATDLDIDVVNEEFNEL 0.77068928 75.69		EDCAAILFDNSATDLDIDVVNEEFNELKEL 0.91188024 80.40		EDCAAILFDNSATDLDIDVVNEEFNELKEL 0.28783902 59.59
LFDNSATDLDIDVVNEEFNE -0.21322247 42.89		LFDNSATDLDIDVVNEEFNE 0.087688697 52.92		AAILFDNSATDLDIDVVNEEFNELK 0.8964301 79.88		DCAAILFDNSATDLDIDVVNEEFNELKELT 0.76925359 75.64		DCAAILFDNSATDLDIDVVNEEFNELKELT -0.053007715 48.23
FDNSATDLDIDVVNEEFNEL -0.21751983 42.75		FDNSATDLDIDVVNEEFNEL 0.00053255471 50.02		AILFDNSATDLDIDVVNEEFNELKE 0.81289668 77.10		CAAILFDNSATDLDIDVVNEEFNELKELTS 0.60242912 70.08		CAAILFDNSATDLDIDVVNEEFNELKELTS -0.13719407 45.43
DNSATDLDIDVVNEEFNELK -0.40206506 36.60		DNSATDLDIDVVNEEFNELK -0.083187199 47.23		ILFDNSATDLDIDVVNEEFNELKEL 0.72669902 74.22		AAILFDNSATDLDIDVVNEEFNELKELTSG 0.51902375 67.30		AAILFDNSATDLDIDVVNEEFNELKELTSG -0.025723589 49.14
NSATDLDIDVVNEEFNELKE -0.079471455 47.35		NSATDLDIDVVNEEFNELKE 0.28970353 59.66		LFDNSATDLDIDVVNEEFNELKELT 0.46832116 65.61		AILFDNSATDLDIDVVNEEFNELKELTSGL 0.5992546 69.98		AILFDNSATDLDIDVVNEEFNELKELTSGL -0.13684485 45.44
SATDLDIDVVNEEFNELKEL -0.17880485 44.04		SATDLDIDVVNEEFNELKEL 0.17033869 55.68		FDNSATDLDIDVVNEEFNELKELTS 0.34537488 61.51		ILFDNSATDLDIDVVNEEFNELKELTSGLK 0.59770815 69.92		ILFDNSATDLDIDVVNEEFNELKELTSGLK -0.19143048 43.62
ATDLDIDVVNEEFNELKELT -0.09960995 46.68		ATDLDIDVVNEEFNELKELT 0.13689959 54.56		DNSATDLDIDVVNEEFNELKELTSG 0.30803887 60.27		LFDNSATDLDIDVVNEEFNELKELTSGLKR 0.71511671 73.84		LFDNSATDLDIDVVNEEFNELKELTSGLKR -0.17127132 44.29
TDLDIDVVNEEFNELKELTS 0.036966979 51.23		TDLDIDVVNEEFNELKELTS 0.54575043 68.19		NSATDLDIDVVNEEFNELKELTSGL 0.29494804 59.83		FDNSATDLDIDVVNEEFNELKELTSGLKRL 0.77815418 75.94		FDNSATDLDIDVVNEEFNELKELTSGLKRL -0.091572587 46.95
DLDIDVVNEEFNELKELTSG -0.18733056 43.76		DLDIDVVNEEFNELKELTSG 0.10152221 53.38		SATDLDIDVVNEEFNELKELTSGLK 0.28215037 59.41		DNSATDLDIDVVNEEFNELKELTSGLKRLN 0.71538999 73.85		DNSATDLDIDVVNEEFNELKELTSGLKRLN -0.22859791 42.38
LDIDVVNEEFNELKELTSGL -0.32876209 39.04		LDIDVVNEEFNELKELTSGL 0.16243137 55.41		ATDLDIDVVNEEFNELKELTSGLKR 0.50119966 66.71		NSATDLDIDVVNEEFNELKELTSGLKRLNL 0.85028145 78.34		NSATDLDIDVVNEEFNELKELTSGLKRLNL -0.15030371 44.99
DIDVVNEEFNELKELTSGLK -0.34018938 38.66		DIDVVNEEFNELKELTSGLK -0.093819709 46.87		TDLDIDVVNEEFNELKELTSGLKRL 0.66624052 72.21		SATDLDIDVVNEEFNELKELTSGLKRLNLS 0.83271265 77.76		SATDLDIDVVNEEFNELKELTSGLKRLNLS -0.12280086 45.91
IDVVNEEFNELKELTSGLKR -0.014135926 49.53		IDVVNEEFNELKELTSGLKR 0.2676828 58.92		DLDIDVVNEEFNELKELTSGLKRLN 0.61440331 70.48		ATDLDIDVVNEEFNELKELTSGLKRLNLSK 0.84947017 78.32		ATDLDIDVVNEEFNELKELTSGLKRLNLSK -0.11212672 46.26
DVVNEEFNELKELTSGLKRL 0.076250239 52.54		DVVNEEFNELKELTSGLKRL 0.36410049 62.14		LDIDVVNEEFNELKELTSGLKRLNL 0.66240613 72.08		TDLDIDVVNEEFNELKELTSGLKRLNLSKV 0.97271647 82.42		TDLDIDVVNEEFNELKELTSGLKRLNLSKV -0.020614945 49.31
VVNEEFNELKELTSGLKRLN 0.16980755 55.66		VVNEEFNELKELTSGLKRLN 0.65394048 71.80		DIDVVNEEFNELKELTSGLKRLNLS 0.59245033 69.75		DLDIDVVNEEFNELKELTSGLKRLNLSKVA 0.9045481 80.15		DLDIDVVNEEFNELKELTSGLKRLNLSKVA 0.13278459 54.43
VNEEFNELKELTSGLKRLNL 0.070276915 52.34		VNEEFNELKELTSGLKRLNL 0.18193208 56.06		IDVVNEEFNELKELTSGLKRLNLSK 0.67948059 72.65		LDIDVVNEEFNELKELTSGLKRLNLSKVAN 0.77858738 75.95		LDIDVVNEEFNELKELTSGLKRLNLSKVAN -0.13820756 45.39
NEEFNELKELTSGLKRLNLS -0.18863366 43.71		NEEFNELKELTSGLKRLNLS -0.15267928 44.91		DVVNEEFNELKELTSGLKRLNLSKV 0.68256554 72.75		DIDVVNEEFNELKELTSGLKRLNLSKVANA 0.67278322 72.43		DIDVVNEEFNELKELTSGLKRLNLSKVANA -0.11304566 46.23
EEFNELKELTSGLKRLNLSK -0.067951392 47.73		EEFNELKELTSGLKRLNLSK -0.34136939 38.62		VVNEEFNELKELTSGLKRLNLSKVA 0.81658047 77.22		IDVVNEEFNELKELTSGLKRLNLSKVANAI 0.67410041 72.47		IDVVNEEFNELKELTSGLKRLNLSKVANAI -0.11984565 46.01
EFNELKELTSGLKRLNLSKV 0.0258635 50.86		EFNELKELTSGLKRLNLSKV -0.41885164 36.04		VNEEFNELKELTSGLKRLNLSKVAN 0.578177 69.27		DVVNEEFNELKELTSGLKRLNLSKVANAIF 0.63760935 71.25		DVVNEEFNELKELTSGLKRLNLSKVANAIF -0.026104397 49.13
FNELKELTSGLKRLNLSKVA 0.17541175 55.85		FNELKELTSGLKRLNLSKVA -0.046098641 48.46		NEEFNELKELTSGLKRLNLSKVANA 0.1977492 56.59		VVNEEFNELKELTSGLKRLNLSKVANAIFS 0.65589975 71.86		VVNEEFNELKELTSGLKRLNLSKVANAIFS -0.045086499 48.50
NELKELTSGLKRLNLSKVAN 0.030036782 51.00		NELKELTSGLKRLNLSKVAN 0.022675678 50.76		EEFNELKELTSGLKRLNLSKVANAI 0.17571986 55.86		VNEEFNELKELTSGLKRLNLSKVANAIFSP 0.51440747 67.15		VNEEFNELKELTSGLKRLNLSKVANAIFSP 0.065677776 52.19
ELKELTSGLKRLNLSKVANA 0.058923447 51.96		ELKELTSGLKRLNLSKVANA -0.091240941 46.96		EFNELKELTSGLKRLNLSKVANAIF 0.076691474 52.56		NEEFNELKELTSGLKRLNLSKVANAIFSPL 0.33946091 61.32		NEEFNELKELTSGLKRLNLSKVANAIFSPL 0.2188678 57.30
LKELTSGLKRLNLSKVANAI 0.14641067 54.88		LKELTSGLKRLNLSKVANAI 0.12387519 54.13		FNELKELTSGLKRLNLSKVANAIFS -0.040861838 48.64		EEFNELKELTSGLKRLNLSKVANAIFSPLS 0.24894971 58.30		EEFNELKELTSGLKRLNLSKVANAIFSPLS 0.36258582 62.09
KELTSGLKRLNLSKVANAIF 0.028050085 50.94		KELTSGLKRLNLSKVANAIF 0.015180482 50.51		NELKELTSGLKRLNLSKVANAIFSP -0.075495567 47.48		EFNELKELTSGLKRLNLSKVANAIFSPLSN 0.022341598 50.74		EFNELKELTSGLKRLNLSKVANAIFSPLSN 0.16558032 55.52
ELTSGLKRLNLSKVANAIFS -0.1240126 45.87		ELTSGLKRLNLSKVANAIFS -0.39253401 36.92		ELKELTSGLKRLNLSKVANAIFSPL -0.18126372 43.96		FNELKELTSGLKRLNLSKVANAIFSPLSNV -0.21611449 42.80		FNELKELTSGLKRLNLSKVANAIFSPLSNV 0.11590872 53.86
LTSGLKRLNLSKVANAIFSP -0.29207941 40.26		LTSGLKRLNLSKVANAIFSP -0.40744448 36.42		LKELTSGLKRLNLSKVANAIFSPLS -0.23353069 42.22		NELKELTSGLKRLNLSKVANAIFSPLSNVA -0.079242502 47.36		NELKELTSGLKRLNLSKVANAIFSPLSNVA 0.076571549 52.55
TSGLKRLNLSKVANAIFSPL -0.23482379 42.17		TSGLKRLNLSKVANAIFSPL -0.53327332 32.22		KELTSGLKRLNLSKVANAIFSPLSN -0.061324781 47.96		ELKELTSGLKRLNLSKVANAIFSPLSNVAG -0.21930611 42.69		ELKELTSGLKRLNLSKVANAIFSPLSNVAG 0.076783057 52.56
SGLKRLNLSKVANAIFSPLS -0.14087692 45.30		SGLKRLNLSKVANAIFSPLS -0.2421379 41.93		ELTSGLKRLNLSKVANAIFSPLSNV -0.13423157 45.53		LKELTSGLKRLNLSKVANAIFSPLSNVAGT -0.10602735 46.47		LKELTSGLKRLNLSKVANAIFSPLSNVAGT 0.15766016 55.26
GLKRLNLSKVANAIFSPLSN -0.10468514 46.51		GLKRLNLSKVANAIFSPLSN 0.011560445 50.39		LTSGLKRLNLSKVANAIFSPLSNVA -0.29485775 40.17		KELTSGLKRLNLSKVANAIFSPLSNVAGTS -0.077093555 47.43		KELTSGLKRLNLSKVANAIFSPLSNVAGTS 0.040377447 51.35
LKRLNLSKVANAIFSPLSNV -0.11699646 46.10		LKRLNLSKVANAIFSPLSNV 0.25181735 58.39		TSGLKRLNLSKVANAIFSPLSNVAG -0.31477833 39.51		ELTSGLKRLNLSKVANAIFSPLSNVAGTSR 0.054911249 51.83		ELTSGLKRLNLSKVANAIFSPLSNVAGTSR 0.10918032 53.64
KRLNLSKVANAIFSPLSNVA -0.0026702211 49.91		KRLNLSKVANAIFSPLSNVA 0.48215905 66.07		SGLKRLNLSKVANAIFSPLSNVAGT -0.2398986 42.00		LTSGLKRLNLSKVANAIFSPLSNVAGTSRI -0.081105974 47.30		LTSGLKRLNLSKVANAIFSPLSNVAGTSRI 0.031486653 51.05
RLNLSKVANAIFSPLSNVAG -0.2698668 41.00		RLNLSKVANAIFSPLSNVAG 0.06831181 52.28		GLKRLNLSKVANAIFSPLSNVAGTS -0.26117043 41.29		TSGLKRLNLSKVANAIFSPLSNVAGTSRIS 0.013414962 50.45		TSGLKRLNLSKVANAIFSPLSNVAGTSRIS 0.031465693 51.05
LNLSKVANAIFSPLSNVAGT -0.20678659 43.11		LNLSKVANAIFSPLSNVAGT -0.041319231 48.62		LKRLNLSKVANAIFSPLSNVAGTSR -0.02058108 49.31		SGLKRLNLSKVANAIFSPLSNVAGTSRISR 0.30359153 60.12		SGLKRLNLSKVANAIFSPLSNVAGTSRISR 0.27027557 59.01
NLSKVANAIFSPLSNVAGTS -0.51734337 32.76		NLSKVANAIFSPLSNVAGTS -0.45878452 34.71		KRLNLSKVANAIFSPLSNVAGTSRI 0.0034037129 50.11		GLKRLNLSKVANAIFSPLSNVAGTSRISRG 0.34917683 61.64		GLKRLNLSKVANAIFSPLSNVAGTSRISRG 0.28094372 59.36
LSKVANAIFSPLSNVAGTSR -0.36744812 37.75		LSKVANAIFSPLSNVAGTSR -0.32064544 39.31		RLNLSKVANAIFSPLSNVAGTSRIS -0.043701727 48.54		LKRLNLSKVANAIFSPLSNVAGTSRISRGV 0.35356701 61.79		LKRLNLSKVANAIFSPLSNVAGTSRISRGV 0.38909589 62.97
SKVANAIFSPLSNVAGTSRI -0.58336827 30.55		SKVANAIFSPLSNVAGTSRI -0.47240683 34.25		LNLSKVANAIFSPLSNVAGTSRISR 0.28688351 59.56		KRLNLSKVANAIFSPLSNVAGTSRISRGVG 0.57713331 69.24		KRLNLSKVANAIFSPLSNVAGTSRISRGVG 0.37253695 62.42
KVANAIFSPLSNVAGTSRIS -0.79110849 23.63		KVANAIFSPLSNVAGTSRIS -0.44901247 35.03		NLSKVANAIFSPLSNVAGTSRISRG 0.20803872 56.93		RLNLSKVANAIFSPLSNVAGTSRISRGVGM 0.43883953 64.63		RLNLSKVANAIFSPLSNVAGTSRISRGVGM 0.30220247 60.07
VANAIFSPLSNVAGTSRISR -0.44230419 35.26		VANAIFSPLSNVAGTSRISR -0.11881097 46.04		LSKVANAIFSPLSNVAGTSRISRGV 0.10481334 53.49		LNLSKVANAIFSPLSNVAGTSRISRGVGMN 0.31992824 60.66		LNLSKVANAIFSPLSNVAGTSRISRGVGMN 0.20928913 56.98
ANAIFSPLSNVAGTSRISRG -0.3377691 38.74		ANAIFSPLSNVAGTSRISRG -0.074078408 47.53		SKVANAIFSPLSNVAGTSRISRGVG 0.14845938 54.95		NLSKVANAIFSPLSNVAGTSRISRGVGMNW 0.30580845 60.19		NLSKVANAIFSPLSNVAGTSRISRGVGMNW 0.38896768 62.97
NAIFSPLSNVAGTSRISRGV -0.38336975 37.22		NAIFSPLSNVAGTSRISRGV -0.28510379 40.50		KVANAIFSPLSNVAGTSRISRGVGM -0.079235852 47.36		LSKVANAIFSPLSNVAGTSRISRGVGMNWA 0.3212383 60.71		LSKVANAIFSPLSNVAGTSRISRGVGMNWA 0.38006586 62.67
AIFSPLSNVAGTSRISRGVG -0.39945137 36.68		AIFSPLSNVAGTSRISRGVG -0.53176003 32.27		VANAIFSPLSNVAGTSRISRGVGMN -0.018966863 49.37		SKVANAIFSPLSNVAGTSRISRGVGMNWAT 0.30114279 60.04		SKVANAIFSPLSNVAGTSRISRGVGMNWAT 0.29351645 59.78
IFSPLSNVAGTSRISRGVGM -0.3417398 38.61		IFSPLSNVAGTSRISRGVGM -0.54366206 31.88		ANAIFSPLSNVAGTSRISRGVGMNW 0.054168744 51.81		KVANAIFSPLSNVAGTSRISRGVGMNWATY 0.2805294 59.35		KVANAIFSPLSNVAGTSRISRGVGMNWATY 0.35762353 61.92
FSPLSNVAGTSRISRGVGMN -0.1807578 43.97		FSPLSNVAGTSRISRGVGMN -0.40335476 36.55		NAIFSPLSNVAGTSRISRGVGMNWA 0.027625735 50.92		VANAIFSPLSNVAGTSRISRGVGMNWATYD 0.22767796 57.59		VANAIFSPLSNVAGTSRISRGVGMNWATYD 0.27609358 59.20
SPLSNVAGTSRISRGVGMNW -0.34042404 38.65		SPLSNVAGTSRISRGVGMNW -0.4851626 33.83		AIFSPLSNVAGTSRISRGVGMNWAT 0.1504487 55.01		ANAIFSPLSNVAGTSRISRGVGMNWATYDK 0.41064257 63.69		ANAIFSPLSNVAGTSRISRGVGMNWATYDK 0.36398448 62.13
PLSNVAGTSRISRGVGMNWA -0.28930399 40.36		PLSNVAGTSRISRGVGMNWA -0.3214179 39.29		IFSPLSNVAGTSRISRGVGMNWATY 0.20475488 56.83		NAIFSPLSNVAGTSRISRGVGMNWATYDKD 0.49439822 66.48		NAIFSPLSNVAGTSRISRGVGMNWATYDKD 0.56702826 68.90
LSNVAGTSRISRGVGMNWAT -0.16381216 44.54		LSNVAGTSRISRGVGMNWAT 0.033633008 51.12		FSPLSNVAGTSRISRGVGMNWATYD -0.029980056 49.00		AIFSPLSNVAGTSRISRGVGMNWATYDKDS 0.50419526 66.81		AIFSPLSNVAGTSRISRGVGMNWATYDKDS 0.56902086 68.97
SNVAGTSRISRGVGMNWATY -0.31449947 39.52		SNVAGTSRISRGVGMNWATY -0.35440401 38.19		SPLSNVAGTSRISRGVGMNWATYDK 0.060483718 52.02		IFSPLSNVAGTSRISRGVGMNWATYDKDSG 0.49680499 66.56		IFSPLSNVAGTSRISRGVGMNWATYDKDSG 0.53352635 67.78
NVAGTSRISRGVGMNWATYD -0.4372814 35.42		NVAGTSRISRGVGMNWATYD -0.50377294 33.21		PLSNVAGTSRISRGVGMNWATYDKD 0.12889149 54.30		FSPLSNVAGTSRISRGVGMNWATYDKDSGM 0.38545701 62.85		FSPLSNVAGTSRISRGVGMNWATYDKDSGM 0.43743587 64.58
VAGTSRISRGVGMNWATYDK -0.3949332 36.84		VAGTSRISRGVGMNWATYDK -0.44747678 35.08		LSNVAGTSRISRGVGMNWATYDKDS 0.26515346 58.84		SPLSNVAGTSRISRGVGMNWATYDKDSGMC 0.31713695 60.57		SPLSNVAGTSRISRGVGMNWATYDKDSGMC 0.40986403 63.66
AGTSRISRGVGMNWATYDKD -0.085168265 47.16		AGTSRISRGVGMNWATYDKD -0.083908596 47.20		SNVAGTSRISRGVGMNWATYDKDSG 0.10977035 53.66		PLSNVAGTSRISRGVGMNWATYDKDSGMCA 0.26698521 58.90		PLSNVAGTSRISRGVGMNWATYDKDSGMCA 0.19482313 56.49
GTSRISRGVGMNWATYDKDS -0.02717242 49.09		GTSRISRGVGMNWATYDKDS 0.034150645 51.14		NVAGTSRISRGVGMNWATYDKDSGM -0.12600553 45.80		LSNVAGTSRISRGVGMNWATYDKDSGMCAL 0.24064975 58.02		LSNVAGTSRISRGVGMNWATYDKDSGMCAL -0.087310526 47.09
TSRISRGVGMNWATYDKDSG -0.46288687 34.57		TSRISRGVGMNWATYDKDSG -0.25515072 41.49		VAGTSRISRGVGMNWATYDKDSGMC -0.29052457 40.32		SNVAGTSRISRGVGMNWATYDKDSGMCALI -0.017242716 49.43		SNVAGTSRISRGVGMNWATYDKDSGMCALI -0.029174091 49.03
SRISRGVGMNWATYDKDSGM -0.49519626 33.49		SRISRGVGMNWATYDKDSGM -0.30590472 39.80		AGTSRISRGVGMNWATYDKDSGMCA -0.29573999 40.14		NVAGTSRISRGVGMNWATYDKDSGMCALIN 0.060755133 52.03		NVAGTSRISRGVGMNWATYDKDSGMCALIN 0.055876028 51.86
RISRGVGMNWATYDKDSGMC -0.81375869 22.87		RISRGVGMNWATYDKDSGMC -0.63181077 28.94		GTSRISRGVGMNWATYDKDSGMCAL -0.21662762 42.78		VAGTSRISRGVGMNWATYDKDSGMCALINE 0.11238727 53.75		VAGTSRISRGVGMNWATYDKDSGMCALINE 0.12289904 54.10
ISRGVGMNWATYDKDSGMCA -0.63825861 28.72		ISRGVGMNWATYDKDSGMCA -0.58183083 30.61		TSRISRGVGMNWATYDKDSGMCALI -0.46483193 34.51		AGTSRISRGVGMNWATYDKDSGMCALINET 0.034466225 51.15		AGTSRISRGVGMNWATYDKDSGMCALINET 0.20348816 56.78
SRGVGMNWATYDKDSGMCAL -0.75030445 24.99		SRGVGMNWATYDKDSGMCAL -0.66486737 27.84		SRISRGVGMNWATYDKDSGMCALIN -0.28992871 40.34		GTSRISRGVGMNWATYDKDSGMCALINETP 0.087911714 52.93		GTSRISRGVGMNWATYDKDSGMCALINETP 0.28171416 59.39
RGVGMNWATYDKDSGMCALI -0.88307058 20.56		RGVGMNWATYDKDSGMCALI -0.83647443 22.12		RISRGVGMNWATYDKDSGMCALINE -0.349468 38.35		TSRISRGVGMNWATYDKDSGMCALINETPN 0.14051506 54.68		TSRISRGVGMNWATYDKDSGMCALINETPN 0.43899552 64.63
GVGMNWATYDKDSGMCALIN -0.92952769 19.02		GVGMNWATYDKDSGMCALIN -1.00513 16.50		ISRGVGMNWATYDKDSGMCALINET -0.36643266 37.79		SRISRGVGMNWATYDKDSGMCALINETPNC 0.334925 61.16		SRISRGVGMNWATYDKDSGMCALINETPNC 0.57644839 69.21
VGMNWATYDKDSGMCALINE -0.7860175 23.80		VGMNWATYDKDSGMCALINE -0.72300334 25.90		SRGVGMNWATYDKDSGMCALINETP -0.20309414 43.23		RISRGVGMNWATYDKDSGMCALINETPNCL 0.24151855 58.05		RISRGVGMNWATYDKDSGMCALINETPNCL 0.40942268 63.65
GMNWATYDKDSGMCALINET -0.65883296 28.04		GMNWATYDKDSGMCALINET -0.67442196 27.52		RGVGMNWATYDKDSGMCALINETPN -0.22688095 42.44		ISRGVGMNWATYDKDSGMCALINETPNCLI 0.24181478 58.06		ISRGVGMNWATYDKDSGMCALINETPNCLI 0.57578345 69.19
MNWATYDKDSGMCALINETP -0.59958282 30.01		MNWATYDKDSGMCALINETP -0.48510269 33.83		GVGMNWATYDKDSGMCALINETPNC -0.42999636 35.67		SRGVGMNWATYDKDSGMCALINETPNCLIL 0.3906452 63.02		SRGVGMNWATYDKDSGMCALINETPNCLIL 0.63863584 71.29
NWATYDKDSGMCALINETPN -0.55917443 31.36		NWATYDKDSGMCALINETPN -0.60586888 29.80		VGMNWATYDKDSGMCALINETPNCL -0.28653215 40.45		RGVGMNWATYDKDSGMCALINETPNCLILN 0.23354793 57.78		RGVGMNWATYDKDSGMCALINETPNCLILN 0.42961548 64.32
WATYDKDSGMCALINETPNC -0.2948401 40.17		WATYDKDSGMCALINETPNC -0.37819251 37.39		GMNWATYDKDSGMCALINETPNCLI -0.35236527 38.25		GVGMNWATYDKDSGMCALINETPNCLILNA 0.07052372 52.35		GVGMNWATYDKDSGMCALINETPNCLILNA 0.35303494 61.77
ATYDKDSGMCALINETPNCL -0.29893207 40.04		ATYDKDSGMCALINETPNCL -0.52211413 32.60		MNWATYDKDSGMCALINETPNCLIL -0.19713228 43.43		VGMNWATYDKDSGMCALINETPNCLILNAG 0.11179107 53.73		VGMNWATYDKDSGMCALINETPNCLILNAG 0.229686 57.66
TYDKDSGMCALINETPNCLI -0.45883406 34.71		TYDKDSGMCALINETPNCLI -0.56495265 31.17		NWATYDKDSGMCALINETPNCLILN -0.19828287 43.39		GMNWATYDKDSGMCALINETPNCLILNAGS -0.14573959 45.14		GMNWATYDKDSGMCALINETPNCLILNAGS 0.30954541 60.32
YDKDSGMCALINETPNCLIL -0.37655234 37.45		YDKDSGMCALINETPNCLIL -0.53003171 32.33		WATYDKDSGMCALINETPNCLILNA -0.042985697 48.57		MNWATYDKDSGMCALINETPNCLILNAGSI -0.099657502 46.68		MNWATYDKDSGMCALINETPNCLILNAGSI 0.40490718 63.50
DKDSGMCALINETPNCLILN -0.35584378 38.14		DKDSGMCALINETPNCLILN -0.44666884 35.11		ATYDKDSGMCALINETPNCLILNAG -0.22727157 42.42		NWATYDKDSGMCALINETPNCLILNAGSIA 0.027333866 50.91		NWATYDKDSGMCALINETPNCLILNAGSIA 0.33228048 61.08
KDSGMCALINETPNCLILNA -0.37002137 37.67		KDSGMCALINETPNCLILNA -0.34057315 38.65		TYDKDSGMCALINETPNCLILNAGS -0.43833241 35.39		WATYDKDSGMCALINETPNCLILNAGSIAL 0.011693238 50.39		WATYDKDSGMCALINETPNCLILNAGSIAL 0.20937075 56.98
DSGMCALINETPNCLILNAG -0.7141104 26.20		DSGMCALINETPNCLILNAG -0.84308916 21.90		YDKDSGMCALINETPNCLILNAGSI -0.6112577 29.62		ATYDKDSGMCALINETPNCLILNAGSIALT -0.15344477 44.89		ATYDKDSGMCALINETPNCLILNAGSIALT 0.067473415 52.25
SGMCALINETPNCLILNAGS -0.76599837 24.47		SGMCALINETPNCLILNAGS -0.89487076 20.17		DKDSGMCALINETPNCLILNAGSIA -0.51928915 32.69		TYDKDSGMCALINETPNCLILNAGSIALTA -0.15286505 44.90		TYDKDSGMCALINETPNCLILNAGSIALTA 0.21119854 57.04
GMCALINETPNCLILNAGSI -0.74690361 25.10		GMCALINETPNCLILNAGSI -0.79243619 23.59		KDSGMCALINETPNCLILNAGSIAL -0.75021414 24.99		YDKDSGMCALINETPNCLILNAGSIALTAI -0.33123502 38.96		YDKDSGMCALINETPNCLILNAGSIALTAI 0.17365549 55.79
MCALINETPNCLILNAGSIA -0.67326566 27.56		MCALINETPNCLILNAGSIA -0.46444972 34.52		DSGMCALINETPNCLILNAGSIALT -0.80538477 23.15		DKDSGMCALINETPNCLILNAGSIALTAIG -0.39340278 36.89		DKDSGMCALINETPNCLILNAGSIALTAIG 0.2087778 56.96
CALINETPNCLILNAGSIAL -0.45018623 34.99		CALINETPNCLILNAGSIAL -0.49133674 33.62		SGMCALINETPNCLILNAGSIALTA -0.77268945 24.24		KDSGMCALINETPNCLILNAGSIALTAIGS -0.63130673 28.96		KDSGMCALINETPNCLILNAGSIALTAIGS 0.21641229 57.21
ALINETPNCLILNAGSIALT -0.42437855 35.85		ALINETPNCLILNAGSIALT -0.52112705 32.63		GMCALINETPNCLILNAGSIALTAI -0.84453643 21.85		DSGMCALINETPNCLILNAGSIALTAIGSP -0.68955044 27.01		DSGMCALINETPNCLILNAGSIALTAIGSP 0.20764759 56.92
LINETPNCLILNAGSIALTA -0.46367273 34.54		LINETPNCLILNAGSIALTA -0.28477485 40.51		MCALINETPNCLILNAGSIALTAIG -0.84505693 21.83		SGMCALINETPNCLILNAGSIALTAIGSPL -0.64609318 28.46		SGMCALINETPNCLILNAGSIALTAIGSPL 0.40962395 63.65
INETPNCLILNAGSIALTAI -0.36118229 37.96		INETPNCLILNAGSIALTAI -0.39803968 36.73		CALINETPNCLILNAGSIALTAIGS -0.8861319 20.46		GMCALINETPNCLILNAGSIALTAIGSPLE -0.64260881 28.58		GMCALINETPNCLILNAGSIALTAIGSPLE 0.44211253 64.74
NETPNCLILNAGSIALTAIG -0.33027425 38.99		NETPNCLILNAGSIALTAIG -0.44685731 35.10		ALINETPNCLILNAGSIALTAIGSP -0.99160417 16.95		MCALINETPNCLILNAGSIALTAIGSPLEY -0.47370412 34.21		MCALINETPNCLILNAGSIALTAIGSPLEY 0.46975432 65.66
ETPNCLILNAGSIALTAIGS -0.14368096 45.21		ETPNCLILNAGSIALTAIGS -0.5532495 31.56		LINETPNCLILNAGSIALTAIGSPL -1.0099931 16.33		CALINETPNCLILNAGSIALTAIGSPLEYD -0.39850289 36.72		CALINETPNCLILNAGSIALTAIGSPLEYD 0.39348855 63.12
TPNCLILNAGSIALTAIGSP -0.090617411 46.98		TPNCLILNAGSIALTAIGSP -0.546958 31.77		INETPNCLILNAGSIALTAIGSPLE -0.80343124 23.22		ALINETPNCLILNAGSIALTAIGSPLEYDA -0.40754365 36.42		ALINETPNCLILNAGSIALTAIGSPLEYDA 0.53212404 67.74
PNCLILNAGSIALTAIGSPL -0.15093313 44.97		PNCLILNAGSIALTAIGSPL -0.75699429 24.77		NETPNCLILNAGSIALTAIGSPLEY -0.47693431 34.10		LINETPNCLILNAGSIALTAIGSPLEYDAV -0.35460868 38.18		LINETPNCLILNAGSIALTAIGSPLEYDAV 0.57553367 69.18
NCLILNAGSIALTAIGSPLE -0.22303042 42.57		NCLILNAGSIALTAIGSPLE -0.57831927 30.72		ETPNCLILNAGSIALTAIGSPLEYD -0.47147397 34.28		INETPNCLILNAGSIALTAIGSPLEYDAVN -0.16167731 44.61		INETPNCLILNAGSIALTAIGSPLEYDAVN 0.58204907 69.40
CLILNAGSIALTAIGSPLEY -0.32857262 39.05		CLILNAGSIALTAIGSPLEY -0.82766446 22.41		TPNCLILNAGSIALTAIGSPLEYDA -0.31423545 39.53		NETPNCLILNAGSIALTAIGSPLEYDAVNY -0.15913828 44.70		NETPNCLILNAGSIALTAIGSPLEYDAVNY 0.81662301 77.22
LILNAGSIALTAIGSPLEYD -0.33854115 38.72		LILNAGSIALTAIGSPLEYD -0.75565086 24.81		PNCLILNAGSIALTAIGSPLEYDAV -0.51716606 32.76		ETPNCLILNAGSIALTAIGSPLEYDAVNYP -0.21148503 42.95		ETPNCLILNAGSIALTAIGSPLEYDAVNYP 0.97446185 82.48
ILNAGSIALTAIGSPLEYDA -0.096097918 46.80		ILNAGSIALTAIGSPLEYDA -0.48866349 33.71		NCLILNAGSIALTAIGSPLEYDAVN -0.48415023 33.86		TPNCLILNAGSIALTAIGSPLEYDAVNYPC -0.18254295 43.92		TPNCLILNAGSIALTAIGSPLEYDAVNYPC 1.1016752 86.72
LNAGSIALTAIGSPLEYDAV -0.11469979 46.18		LNAGSIALTAIGSPLEYDAV -0.42997238 35.67		CLILNAGSIALTAIGSPLEYDAVNY -0.59364532 30.21		PNCLILNAGSIALTAIGSPLEYDAVNYPCH -0.34439784 38.52		PNCLILNAGSIALTAIGSPLEYDAVNYPCH 1.1744993 89.15
NAGSIALTAIGSPLEYDAVN 0.027185892 50.91		NAGSIALTAIGSPLEYDAVN -0.25988196 41.34		LILNAGSIALTAIGSPLEYDAVNYP -0.54104138 31.97		NCLILNAGSIALTAIGSPLEYDAVNYPCHI -0.44029858 35.32		NCLILNAGSIALTAIGSPLEYDAVNYPCHI 0.94576586 81.53
AGSIALTAIGSPLEYDAVNY -0.16785131 44.40		AGSIALTAIGSPLEYDAVNY -0.48092809 33.97		ILNAGSIALTAIGSPLEYDAVNYPC -0.38992207 37.00		CLILNAGSIALTAIGSPLEYDAVNYPCHID -0.48191548 33.94		CLILNAGSIALTAIGSPLEYDAVNYPCHID 0.82499061 77.50
GSIALTAIGSPLEYDAVNYP -0.0042534245 49.86		GSIALTAIGSPLEYDAVNYP -0.22148153 42.62		LNAGSIALTAIGSPLEYDAVNYPCH -0.21331946 42.89		LILNAGSIALTAIGSPLEYDAVNYPCHIDT -0.44544495 35.15		LILNAGSIALTAIGSPLEYDAVNYPCHIDT 0.88974626 79.66
SIALTAIGSPLEYDAVNYPC -0.24754351 41.75		SIALTAIGSPLEYDAVNYPC -0.51480301 32.84		NAGSIALTAIGSPLEYDAVNYPCHI -0.23819114 42.06		ILNAGSIALTAIGSPLEYDAVNYPCHIDTN -0.15870914 44.71		ILNAGSIALTAIGSPLEYDAVNYPCHIDTN 0.80434201 76.81
IALTAIGSPLEYDAVNYPCH -0.31589653 39.47		IALTAIGSPLEYDAVNYPCH -0.60426319 29.86		AGSIALTAIGSPLEYDAVNYPCHID -0.27360966 40.88		LNAGSIALTAIGSPLEYDAVNYPCHIDTNG -0.02070718 49.31		LNAGSIALTAIGSPLEYDAVNYPCHIDTNG 0.81062079 77.02
ALTAIGSPLEYDAVNYPCHI -0.12778187 45.74		ALTAIGSPLEYDAVNYPCHI -0.5957207 30.14		GSIALTAIGSPLEYDAVNYPCHIDT -0.17173889 44.28		NAGSIALTAIGSPLEYDAVNYPCHIDTNGY 0.062505511 52.08		NAGSIALTAIGSPLEYDAVNYPCHIDTNGY 0.93293105 81.10
LTAIGSPLEYDAVNYPCHID -0.18930227 43.69		LTAIGSPLEYDAVNYPCHID -0.58562535 30.48		SIALTAIGSPLEYDAVNYPCHIDTN 0.011555992 50.39		AGSIALTAIGSPLEYDAVNYPCHIDTNGYV -0.0059637449 49.80		AGSIALTAIGSPLEYDAVNYPCHIDTNGYV 0.99957406 83.32
TAIGSPLEYDAVNYPCHIDT -0.083725658 47.21		TAIGSPLEYDAVNYPCHIDT -0.55176032 31.61		IALTAIGSPLEYDAVNYPCHIDTNG 0.16389897 55.46		GSIALTAIGSPLEYDAVNYPCHIDTNGYVE 0.035659061 51.19		GSIALTAIGSPLEYDAVNYPCHIDTNGYVE 1.108669 86.96
AIGSPLEYDAVNYPCHIDTN -0.01828604 49.39		AIGSPLEYDAVNYPCHIDTN -0.6227243 29.24		ALTAIGSPLEYDAVNYPCHIDTNGY 0.22922377 57.64		SIALTAIGSPLEYDAVNYPCHIDTNGYVEP 0.16288997 55.43		SIALTAIGSPLEYDAVNYPCHIDTNGYVEP 1.203152 90.11
IGSPLEYDAVNYPCHIDTNG -0.059091925 48.03		IGSPLEYDAVNYPCHIDTNG -0.54821582 31.73		LTAIGSPLEYDAVNYPCHIDTNGYV 0.22264649 57.42		IALTAIGSPLEYDAVNYPCHIDTNGYVEPR 0.37350586 62.45		IALTAIGSPLEYDAVNYPCHIDTNGYVEPR 1.2680482 92.27
GSPLEYDAVNYPCHIDTNGY -0.19779715 43.41		GSPLEYDAVNYPCHIDTNGY -0.52507492 32.50		TAIGSPLEYDAVNYPCHIDTNGYVE 0.20879926 56.96		ALTAIGSPLEYDAVNYPCHIDTNGYVEPRA 0.42045636 64.02		ALTAIGSPLEYDAVNYPCHIDTNGYVEPRA 1.4273146 97.58
SPLEYDAVNYPCHIDTNGYV -0.24690731 41.77		SPLEYDAVNYPCHIDTNGYV -0.69643527 26.79		AIGSPLEYDAVNYPCHIDTNGYVEP 0.35083993 61.69		LTAIGSPLEYDAVNYPCHIDTNGYVEPRAK 0.43658556 64.55		LTAIGSPLEYDAVNYPCHIDTNGYVEPRAK 1.4764624 99.22
PLEYDAVNYPCHIDTNGYVE 0.012560786 50.42		PLEYDAVNYPCHIDTNGYVE -0.37484831 37.51		IGSPLEYDAVNYPCHIDTNGYVEPR 0.46351012 65.45		TAIGSPLEYDAVNYPCHIDTNGYVEPRAKT 0.50718208 66.91		TAIGSPLEYDAVNYPCHIDTNGYVEPRAKT 1.4829693 99.43
LEYDAVNYPCHIDTNGYVEP 0.05946391 51.98		LEYDAVNYPCHIDTNGYVEP -0.4728002 34.24		GSPLEYDAVNYPCHIDTNGYVEPRA 0.40884329 63.63		AIGSPLEYDAVNYPCHIDTNGYVEPRAKTT 0.54806943 68.27		AIGSPLEYDAVNYPCHIDTNGYVEPRAKTT 1.5162928 100.0
EYDAVNYPCHIDTNGYVEPR 0.21574779 57.19		EYDAVNYPCHIDTNGYVEPR -0.19110463 43.63		SPLEYDAVNYPCHIDTNGYVEPRAK 0.28242153 59.41		IGSPLEYDAVNYPCHIDTNGYVEPRAKTTN 0.71197167 73.73		IGSPLEYDAVNYPCHIDTNGYVEPRAKTTN 1.4009871 96.70
YDAVNYPCHIDTNGYVEPRA 0.34624769 61.54		YDAVNYPCHIDTNGYVEPRA 0.042411428 51.41		PLEYDAVNYPCHIDTNGYVEPRAKT 0.34786293 61.60		GSPLEYDAVNYPCHIDTNGYVEPRAKTTNK 0.74788395 74.93		GSPLEYDAVNYPCHIDTNGYVEPRAKTTNK 1.5767921 100.0
DAVNYPCHIDTNGYVEPRAK 0.50973764 66.99		DAVNYPCHIDTNGYVEPRAK 0.061872198 52.06		LEYDAVNYPCHIDTNGYVEPRAKTT 0.43351947 64.45		SPLEYDAVNYPCHIDTNGYVEPRAKTTNKY 0.79498261 76.50		SPLEYDAVNYPCHIDTNGYVEPRAKTTNKY 1.5233279 100.0
AVNYPCHIDTNGYVEPRAKT 0.48770413 66.26		AVNYPCHIDTNGYVEPRAKT 0.15555176 55.19		EYDAVNYPCHIDTNGYVEPRAKTTN 0.61797604 70.60		PLEYDAVNYPCHIDTNGYVEPRAKTTNKYL 0.89177005 79.73		PLEYDAVNYPCHIDTNGYVEPRAKTTNKYL 1.34786 94.93
VNYPCHIDTNGYVEPRAKTT 0.44106555 64.70		VNYPCHIDTNGYVEPRAKTT 0.32204237 60.73		YDAVNYPCHIDTNGYVEPRAKTTNK 0.64430844 71.48		LEYDAVNYPCHIDTNGYVEPRAKTTNKYLD 0.78742528 76.25		LEYDAVNYPCHIDTNGYVEPRAKTTNKYLD 1.1217316 87.39
NYPCHIDTNGYVEPRAKTTN 0.3996787 63.32		NYPCHIDTNGYVEPRAKTTN 0.30299404 60.10		DAVNYPCHIDTNGYVEPRAKTTNKY 0.73989791 74.66		EYDAVNYPCHIDTNGYVEPRAKTTNKYLDV 0.90297495 80.10		EYDAVNYPCHIDTNGYVEPRAKTTNKYLDV 1.0404702 84.68
YPCHIDTNGYVEPRAKTTNK 0.35909063 61.97		YPCHIDTNGYVEPRAKTTNK 0.2447565 58.16		AVNYPCHIDTNGYVEPRAKTTNKYL 0.81546124 77.18		YDAVNYPCHIDTNGYVEPRAKTTNKYLDVP 0.87470552 79.16		YDAVNYPCHIDTNGYVEPRAKTTNKYLDVP 1.0822485 86.07
PCHIDTNGYVEPRAKTTNKY 0.29889608 59.96		PCHIDTNGYVEPRAKTTNKY 0.24738496 58.25		VNYPCHIDTNGYVEPRAKTTNKYLD 0.81311711 77.10		DAVNYPCHIDTNGYVEPRAKTTNKYLDVPF 0.90488695 80.16		DAVNYPCHIDTNGYVEPRAKTTNKYLDVPF 1.1151205 87.17
CHIDTNGYVEPRAKTTNKYL 0.2140475 57.13		CHIDTNGYVEPRAKTTNKYL 0.27321415 59.11		NYPCHIDTNGYVEPRAKTTNKYLDV 0.74832844 74.94		AVNYPCHIDTNGYVEPRAKTTNKYLDVPFE 0.84368984 78.12		AVNYPCHIDTNGYVEPRAKTTNKYLDVPFE 1.1318566 87.73
HIDTNGYVEPRAKTTNKYLD 0.22789944 57.60		HIDTNGYVEPRAKTTNKYLD 0.4447648 64.83		YPCHIDTNGYVEPRAKTTNKYLDVP 0.53720597 67.91		VNYPCHIDTNGYVEPRAKTTNKYLDVPFEV 0.89490581 79.83		VNYPCHIDTNGYVEPRAKTTNKYLDVPFEV 1.3154583 93.85
IDTNGYVEPRAKTTNKYLDV 0.42151818 64.05		IDTNGYVEPRAKTTNKYLDV 0.54753046 68.25		PCHIDTNGYVEPRAKTTNKYLDVPF 0.53040228 67.68		NYPCHIDTNGYVEPRAKTTNKYLDVPFEVT 0.77593589 75.86		NYPCHIDTNGYVEPRAKTTNKYLDVPFEVT 1.2666127 92.22
DTNGYVEPRAKTTNKYLDVP 0.38369285 62.79		DTNGYVEPRAKTTNKYLDVP 0.3375092 61.25		CHIDTNGYVEPRAKTTNKYLDVPFE 0.50649462 66.88		YPCHIDTNGYVEPRAKTTNKYLDVPFEVTT 0.74185686 74.73		YPCHIDTNGYVEPRAKTTNKYLDVPFEVTT 1.1410998 88.04
TNGYVEPRAKTTNKYLDVPF 0.51410992 67.14		TNGYVEPRAKTTNKYLDVPF 0.53673759 67.89		HIDTNGYVEPRAKTTNKYLDVPFEV 0.61396621 70.47		PCHIDTNGYVEPRAKTTNKYLDVPFEVTTA 0.80542359 76.85		PCHIDTNGYVEPRAKTTNKYLDVPFEVTTA 1.055897 85.20
NGYVEPRAKTTNKYLDVPFE 0.33298336 61.10		NGYVEPRAKTTNKYLDVPFE 0.20226885 56.74		IDTNGYVEPRAKTTNKYLDVPFEVT 0.68037551 72.68		CHIDTNGYVEPRAKTTNKYLDVPFEVTTAL 0.80423932 76.81		CHIDTNGYVEPRAKTTNKYLDVPFEVTTAL 0.89656874 79.89
GYVEPRAKTTNKYLDVPFEV 0.50865368 66.96		GYVEPRAKTTNKYLDVPFEV 0.45469463 65.16		DTNGYVEPRAKTTNKYLDVPFEVTT 0.66253932 72.08		HIDTNGYVEPRAKTTNKYLDVPFEVTTALS 0.82258837 77.42		HIDTNGYVEPRAKTTNKYLDVPFEVTTALS 0.76777308 75.59
YVEPRAKTTNKYLDVPFEVT 0.37647033 62.55		YVEPRAKTTNKYLDVPFEVT 0.42214163 64.07		TNGYVEPRAKTTNKYLDVPFEVTTA 0.64865499 71.62		IDTNGYVEPRAKTTNKYLDVPFEVTTALSM 0.94357676 81.45		IDTNGYVEPRAKTTNKYLDVPFEVTTALSM 0.81483125 77.16
VEPRAKTTNKYLDVPFEVTT 0.10014344 53.34		VEPRAKTTNKYLDVPFEVTT 0.16648013 55.55		NGYVEPRAKTTNKYLDVPFEVTTAL 0.45953275 65.32		DTNGYVEPRAKTTNKYLDVPFEVTTALSMK 0.78535717 76.18		DTNGYVEPRAKTTNKYLDVPFEVTTALSMK 0.93761172 81.25
EPRAKTTNKYLDVPFEVTTA -0.049728562 48.34		EPRAKTTNKYLDVPFEVTTA -0.062111218 47.93		GYVEPRAKTTNKYLDVPFEVTTALS 0.4411266 64.70		TNGYVEPRAKTTNKYLDVPFEVTTALSMKT 0.64926935 71.64		TNGYVEPRAKTTNKYLDVPFEVTTALSMKT 0.92201797 80.73
PRAKTTNKYLDVPFEVTTAL -0.25168792 41.61		PRAKTTNKYLDVPFEVTTAL -0.1976244 43.41		YVEPRAKTTNKYLDVPFEVTTALSM 0.37565797 62.52		NGYVEPRAKTTNKYLDVPFEVTTALSMKTL 0.62574867 70.86		NGYVEPRAKTTNKYLDVPFEVTTALSMKTL 1.1319235 87.73
RAKTTNKYLDVPFEVTTALS -0.48988739 33.67		RAKTTNKYLDVPFEVTTALS -0.2906399 40.31		VEPRAKTTNKYLDVPFEVTTALSMK 0.28449602 59.48		GYVEPRAKTTNKYLDVPFEVTTALSMKTLK 0.70411528 73.47		GYVEPRAKTTNKYLDVPFEVTTALSMKTLK 1.1521019 88.40
AKTTNKYLDVPFEVTTALSM -0.59581469 30.14		AKTTNKYLDVPFEVTTALSM -0.30624477 39.79		EPRAKTTNKYLDVPFEVTTALSMKT 0.099009567 53.30		YVEPRAKTTNKYLDVPFEVTTALSMKTLKC 0.67794331 72.60		YVEPRAKTTNKYLDVPFEVTTALSMKTLKC 1.1461972 88.21
KTTNKYLDVPFEVTTALSMK -0.52621302 32.46		KTTNKYLDVPFEVTTALSMK -0.20162161 43.28		PRAKTTNKYLDVPFEVTTALSMKTL 0.13144166 54.38		VEPRAKTTNKYLDVPFEVTTALSMKTLKCN 0.70067786 73.36		VEPRAKTTNKYLDVPFEVTTALSMKTLKCN 1.0945676 86.49
TTNKYLDVPFEVTTALSMKT -0.52621302 32.46		TTNKYLDVPFEVTTALSMKT -0.20162161 43.28		RAKTTNKYLDVPFEVTTALSMKTLK 0.15332885 55.11		EPRAKTTNKYLDVPFEVTTALSMKTLKCNA 0.57863034 69.29		EPRAKTTNKYLDVPFEVTTALSMKTLKCNA 1.0905972 86.35
TNKYLDVPFEVTTALSMKTL -0.35675183 38.11		TNKYLDVPFEVTTALSMKTL 0.20377435 56.79		AKTTNKYLDVPFEVTTALSMKTLKC 0.21093584 57.03		PRAKTTNKYLDVPFEVTTALSMKTLKCNAY 0.62991178 71.00		PRAKTTNKYLDVPFEVTTALSMKTLKCNAY 1.0501884 85.01
NKYLDVPFEVTTALSMKTLK -0.45532436 34.82		NKYLDVPFEVTTALSMKTLK 0.21203512 57.07		KTTNKYLDVPFEVTTALSMKTLKCN 0.25875293 58.63		RAKTTNKYLDVPFEVTTALSMKTLKCNAYV 0.58242833 69.41		RAKTTNKYLDVPFEVTTALSMKTLKCNAYV 1.0172172 83.91
KYLDVPFEVTTALSMKTLKC -0.39245616 36.92		KYLDVPFEVTTALSMKTLKC 0.24428822 58.14		TTNKYLDVPFEVTTALSMKTLKCNA 0.3578078 61.93		AKTTNKYLDVPFEVTTALSMKTLKCNAYVH 0.58826211 69.61		AKTTNKYLDVPFEVTTALSMKTLKCNAYVH 0.84689941 78.23
YLDVPFEVTTALSMKTLKCN -0.22014469 42.66		YLDVPFEVTTALSMKTLKCN 0.25949603 58.65		TNKYLDVPFEVTTALSMKTLKCNAY 0.25827415 58.61		KTTNKYLDVPFEVTTALSMKTLKCNAYVHT 0.50423486 66.81		KTTNKYLDVPFEVTTALSMKTLKCNAYVHT 0.77813395 75.94
LDVPFEVTTALSMKTLKCNA -0.12604302 45.80		LDVPFEVTTALSMKTLKCNA 0.465739 65.52		NKYLDVPFEVTTALSMKTLKCNAYV 0.201381 56.71		TTNKYLDVPFEVTTALSMKTLKCNAYVHTK 0.55980934 68.66		TTNKYLDVPFEVTTALSMKTLKCNAYVHTK 0.86810972 78.94
DVPFEVTTALSMKTLKCNAY 0.13992844 54.66		DVPFEVTTALSMKTLKCNAY 0.55492373 68.50		KYLDVPFEVTTALSMKTLKCNAYVH 0.14709347 54.90		TNKYLDVPFEVTTALSMKTLKCNAYVHTKY 0.56411031 68.80		TNKYLDVPFEVTTALSMKTLKCNAYVHTKY 0.81869205 77.29
VPFEVTTALSMKTLKCNAYV 0.30540121 60.18		VPFEVTTALSMKTLKCNAYV 0.80262381 76.75		YLDVPFEVTTALSMKTLKCNAYVHT -0.0029941612 49.90		NKYLDVPFEVTTALSMKTLKCNAYVHTKYS 0.46167379 65.39		NKYLDVPFEVTTALSMKTLKCNAYVHTKYS 0.90959916 80.32
PFEVTTALSMKTLKCNAYVH 0.10019995 53.34		PFEVTTALSMKTLKCNAYVH 0.67291537 72.43		LDVPFEVTTALSMKTLKCNAYVHTK -0.02465542 49.18		KYLDVPFEVTTALSMKTLKCNAYVHTKYSD 0.46717594 65.57		KYLDVPFEVTTALSMKTLKCNAYVHTKYSD 0.8651139 78.84
FEVTTALSMKTLKCNAYVHT -0.29077362 40.31		FEVTTALSMKTLKCNAYVHT 0.27496789 59.17		DVPFEVTTALSMKTLKCNAYVHTKY 0.1893715 56.31		YLDVPFEVTTALSMKTLKCNAYVHTKYSDS 0.39206565 63.07		YLDVPFEVTTALSMKTLKCNAYVHTKYSDS 0.86009669 78.67
EVTTALSMKTLKCNAYVHTK -0.33439085 38.85		EVTTALSMKTLKCNAYVHTK 0.21583746 57.19		VPFEVTTALSMKTLKCNAYVHTKYS 0.24584295 58.19		LDVPFEVTTALSMKTLKCNAYVHTKYSDSC 0.2784432 59.28		LDVPFEVTTALSMKTLKCNAYVHTKYSDSC 0.86474112 78.82
VTTALSMKTLKCNAYVHTKY -0.34957001 38.35		VTTALSMKTLKCNAYVHTKY 0.41915093 63.97		PFEVTTALSMKTLKCNAYVHTKYSD 0.28010562 59.34		DVPFEVTTALSMKTLKCNAYVHTKYSDSCG 0.26472407 58.82		DVPFEVTTALSMKTLKCNAYVHTKYSDSCG 0.75669597 75.22
TTALSMKTLKCNAYVHTKYS -0.1279493 45.74		TTALSMKTLKCNAYVHTKYS 0.50472068 66.82		FEVTTALSMKTLKCNAYVHTKYSDS 0.30109624 60.04		VPFEVTTALSMKTLKCNAYVHTKYSDSCGT 0.20760501 56.92		VPFEVTTALSMKTLKCNAYVHTKYSDSCGT 0.67561191 72.52
TALSMKTLKCNAYVHTKYSD -0.029636661 49.01		TALSMKTLKCNAYVHTKYSD 0.70366715 73.46		EVTTALSMKTLKCNAYVHTKYSDSC 0.13000972 54.33		PFEVTTALSMKTLKCNAYVHTKYSDSCGTY 0.22420063 57.47		PFEVTTALSMKTLKCNAYVHTKYSDSCGTY 0.78572269 76.19
ALSMKTLKCNAYVHTKYSDS 0.034776449 51.16		ALSMKTLKCNAYVHTKYSDS 0.70806229 73.60		VTTALSMKTLKCNAYVHTKYSDSCG -0.057442958 48.09		FEVTTALSMKTLKCNAYVHTKYSDSCGTYF 0.24599344 58.20		FEVTTALSMKTLKCNAYVHTKYSDSCGTYF 0.78876341 76.29
LSMKTLKCNAYVHTKYSDSC 0.077116552 52.57		LSMKTLKCNAYVHTKYSDSC 0.7410428 74.70		TTALSMKTLKCNAYVHTKYSDSCGT -0.0038377744 49.87		EVTTALSMKTLKCNAYVHTKYSDSCGTYFL 0.24674829 58.22		EVTTALSMKTLKCNAYVHTKYSDSCGTYFL 0.71436703 73.81
SMKTLKCNAYVHTKYSDSCG -0.19287453 43.57		SMKTLKCNAYVHTKYSDSCG 0.36508778 62.17		TALSMKTLKCNAYVHTKYSDSCGTY 0.035235668 51.17		VTTALSMKTLKCNAYVHTKYSDSCGTYFLC 0.17105449 55.70		VTTALSMKTLKCNAYVHTKYSDSCGTYFLC 0.57629994 69.21
MKTLKCNAYVHTKYSDSCGT -0.034976963 48.83		MKTLKCNAYVHTKYSDSCGT 0.50022061 66.67		ALSMKTLKCNAYVHTKYSDSCGTYF 0.090991724 53.03		TTALSMKTLKCNAYVHTKYSDSCGTYFLCS 0.19088052 56.36		TTALSMKTLKCNAYVHTKYSDSCGTYFLCS 0.48360367 66.12
KTLKCNAYVHTKYSDSCGTY 0.099220658 53.31		KTLKCNAYVHTKYSDSCGTY 0.66643383 72.21		LSMKTLKCNAYVHTKYSDSCGTYFL 0.1326616 54.42		TALSMKTLKCNAYVHTKYSDSCGTYFLCSD 0.16400544 55.47		TALSMKTLKCNAYVHTKYSDSCGTYFLCSD 0.4010688 63.37
TLKCNAYVHTKYSDSCGTYF -0.055526468 48.15		TLKCNAYVHTKYSDSCGTYF 0.4396416 64.65		SMKTLKCNAYVHTKYSDSCGTYFLC -0.0090354614 49.70		ALSMKTLKCNAYVHTKYSDSCGTYFLCSDV 0.18018766 56.01		ALSMKTLKCNAYVHTKYSDSCGTYFLCSDV 0.38772324 62.92
LKCNAYVHTKYSDSCGTYFL -0.18373436 43.88		LKCNAYVHTKYSDSCGTYFL 0.10696026 53.57		MKTLKCNAYVHTKYSDSCGTYFLCS 0.078291957 52.61		LSMKTLKCNAYVHTKYSDSCGTYFLCSDVK 0.43141787 64.38		LSMKTLKCNAYVHTKYSDSCGTYFLCSDVK 0.502581 66.75
KCNAYVHTKYSDSCGTYFLC -0.10288779 46.57		KCNAYVHTKYSDSCGTYFLC 0.037382133 51.25		KTLKCNAYVHTKYSDSCGTYFLCSD 0.033706505 51.12		SMKTLKCNAYVHTKYSDSCGTYFLCSDVKP 0.28303555 59.43		SMKTLKCNAYVHTKYSDSCGTYFLCSDVKP 0.43391733 64.46
CNAYVHTKYSDSCGTYFLCS -0.20678064 43.11		CNAYVHTKYSDSCGTYFLCS -0.22524569 42.49		TLKCNAYVHTKYSDSCGTYFLCSDV -0.047780552 48.41		MKTLKCNAYVHTKYSDSCGTYFLCSDVKPN 0.42868636 64.29		MKTLKCNAYVHTKYSDSCGTYFLCSDVKPN 0.59266171 69.76
NAYVHTKYSDSCGTYFLCSD -0.36156903 37.95		NAYVHTKYSDSCGTYFLCSD -0.48009676 34.00		LKCNAYVHTKYSDSCGTYFLCSDVK 0.11200545 53.73		KTLKCNAYVHTKYSDSCGTYFLCSDVKPNW 0.3886133 62.95		KTLKCNAYVHTKYSDSCGTYFLCSDVKPNW 0.58962575 69.65
AYVHTKYSDSCGTYFLCSDV -0.28691471 40.44		AYVHTKYSDSCGTYFLCSDV -0.59716862 30.09		KCNAYVHTKYSDSCGTYFLCSDVKP 0.13730435 54.58		TLKCNAYVHTKYSDSCGTYFLCSDVKPNWF 0.27357105 59.12		TLKCNAYVHTKYSDSCGTYFLCSDVKPNWF 0.48031664 66.01
YVHTKYSDSCGTYFLCSDVK -0.14083653 45.31		YVHTKYSDSCGTYFLCSDVK -0.52933984 32.36		CNAYVHTKYSDSCGTYFLCSDVKPN 0.070359625 52.35		LKCNAYVHTKYSDSCGTYFLCSDVKPNWFI 0.13274489 54.42		LKCNAYVHTKYSDSCGTYFLCSDVKPNWFI 0.19345668 56.45
VHTKYSDSCGTYFLCSDVKP -0.14765017 45.08		VHTKYSDSCGTYFLCSDVKP -0.47633378 34.12		NAYVHTKYSDSCGTYFLCSDVKPNW -0.15861036 44.71		KCNAYVHTKYSDSCGTYFLCSDVKPNWFIR 0.22616316 57.54		KCNAYVHTKYSDSCGTYFLCSDVKPNWFIR 0.14208297 54.74
HTKYSDSCGTYFLCSDVKPN 0.10148339 53.38		HTKYSDSCGTYFLCSDVKPN -0.26192874 41.27		AYVHTKYSDSCGTYFLCSDVKPNWF -0.24986691 41.67		CNAYVHTKYSDSCGTYFLCSDVKPNWFIRF -0.023230886 49.23		CNAYVHTKYSDSCGTYFLCSDVKPNWFIRF 0.1236616 54.12
TKYSDSCGTYFLCSDVKPNW 0.11163958 53.72		TKYSDSCGTYFLCSDVKPNW -0.26164817 41.28		YVHTKYSDSCGTYFLCSDVKPNWFI -0.4028706 36.57		NAYVHTKYSDSCGTYFLCSDVKPNWFIRFL -0.13451335 45.52		NAYVHTKYSDSCGTYFLCSDVKPNWFIRFL 0.030638685 51.02
KYSDSCGTYFLCSDVKPNWF 0.20184085 56.73		KYSDSCGTYFLCSDVKPNWF -0.15958739 44.68		VHTKYSDSCGTYFLCSDVKPNWFIR -0.20435423 43.19		AYVHTKYSDSCGTYFLCSDVKPNWFIRFLH -0.076417017 47.45		AYVHTKYSDSCGTYFLCSDVKPNWFIRFLH 0.058978156 51.97
YSDSCGTYFLCSDVKPNWFI -0.071357351 47.62		YSDSCGTYFLCSDVKPNWFI -0.34732598 38.42		HTKYSDSCGTYFLCSDVKPNWFIRF -0.41759444 36.08		YVHTKYSDSCGTYFLCSDVKPNWFIRFLHM -0.21250608 42.92		YVHTKYSDSCGTYFLCSDVKPNWFIRFLHM -0.07774264 47.41
SDSCGTYFLCSDVKPNWFIR -0.056719555 48.11		SDSCGTYFLCSDVKPNWFIR -0.32858947 39.05		TKYSDSCGTYFLCSDVKPNWFIRFL -0.31756659 39.41		VHTKYSDSCGTYFLCSDVKPNWFIRFLHMI -0.12264877 45.91		VHTKYSDSCGTYFLCSDVKPNWFIRFLHMI -0.11649546 46.12
DSCGTYFLCSDVKPNWFIRF -0.33160716 38.95		DSCGTYFLCSDVKPNWFIRF -0.66687538 27.77		KYSDSCGTYFLCSDVKPNWFIRFLH -0.32985433 39.00		HTKYSDSCGTYFLCSDVKPNWFIRFLHMIG -0.026077713 49.13		HTKYSDSCGTYFLCSDVKPNWFIRFLHMIG -0.09555646 46.81
SCGTYFLCSDVKPNWFIRFL -0.22703222 42.43		SCGTYFLCSDVKPNWFIRFL -0.3740927 37.53		YSDSCGTYFLCSDVKPNWFIRFLHM -0.49655972 33.45		TKYSDSCGTYFLCSDVKPNWFIRFLHMIGL 0.0086582974 50.29		TKYSDSCGTYFLCSDVKPNWFIRFLHMIGL -0.016366796 49.45
CGTYFLCSDVKPNWFIRFLH -0.10327603 46.56		CGTYFLCSDVKPNWFIRFLH -0.12138082 45.95		SDSCGTYFLCSDVKPNWFIRFLHMI -0.3371642 38.76		KYSDSCGTYFLCSDVKPNWFIRFLHMIGLY -0.044035988 48.53		KYSDSCGTYFLCSDVKPNWFIRFLHMIGLY -0.15649413 44.78
GTYFLCSDVKPNWFIRFLHM -0.031859453 48.94		GTYFLCSDVKPNWFIRFLHM -0.06214193 47.93		DSCGTYFLCSDVKPNWFIRFLHMIG -0.30697152 39.77		YSDSCGTYFLCSDVKPNWFIRFLHMIGLYN -0.16542523 44.49		YSDSCGTYFLCSDVKPNWFIRFLHMIGLYN -0.17246607 44.25
TYFLCSDVKPNWFIRFLHMI -0.14615851 45.13		TYFLCSDVKPNWFIRFLHMI -0.050832761 48.31		SCGTYFLCSDVKPNWFIRFLHMIGL -0.15812497 44.73		SDSCGTYFLCSDVKPNWFIRFLHMIGLYNT -0.10423055 46.53		SDSCGTYFLCSDVKPNWFIRFLHMIGLYNT -0.17494229 44.17
YFLCSDVKPNWFIRFLHMIG -0.011175135 49.63		YFLCSDVKPNWFIRFLHMIG -0.074011738 47.53		CGTYFLCSDVKPNWFIRFLHMIGLY -0.089523497 47.02		DSCGTYFLCSDVKPNWFIRFLHMIGLYNTK -0.092887673 46.90		DSCGTYFLCSDVKPNWFIRFLHMIGLYNTK -0.16422459 44.53
FLCSDVKPNWFIRFLHMIGL 0.1644222 55.48		FLCSDVKPNWFIRFLHMIGL 0.0074800223 50.25		GTYFLCSDVKPNWFIRFLHMIGLYN 0.12683721 54.23		SCGTYFLCSDVKPNWFIRFLHMIGLYNTKR 0.13979485 54.66		SCGTYFLCSDVKPNWFIRFLHMIGLYNTKR -0.17097472 44.30
LCSDVKPNWFIRFLHMIGLY 0.11489639 53.83		LCSDVKPNWFIRFLHMIGLY -0.0018254321 49.94		TYFLCSDVKPNWFIRFLHMIGLYNT 0.16312296 55.44		CGTYFLCSDVKPNWFIRFLHMIGLYNTKRI 0.13649044 54.55		CGTYFLCSDVKPNWFIRFLHMIGLYNTKRI -0.228245 42.39
CSDVKPNWFIRFLHMIGLYN 0.15170288 55.06		CSDVKPNWFIRFLHMIGLYN -0.012622825 49.58		YFLCSDVKPNWFIRFLHMIGLYNTK 0.09183953 53.06		GTYFLCSDVKPNWFIRFLHMIGLYNTKRIV 0.31339059 60.45		GTYFLCSDVKPNWFIRFLHMIGLYNTKRIV -0.051797945 48.27
SDVKPNWFIRFLHMIGLYNT 0.015844605 50.53		SDVKPNWFIRFLHMIGLYNT -0.060164749 47.99		FLCSDVKPNWFIRFLHMIGLYNTKR 0.24635466 58.21		TYFLCSDVKPNWFIRFLHMIGLYNTKRIVI 0.34948113 61.65		TYFLCSDVKPNWFIRFLHMIGLYNTKRIVI -0.066730532 47.78
DVKPNWFIRFLHMIGLYNTK -0.2635803 41.21		DVKPNWFIRFLHMIGLYNTK -0.52981089 32.34		LCSDVKPNWFIRFLHMIGLYNTKRI 0.13506812 54.50		YFLCSDVKPNWFIRFLHMIGLYNTKRIVIF 0.26161188 58.72		YFLCSDVKPNWFIRFLHMIGLYNTKRIVIF -0.20359226 43.21
VKPNWFIRFLHMIGLYNTKR -0.062459937 47.92		VKPNWFIRFLHMIGLYNTKR -0.21834846 42.72		CSDVKPNWFIRFLHMIGLYNTKRIV 0.093613771 53.12		FLCSDVKPNWFIRFLHMIGLYNTKRIVIFV 0.28118962 59.37		FLCSDVKPNWFIRFLHMIGLYNTKRIVIFV -0.13836449 45.39
KPNWFIRFLHMIGLYNTKRI -0.41970167 36.01		KPNWFIRFLHMIGLYNTKRI -0.57113256 30.96		SDVKPNWFIRFLHMIGLYNTKRIVI 0.094600659 53.15		LCSDVKPNWFIRFLHMIGLYNTKRIVIFVC 0.36082947 62.03		LCSDVKPNWFIRFLHMIGLYNTKRIVIFVC -0.13142596 45.62
PNWFIRFLHMIGLYNTKRIV -0.61013045 29.66		PNWFIRFLHMIGLYNTKRIV -0.85864896 21.38		DVKPNWFIRFLHMIGLYNTKRIVIF -0.074300854 47.52		CSDVKPNWFIRFLHMIGLYNTKRIVIFVCC 0.37950281 62.65		CSDVKPNWFIRFLHMIGLYNTKRIVIFVCC -0.14080467 45.31
NWFIRFLHMIGLYNTKRIVI -0.62184239 29.27		NWFIRFLHMIGLYNTKRIVI -0.86678472 21.11		VKPNWFIRFLHMIGLYNTKRIVIFV -0.044285417 48.52		SDVKPNWFIRFLHMIGLYNTKRIVIFVCCT 0.41027319 63.68		SDVKPNWFIRFLHMIGLYNTKRIVIFVCCT -0.026279855 49.12
WFIRFLHMIGLYNTKRIVIF -0.42753605 35.75		WFIRFLHMIGLYNTKRIVIF -0.70942012 26.35		KPNWFIRFLHMIGLYNTKRIVIFVC -0.32796559 39.07		DVKPNWFIRFLHMIGLYNTKRIVIFVCCTT 0.34365035 61.46		DVKPNWFIRFLHMIGLYNTKRIVIFVCCTT -0.024091554 49.20
FIRFLHMIGLYNTKRIVIFV -0.46290227 34.57		FIRFLHMIGLYNTKRIVIFV -0.92834531 19.06		PNWFIRFLHMIGLYNTKRIVIFVCC -0.26828361 41.06		VKPNWFIRFLHMIGLYNTKRIVIFVCCTTT 0.41580586 63.86		VKPNWFIRFLHMIGLYNTKRIVIFVCCTTT 0.060525179 52.02
IRFLHMIGLYNTKRIVIFVC -0.15879427 44.71		IRFLHMIGLYNTKRIVIFVC -0.86725262 21.09		NWFIRFLHMIGLYNTKRIVIFVCCT -0.22676287 42.44		KPNWFIRFLHMIGLYNTKRIVIFVCCTTTA 0.1679101 55.60		KPNWFIRFLHMIGLYNTKRIVIFVCCTTTA 0.0079020421 50.26
RFLHMIGLYNTKRIVIFVCC -0.25341838 41.55		RFLHMIGLYNTKRIVIFVCC -0.86829961 21.06		WFIRFLHMIGLYNTKRIVIFVCCTT -0.071996529 47.60		PNWFIRFLHMIGLYNTKRIVIFVCCTTTAI 0.2773133 59.24		PNWFIRFLHMIGLYNTKRIVIFVCCTTTAI 0.15214414 55.07
FLHMIGLYNTKRIVIFVCCT -0.095085518 46.83		FLHMIGLYNTKRIVIFVCCT -0.61359958 29.55		FIRFLHMIGLYNTKRIVIFVCCTTT 0.035486594 51.18		NWFIRFLHMIGLYNTKRIVIFVCCTTTAIV 0.12935641 54.31		NWFIRFLHMIGLYNTKRIVIFVCCTTTAIV 0.085373655 52.85
LHMIGLYNTKRIVIFVCCTT 0.2659533 58.87		LHMIGLYNTKRIVIFVCCTT -0.12659772 45.78		IRFLHMIGLYNTKRIVIFVCCTTTA 0.095016727 53.17		WFIRFLHMIGLYNTKRIVIFVCCTTTAIVL 0.35339241 61.78		WFIRFLHMIGLYNTKRIVIFVCCTTTAIVL 0.012496136 50.42
HMIGLYNTKRIVIFVCCTTT 0.34083443 61.36		HMIGLYNTKRIVIFVCCTTT 0.03727274 51.24		RFLHMIGLYNTKRIVIFVCCTTTAI 0.058824501 51.96		FIRFLHMIGLYNTKRIVIFVCCTTTAIVLT 0.3422612 61.41		FIRFLHMIGLYNTKRIVIFVCCTTTAIVLT 0.069339168 52.31
MIGLYNTKRIVIFVCCTTTA 0.41410654 63.80		MIGLYNTKRIVIFVCCTTTA 0.2385797 57.95		FLHMIGLYNTKRIVIFVCCTTTAIV 0.028287805 50.94		IRFLHMIGLYNTKRIVIFVCCTTTAIVLTI 0.45060992 65.02		IRFLHMIGLYNTKRIVIFVCCTTTAIVLTI 0.16102641 55.37
IGLYNTKRIVIFVCCTTTAI 0.3220285 60.73		IGLYNTKRIVIFVCCTTTAI 0.068845385 52.29		LHMIGLYNTKRIVIFVCCTTTAIVL 0.23754628 57.92		RFLHMIGLYNTKRIVIFVCCTTTAIVLTIW 0.16794595 55.60		RFLHMIGLYNTKRIVIFVCCTTTAIVLTIW 0.19929015 56.64
GLYNTKRIVIFVCCTTTAIV 0.22044716 57.35		GLYNTKRIVIFVCCTTTAIV -0.16317043 44.56		HMIGLYNTKRIVIFVCCTTTAIVLT 0.10878266 53.63		FLHMIGLYNTKRIVIFVCCTTTAIVLTIWI 0.21117774 57.04		FLHMIGLYNTKRIVIFVCCTTTAIVLTIWI 0.29199723 59.73
LYNTKRIVIFVCCTTTAIVL 0.061385009 52.05		LYNTKRIVIFVCCTTTAIVL -0.24874026 41.71		MIGLYNTKRIVIFVCCTTTAIVLTI 0.26624984 58.87		LHMIGLYNTKRIVIFVCCTTTAIVLTIWIW 0.072258436 52.41		LHMIGLYNTKRIVIFVCCTTTAIVLTIWIW 0.31320165 60.44
YNTKRIVIFVCCTTTAIVLT 0.07872258 52.62		YNTKRIVIFVCCTTTAIVLT -0.20056764 43.31		IGLYNTKRIVIFVCCTTTAIVLTIW 0.062265062 52.08		HMIGLYNTKRIVIFVCCTTTAIVLTIWIWK 0.14355692 54.79		HMIGLYNTKRIVIFVCCTTTAIVLTIWIWK 0.51345394 67.12
NTKRIVIFVCCTTTAIVLTI -0.038352359 48.72		NTKRIVIFVCCTTTAIVLTI -0.13232699 45.59		GLYNTKRIVIFVCCTTTAIVLTIWI -0.038772097 48.71		MIGLYNTKRIVIFVCCTTTAIVLTIWIWKR 0.32504314 60.83		MIGLYNTKRIVIFVCCTTTAIVLTIWIWKR 0.50928349 66.98
TKRIVIFVCCTTTAIVLTIW 0.016169077 50.54		TKRIVIFVCCTTTAIVLTIW -0.041904462 48.60		LYNTKRIVIFVCCTTTAIVLTIWIW -0.20860571 43.05		IGLYNTKRIVIFVCCTTTAIVLTIWIWKRF 0.19751553 56.58		IGLYNTKRIVIFVCCTTTAIVLTIWIWKRF 0.50385648 66.80
KRIVIFVCCTTTAIVLTIWI 0.18072365 56.02		KRIVIFVCCTTTAIVLTIWI 0.31619062 60.54		YNTKRIVIFVCCTTTAIVLTIWIWK 0.090502944 53.02		GLYNTKRIVIFVCCTTTAIVLTIWIWKRFI 0.09903786 53.30		GLYNTKRIVIFVCCTTTAIVLTIWIWKRFI 0.42297518 64.10
RIVIFVCCTTTAIVLTIWIW -0.14292865 45.24		RIVIFVCCTTTAIVLTIWIW -0.0085069613 49.72		NTKRIVIFVCCTTTAIVLTIWIWKR 0.20094955 56.70		LYNTKRIVIFVCCTTTAIVLTIWIWKRFIK 0.011048489 50.37		LYNTKRIVIFVCCTTTAIVLTIWIWKRFIK 0.41513651 63.84
IVIFVCCTTTAIVLTIWIWK 0.1270711 54.24		IVIFVCCTTTAIVLTIWIWK 0.0075117469 50.25		TKRIVIFVCCTTTAIVLTIWIWKRF 0.15123651 55.04		YNTKRIVIFVCCTTTAIVLTIWIWKRFIKA 0.051491026 51.72		YNTKRIVIFVCCTTTAIVLTIWIWKRFIKA 0.49708963 66.57
VIFVCCTTTAIVLTIWIWKR 0.44951825 64.98		VIFVCCTTTAIVLTIWIWKR 0.29485986 59.83		KRIVIFVCCTTTAIVLTIWIWKRFI 0.048688052 51.62		NTKRIVIFVCCTTTAIVLTIWIWKRFIKAK 0.082954954 52.77		NTKRIVIFVCCTTTAIVLTIWIWKRFIKAK 0.406906 63.56
IFVCCTTTAIVLTIWIWKRF 0.59387282 69.80		IFVCCTTTAIVLTIWIWKRF 0.39415867 63.14		RIVIFVCCTTTAIVLTIWIWKRFIK -0.13125982 45.62		TKRIVIFVCCTTTAIVLTIWIWKRFIKAKK 0.19931172 56.64		TKRIVIFVCCTTTAIVLTIWIWKRFIKAKK 0.37613633 62.54
FVCCTTTAIVLTIWIWKRFI 0.37527194 62.51		FVCCTTTAIVLTIWIWKRFI 0.29792889 59.93		IVIFVCCTTTAIVLTIWIWKRFIKA -0.03162326 48.95		KRIVIFVCCTTTAIVLTIWIWKRFIKAKKE 0.2857639 59.53		KRIVIFVCCTTTAIVLTIWIWKRFIKAKKE 0.40140641 63.38
VCCTTTAIVLTIWIWKRFIK 0.37861479 62.62		VCCTTTAIVLTIWIWKRFIK 0.36379515 62.13		VIFVCCTTTAIVLTIWIWKRFIKAK -0.020851188 49.30		RIVIFVCCTTTAIVLTIWIWKRFIKAKKEP 0.1956865 56.52		RIVIFVCCTTTAIVLTIWIWKRFIKAKKEP 0.57515436 69.17
CCTTTAIVLTIWIWKRFIKA 0.25741092 58.58		CCTTTAIVLTIWIWKRFIKA 0.29795624 59.93		IFVCCTTTAIVLTIWIWKRFIKAKK 0.19397993 56.47		IVIFVCCTTTAIVLTIWIWKRFIKAKKEPA 0.32879389 60.96		IVIFVCCTTTAIVLTIWIWKRFIKAKKEPA 0.74909273 74.97
CTTTAIVLTIWIWKRFIKAK 0.056760927 51.89		CTTTAIVLTIWIWKRFIKAK 0.024848599 50.83		FVCCTTTAIVLTIWIWKRFIKAKKE 0.12705905 54.24		VIFVCCTTTAIVLTIWIWKRFIKAKKEPAP 0.40194264 63.40		VIFVCCTTTAIVLTIWIWKRFIKAKKEPAP 0.75931784 75.31
TTTAIVLTIWIWKRFIKAKK -0.08437787 47.19		TTTAIVLTIWIWKRFIKAKK -0.069313617 47.69		VCCTTTAIVLTIWIWKRFIKAKKEP 0.20548259 56.85		IFVCCTTTAIVLTIWIWKRFIKAKKEPAPP 0.48326355 66.11		IFVCCTTTAIVLTIWIWKRFIKAKKEPAPP 0.79843883 76.61
TTAIVLTIWIWKRFIKAKKE -0.15670896 44.78		TTAIVLTIWIWKRFIKAKKE -0.23696114 42.10		CCTTTAIVLTIWIWKRFIKAKKEPA 0.39930223 63.31		FVCCTTTAIVLTIWIWKRFIKAKKEPAPPS 0.48264858 66.09		FVCCTTTAIVLTIWIWKRFIKAKKEPAPPS 0.90192039 80.06
TAIVLTIWIWKRFIKAKKEP 0.11748591 53.92		TAIVLTIWIWKRFIKAKKEP -0.033993175 48.87		CTTTAIVLTIWIWKRFIKAKKEPAP 0.62189868 70.73		VCCTTTAIVLTIWIWKRFIKAKKEPAPPSF 0.50932544 66.98		VCCTTTAIVLTIWIWKRFIKAKKEPAPPSF 0.95453521 81.82
AIVLTIWIWKRFIKAKKEPA 0.30085017 60.03		AIVLTIWIWKRFIKAKKEPA 0.17586526 55.86		TTTAIVLTIWIWKRFIKAKKEPAPP 0.47325865 65.78		CCTTTAIVLTIWIWKRFIKAKKEPAPPSFD 0.60156895 70.05		CCTTTAIVLTIWIWKRFIKAKKEPAPPSFD 1.06253 85.42
IVLTIWIWKRFIKAKKEPAP 0.41142963 63.71		IVLTIWIWKRFIKAKKEPAP 0.074784858 52.49		TTAIVLTIWIWKRFIKAKKEPAPPS 0.45303056 65.10		CTTTAIVLTIWIWKRFIKAKKEPAPPSFDK 0.62494314 70.83		CTTTAIVLTIWIWKRFIKAKKEPAPPSFDK 1.1466941 88.22
VLTIWIWKRFIKAKKEPAPP 0.47091286 65.70		VLTIWIWKRFIKAKKEPAPP -0.0187572 49.37		TAIVLTIWIWKRFIKAKKEPAPPSF 0.3835617 62.79		TTTAIVLTIWIWKRFIKAKKEPAPPSFDKY 0.6043043 70.14		TTTAIVLTIWIWKRFIKAKKEPAPPSFDKY 1.1342852 87.81
LTIWIWKRFIKAKKEPAPPS 0.8043192 76.81		LTIWIWKRFIKAKKEPAPPS 0.33051158 61.02		AIVLTIWIWKRFIKAKKEPAPPSFD 0.57814351 69.27		TTAIVLTIWIWKRFIKAKKEPAPPSFDKYL 0.49728407 66.58		TTAIVLTIWIWKRFIKAKKEPAPPSFDKYL 1.0247718 84.16
TIWIWKRFIKAKKEPAPPSF 0.75547834 75.18		TIWIWKRFIKAKKEPAPPSF 0.20927477 56.98		IVLTIWIWKRFIKAKKEPAPPSFDK 0.64721803 71.57		TAIVLTIWIWKRFIKAKKEPAPPSFDKYLS 0.24204965 58.07		TAIVLTIWIWKRFIKAKKEPAPPSFDKYLS 0.97150908 82.38
IWIWKRFIKAKKEPAPPSFD 0.87556249 79.19		IWIWKRFIKAKKEPAPPSFD 0.27599386 59.20		VLTIWIWKRFIKAKKEPAPPSFDKY 0.72460779 74.15		AIVLTIWIWKRFIKAKKEPAPPSFDKYLSN 0.25757931 58.59		AIVLTIWIWKRFIKAKKEPAPPSFDKYLSN 0.87654877 79.22
WIWKRFIKAKKEPAPPSFDK 0.97531078 82.51		WIWKRFIKAKKEPAPPSFDK 0.45351253 65.12		LTIWIWKRFIKAKKEPAPPSFDKYL 0.59413028 69.80		IVLTIWIWKRFIKAKKEPAPPSFDKYLSNY 0.38112593 62.70		IVLTIWIWKRFIKAKKEPAPPSFDKYLSNY 1.0011239 83.37
IWKRFIKAKKEPAPPSFDKY 0.85619237 78.54		IWKRFIKAKKEPAPPSFDKY 0.44277112 64.76		TIWIWKRFIKAKKEPAPPSFDKYLS 0.3745674 62.49		VLTIWIWKRFIKAKKEPAPPSFDKYLSNYD 0.27827235 59.28		VLTIWIWKRFIKAKKEPAPPSFDKYLSNYD 0.81242355 77.08
WKRFIKAKKEPAPPSFDKYL 0.72044852 74.01		WKRFIKAKKEPAPPSFDKYL 0.52162999 67.39		IWIWKRFIKAKKEPAPPSFDKYLSN 0.42350737 64.12		LTIWIWKRFIKAKKEPAPPSFDKYLSNYDY 0.40583071 63.53		LTIWIWKRFIKAKKEPAPPSFDKYLSNYDY 0.7606914 75.36
KRFIKAKKEPAPPSFDKYLS 0.41223828 63.74		KRFIKAKKEPAPPSFDKYLS 0.39486727 63.16		WIWKRFIKAKKEPAPPSFDKYLSNY 0.69201278 73.07		TIWIWKRFIKAKKEPAPPSFDKYLSNYDYD 0.38875176 62.96		TIWIWKRFIKAKKEPAPPSFDKYLSNYDYD 0.66364853 72.12
RFIKAKKEPAPPSFDKYLSN 0.38645502 62.88		RFIKAKKEPAPPSFDKYLSN 0.2594024 58.65		IWKRFIKAKKEPAPPSFDKYLSNYD 0.81111595 77.04		IWIWKRFIKAKKEPAPPSFDKYLSNYDYDT 0.58228395 69.41		IWIWKRFIKAKKEPAPPSFDKYLSNYDYDT 0.65273787 71.76
FIKAKKEPAPPSFDKYLSNY 0.45082775 65.03		FIKAKKEPAPPSFDKYLSNY 0.30350703 60.12		WKRFIKAKKEPAPPSFDKYLSNYDY 1.0702731 85.68		WIWKRFIKAKKEPAPPSFDKYLSNYDYDTT 0.81704501 77.23		WIWKRFIKAKKEPAPPSFDKYLSNYDYDTT 0.75745154 75.25
IKAKKEPAPPSFDKYLSNYD 0.59029311 69.68		IKAKKEPAPPSFDKYLSNYD 0.41450809 63.82		KRFIKAKKEPAPPSFDKYLSNYDYD 0.89239703 79.75		IWKRFIKAKKEPAPPSFDKYLSNYDYDTTL 1.0173301 83.91		IWKRFIKAKKEPAPPSFDKYLSNYDYDTTL 0.81300026 77.10
KAKKEPAPPSFDKYLSNYDY 0.90512625 80.17		KAKKEPAPPSFDKYLSNYDY 0.71160529 73.72		RFIKAKKEPAPPSFDKYLSNYDYDT 0.91760677 80.59		WKRFIKAKKEPAPPSFDKYLSNYDYDTTLD 1.1698327 88.99		WKRFIKAKKEPAPPSFDKYLSNYDYDTTLD 0.84245411 78.08
AKKEPAPPSFDKYLSNYDYD 0.78595507 76.20		AKKEPAPPSFDKYLSNYDYD 0.47042969 65.68		FIKAKKEPAPPSFDKYLSNYDYDTT 1.0746511 85.82		KRFIKAKKEPAPPSFDKYLSNYDYDTTLDA 0.81774104 77.26		KRFIKAKKEPAPPSFDKYLSNYDYDTTLDA 0.60304645 70.10
KKEPAPPSFDKYLSNYDYDT 0.84063355 78.02		KKEPAPPSFDKYLSNYDYDT 0.71825764 73.94		IKAKKEPAPPSFDKYLSNYDYDTTL 1.195178 89.84		RFIKAKKEPAPPSFDKYLSNYDYDTTLDAD 0.59348223 69.78		RFIKAKKEPAPPSFDKYLSNYDYDTTLDAD 0.33543934 61.18
KEPAPPSFDKYLSNYDYDTT 0.5723156 69.08		KEPAPPSFDKYLSNYDYDTT 0.27347405 59.12		KAKKEPAPPSFDKYLSNYDYDTTLD 1.3316934 94.39		FIKAKKEPAPPSFDKYLSNYDYDTTLDADN 0.68885948 72.96		FIKAKKEPAPPSFDKYLSNYDYDTTLDADN 0.27052713 59.02
EPAPPSFDKYLSNYDYDTTL 0.37722439 62.57		EPAPPSFDKYLSNYDYDTTL 0.015022772 50.50		AKKEPAPPSFDKYLSNYDYDTTLDA 1.0343586 84.48		IKAKKEPAPPSFDKYLSNYDYDTTLDADNE 0.81761919 77.25		IKAKKEPAPPSFDKYLSNYDYDTTLDADNE 0.40522412 63.51
PAPPSFDKYLSNYDYDTTLD 0.18291293 56.10		PAPPSFDKYLSNYDYDTTLD -0.086171042 47.13		KKEPAPPSFDKYLSNYDYDTTLDAD 0.86208114 78.74		KAKKEPAPPSFDKYLSNYDYDTTLDADNET 0.79676223 76.56		KAKKEPAPPSFDKYLSNYDYDTTLDADNET 0.49889662 66.63
APPSFDKYLSNYDYDTTLDA 0.20447681 56.82		APPSFDKYLSNYDYDTTLDA -0.15221671 44.93		KEPAPPSFDKYLSNYDYDTTLDADN 0.68124905 72.71		AKKEPAPPSFDKYLSNYDYDTTLDADNETE 0.82767342 77.59		AKKEPAPPSFDKYLSNYDYDTTLDADNETE 0.50312889 66.77
PPSFDKYLSNYDYDTTLDAD 0.049978946 51.67		PPSFDKYLSNYDYDTTLDAD -0.36490947 37.84		EPAPPSFDKYLSNYDYDTTLDADNE 0.73670053 74.56		KKEPAPPSFDKYLSNYDYDTTLDADNETEQ 0.73793153 74.60		KKEPAPPSFDKYLSNYDYDTTLDADNETEQ 0.71230024 73.74
PSFDKYLSNYDYDTTLDADN -0.27528422 40.82		PSFDKYLSNYDYDTTLDADN -0.64962028 28.35		PAPPSFDKYLSNYDYDTTLDADNET 0.61623948 70.54		KEPAPPSFDKYLSNYDYDTTLDADNETEQR 0.84225059 78.08		KEPAPPSFDKYLSNYDYDTTLDADNETEQR 0.68320104 72.77
SFDKYLSNYDYDTTLDADNE -0.38499233 37.17		SFDKYLSNYDYDTTLDADNE -0.62348464 29.22		APPSFDKYLSNYDYDTTLDADNETE 0.6135635 70.45		EPAPPSFDKYLSNYDYDTTLDADNETEQRL 0.7200524 74.00		EPAPPSFDKYLSNYDYDTTLDADNETEQRL 0.78558091 76.19
FDKYLSNYDYDTTLDADNET -0.22865366 42.38		FDKYLSNYDYDTTLDADNET -0.48099705 33.97		PPSFDKYLSNYDYDTTLDADNETEQ 0.44104616 64.70		PAPPSFDKYLSNYDYDTTLDADNETEQRLD 0.67999947 72.67		PAPPSFDKYLSNYDYDTTLDADNETEQRLD 0.57484378 69.16
DKYLSNYDYDTTLDADNETE -0.55485948 31.50		DKYLSNYDYDTTLDADNETE -0.68569761 27.14		PSFDKYLSNYDYDTTLDADNETEQR 0.51709266 67.24		APPSFDKYLSNYDYDTTLDADNETEQRLDS 0.56889274 68.96		APPSFDKYLSNYDYDTTLDADNETEQRLDS 0.59712885 69.90
KYLSNYDYDTTLDADNETEQ -0.58883008 30.37		KYLSNYDYDTTLDADNETEQ -0.68355003 27.21		SFDKYLSNYDYDTTLDADNETEQRL 0.32642333 60.88		PPSFDKYLSNYDYDTTLDADNETEQRLDSS 0.47484951 65.83		PPSFDKYLSNYDYDTTLDADNETEQRLDSS 0.59018004 69.67
YLSNYDYDTTLDADNETEQR -0.47142697 34.29		YLSNYDYDTTLDADNETEQR -0.61608515 29.46		FDKYLSNYDYDTTLDADNETEQRLD 0.40666258 63.56		PSFDKYLSNYDYDTTLDADNETEQRLDSSA 0.453021 65.10		PSFDKYLSNYDYDTTLDADNETEQRLDSSA 0.68654393 72.88
LSNYDYDTTLDADNETEQRL -0.3355457 38.82		LSNYDYDTTLDADNETEQRL -0.48228915 33.92		DKYLSNYDYDTTLDADNETEQRLDS 0.29693473 59.90		SFDKYLSNYDYDTTLDADNETEQRLDSSAY 0.46257366 65.42		SFDKYLSNYDYDTTLDADNETEQRLDSSAY 0.68905413 72.97
SNYDYDTTLDADNETEQRLD -0.3301921 38.99		SNYDYDTTLDADNETEQRLD -0.52064061 32.65		KYLSNYDYDTTLDADNETEQRLDSS 0.11639069 53.88		FDKYLSNYDYDTTLDADNETEQRLDSSAYS 0.5407536 68.03		FDKYLSNYDYDTTLDADNETEQRLDSSAYS 0.73576936 74.53
NYDYDTTLDADNETEQRLDS -0.39476241 36.84		NYDYDTTLDADNETEQRLDS -0.52326013 32.56		YLSNYDYDTTLDADNETEQRLDSSA -0.043046589 48.57		DKYLSNYDYDTTLDADNETEQRLDSSAYSW 0.45420028 65.14		DKYLSNYDYDTTLDADNETEQRLDSSAYSW 0.77155756 75.72
YDYDTTLDADNETEQRLDSS -0.23743266 42.09		YDYDTTLDADNETEQRLDSS -0.29861129 40.05		LSNYDYDTTLDADNETEQRLDSSAY -0.0023210811 49.92		KYLSNYDYDTTLDADNETEQRLDSSAYSWG 0.39956164 63.32		KYLSNYDYDTTLDADNETEQRLDSSAYSWG 0.75396828 75.13
DYDTTLDADNETEQRLDSSA -0.11356617 46.21		DYDTTLDADNETEQRLDSSA -0.065994837 47.80		SNYDYDTTLDADNETEQRLDSSAYS 0.062187116 52.07		YLSNYDYDTTLDADNETEQRLDSSAYSWGE 0.43210476 64.40		YLSNYDYDTTLDADNETEQRLDSSAYSWGE 0.58815232 69.61
YDTTLDADNETEQRLDSSAY -0.19471112 43.51		YDTTLDADNETEQRLDSSAY -0.17473307 44.18		NYDYDTTLDADNETEQRLDSSAYSW -0.040193781 48.66		LSNYDYDTTLDADNETEQRLDSSAYSWGEA 0.52272832 67.42		LSNYDYDTTLDADNETEQRLDSSAYSWGEA 0.63566598 71.19
DTTLDADNETEQRLDSSAYS 0.23727792 57.91		DTTLDADNETEQRLDSSAYS 0.30923365 60.31		YDYDTTLDADNETEQRLDSSAYSWG -0.056867397 48.10		SNYDYDTTLDADNETEQRLDSSAYSWGEAV 0.57156057 69.05		SNYDYDTTLDADNETEQRLDSSAYSWGEAV 0.55255377 68.42
TTLDADNETEQRLDSSAYSW 0.13153038 54.38		TTLDADNETEQRLDSSAYSW 0.17204481 55.73		DYDTTLDADNETEQRLDSSAYSWGE 0.16026329 55.34		NYDYDTTLDADNETEQRLDSSAYSWGEAVQ 0.69569765 73.19		NYDYDTTLDADNETEQRLDSSAYSWGEAVQ 0.65068211 71.69
TLDADNETEQRLDSSAYSWG 0.078506129 52.62		TLDADNETEQRLDSSAYSWG 0.10493398 53.50		YDTTLDADNETEQRLDSSAYSWGEA 0.19085091 56.36		YDYDTTLDADNETEQRLDSSAYSWGEAVQR 0.71882771 73.96		YDYDTTLDADNETEQRLDSSAYSWGEAVQR 0.48098036 66.03
LDADNETEQRLDSSAYSWGE 0.28539879 59.51		LDADNETEQRLDSSAYSWGE 0.49160137 66.39		DTTLDADNETEQRLDSSAYSWGEAV 0.38703181 62.90		DYDTTLDADNETEQRLDSSAYSWGEAVQRP 0.79744203 76.58		DYDTTLDADNETEQRLDSSAYSWGEAVQRP 0.55125306 68.38
DADNETEQRLDSSAYSWGEA 0.31563406 60.52		DADNETEQRLDSSAYSWGEA 0.49715991 66.57		TTLDADNETEQRLDSSAYSWGEAVQ 0.49143952 66.38		YDTTLDADNETEQRLDSSAYSWGEAVQRPS 0.92636468 80.88		YDTTLDADNETEQRLDSSAYSWGEAVQRPS 0.70255948 73.42
ADNETEQRLDSSAYSWGEAV 0.21890635 57.30		ADNETEQRLDSSAYSWGEAV 0.26307398 58.77		TLDADNETEQRLDSSAYSWGEAVQR 0.59076871 69.69		DTTLDADNETEQRLDSSAYSWGEAVQRPSD 1.1633129 88.78		DTTLDADNETEQRLDSSAYSWGEAVQRPSD 0.94024903 81.34
DNETEQRLDSSAYSWGEAVQ 0.092278403 53.08		DNETEQRLDSSAYSWGEAVQ 0.38332352 62.78		LDADNETEQRLDSSAYSWGEAVQRP 0.64604908 71.53		TTLDADNETEQRLDSSAYSWGEAVQRPSDV 1.1571054 88.57		TTLDADNETEQRLDSSAYSWGEAVQRPSDV 1.0077477 83.59
NETEQRLDSSAYSWGEAVQR 0.31040174 60.35		NETEQRLDSSAYSWGEAVQR 0.61907893 70.64		DADNETEQRLDSSAYSWGEAVQRPS 0.79682228 76.56		TLDADNETEQRLDSSAYSWGEAVQRPSDVT 1.1150235 87.17		TLDADNETEQRLDSSAYSWGEAVQRPSDVT 0.91914843 80.64
ETEQRLDSSAYSWGEAVQRP 0.46880315 65.63		ETEQRLDSSAYSWGEAVQRP 0.64809781 71.60		ADNETEQRLDSSAYSWGEAVQRPSD 0.87384185 79.13		LDADNETEQRLDSSAYSWGEAVQRPSDVTP 1.1338431 87.79		LDADNETEQRLDSSAYSWGEAVQRPSDVTP 0.84182071 78.06
TEQRLDSSAYSWGEAVQRPS 0.56258684 68.75		TEQRLDSSAYSWGEAVQRPS 0.68759012 72.92		DNETEQRLDSSAYSWGEAVQRPSDV 0.87914508 79.30		DADNETEQRLDSSAYSWGEAVQRPSDVTPV 1.067892 85.60		DADNETEQRLDSSAYSWGEAVQRPSDVTPV 0.79605214 76.54
EQRLDSSAYSWGEAVQRPSD 0.61730592 70.58		EQRLDSSAYSWGEAVQRPSD 0.65870753 71.96		NETEQRLDSSAYSWGEAVQRPSDVT 0.90783709 80.26		ADNETEQRLDSSAYSWGEAVQRPSDVTPVK 1.1591581 88.64		ADNETEQRLDSSAYSWGEAVQRPSDVTPVK 0.82070912 77.36
QRLDSSAYSWGEAVQRPSDV 0.33779711 61.26		QRLDSSAYSWGEAVQRPSDV 0.32916382 60.97		ETEQRLDSSAYSWGEAVQRPSDVTP 1.0692215 85.64		DNETEQRLDSSAYSWGEAVQRPSDVTPVKL 1.016574 83.89		DNETEQRLDSSAYSWGEAVQRPSDVTPVKL 1.1098669 87.00
RLDSSAYSWGEAVQRPSDVT 0.14413882 54.80		RLDSSAYSWGEAVQRPSDVT 0.13076904 54.36		TEQRLDSSAYSWGEAVQRPSDVTPV 0.98875609 82.96		NETEQRLDSSAYSWGEAVQRPSDVTPVKLS 1.0790753 85.97		NETEQRLDSSAYSWGEAVQRPSDVTPVKLS 1.1993097 89.98
LDSSAYSWGEAVQRPSDVTP 0.24197593 58.07		LDSSAYSWGEAVQRPSDVTP 0.21242004 57.08		EQRLDSSAYSWGEAVQRPSDVTPVK 0.95173435 81.72		ETEQRLDSSAYSWGEAVQRPSDVTPVKLSK 1.1747669 89.16		ETEQRLDSSAYSWGEAVQRPSDVTPVKLSK 1.2802416 92.67
DSSAYSWGEAVQRPSDVTPV 0.2560978 58.54		DSSAYSWGEAVQRPSDVTPV -0.043398614 48.55		QRLDSSAYSWGEAVQRPSDVTPVKL 0.69644234 73.21		TEQRLDSSAYSWGEAVQRPSDVTPVKLSKI 1.2725566 92.42		TEQRLDSSAYSWGEAVQRPSDVTPVKLSKI 1.1426855 88.09
SSAYSWGEAVQRPSDVTPVK 0.25155566 58.39		SSAYSWGEAVQRPSDVTPVK 0.047321801 51.58		RLDSSAYSWGEAVQRPSDVTPVKLS 0.55815865 68.61		EQRLDSSAYSWGEAVQRPSDVTPVKLSKIN 1.1898896 89.66		EQRLDSSAYSWGEAVQRPSDVTPVKLSKIN 1.0722108 85.74
SAYSWGEAVQRPSDVTPVKL 0.19744025 56.58		SAYSWGEAVQRPSDVTPVKL 0.12158545 54.05		LDSSAYSWGEAVQRPSDVTPVKLSK 0.85412177 78.47		QRLDSSAYSWGEAVQRPSDVTPVKLSKINX 1.1806631 89.36		QRLDSSAYSWGEAVQRPSDVTPVKLSKINX 1.0609265 85.36
AYSWGEAVQRPSDVTPVKLS 0.30913523 60.30		AYSWGEAVQRPSDVTPVKLS 0.13653031 54.55		DSSAYSWGEAVQRPSDVTPVKLSKI 0.85955741 78.65		RLDSSAYSWGEAVQRPSDVTPVKLSKINXX 1.1257198 87.52		RLDSSAYSWGEAVQRPSDVTPVKLSKINXX 1.2843713 92.81
YSWGEAVQRPSDVTPVKLSK 0.51880494 67.29		YSWGEAVQRPSDVTPVKLSK 0.35747937 61.92		SSAYSWGEAVQRPSDVTPVKLSKIN 0.7678491 75.59		LDSSAYSWGEAVQRPSDVTPVKLSKINXXX 1.075949 85.86		LDSSAYSWGEAVQRPSDVTPVKLSKINXXX 1.3417844 94.73
SWGEAVQRPSDVTPVKLSKI 0.39642861 63.21		SWGEAVQRPSDVTPVKLSKI 0.34114306 61.37		SAYSWGEAVQRPSDVTPVKLSKINX 0.73094265 74.36		DSSAYSWGEAVQRPSDVTPVKLSKINXXXX 0.86833623 78.94		DSSAYSWGEAVQRPSDVTPVKLSKINXXXX 1.3963014 96.54
WGEAVQRPSDVTPVKLSKIN 0.21512967 57.17		WGEAVQRPSDVTPVKLSKIN 0.088952367 52.97		AYSWGEAVQRPSDVTPVKLSKINXX 0.65983105 71.99		SSAYSWGEAVQRPSDVTPVKLSKINXXXXX 0.64255215 71.42		SSAYSWGEAVQRPSDVTPVKLSKINXXXXX 1.3948794 96.50
GEAVQRPSDVTPVKLSKINX 0.40192575 63.40		GEAVQRPSDVTPVKLSKINX 0.34673365 61.56		YSWGEAVQRPSDVTPVKLSKINXXX 0.44650696 64.88		SAYSWGEAVQRPSDVTPVKLSKINXXXXXX 0.38917161 62.97		SAYSWGEAVQRPSDVTPVKLSKINXXXXXX 1.3370539 94.57
EAVQRPSDVTPVKLSKINXX 0.21227568 57.08		EAVQRPSDVTPVKLSKINXX -0.099071152 46.70		SWGEAVQRPSDVTPVKLSKINXXXX 0.20051965 56.68		AYSWGEAVQRPSDVTPVKLSKINXXXXXXX 0.27417022 59.14		AYSWGEAVQRPSDVTPVKLSKINXXXXXXX 1.245823 91.53
AVQRPSDVTPVKLSKINXXX 0.44788166 64.93		AVQRPSDVTPVKLSKINXXX 0.030614187 51.02		WGEAVQRPSDVTPVKLSKINXXXXX 0.11999948 54.00		YSWGEAVQRPSDVTPVKLSKINXXXXXXXX 0.058505845 51.95		YSWGEAVQRPSDVTPVKLSKINXXXXXXXX 1.0220854 84.07
VQRPSDVTPVKLSKINXXXX 0.41724184 63.91		VQRPSDVTPVKLSKINXXXX 0.13322606 54.44		GEAVQRPSDVTPVKLSKINXXXXXX 0.040414969 51.35		SWGEAVQRPSDVTPVKLSKINXXXXXXXXX -0.12740496 45.75		SWGEAVQRPSDVTPVKLSKINXXXXXXXXX 0.81637483 77.21
QRPSDVTPVKLSKINXXXXX 0.56380521 68.79		QRPSDVTPVKLSKINXXXXX 0.3789517 62.63		EAVQRPSDVTPVKLSKINXXXXXXX -0.14878152 45.04		WGEAVQRPSDVTPVKLSKINXXXXXXXXXX -0.23616423 42.13		WGEAVQRPSDVTPVKLSKINXXXXXXXXXX 0.59820491 69.94
RPSDVTPVKLSKINXXXXXX 0.55105151 68.37		RPSDVTPVKLSKINXXXXXX 0.55570222 68.52		AVQRPSDVTPVKLSKINXXXXXXXX -0.093353183 46.89		GEAVQRPSDVTPVKLSKINXXXXXXXXXXX -0.33262794 38.91		GEAVQRPSDVTPVKLSKINXXXXXXXXXXX 0.42867649 64.29
PSDVTPVKLSKINXXXXXXX 0.46917162 65.64		PSDVTPVKLSKINXXXXXXX 0.53125158 67.71		VQRPSDVTPVKLSKINXXXXXXXXX -0.13999807 45.33		EAVQRPSDVTPVKLSKINXXXXXXXXXXXX -0.4822835 33.92		EAVQRPSDVTPVKLSKINXXXXXXXXXXXX 0.26552179 58.85
SDVTPVKLSKINXXXXXXXX 0.45178639 65.06		SDVTPVKLSKINXXXXXXXX 0.59704825 69.90		QRPSDVTPVKLSKINXXXXXXXXXX -0.10468139 46.51		AVQRPSDVTPVKLSKINXXXXXXXXXXXXX -0.49387981 33.54		AVQRPSDVTPVKLSKINXXXXXXXXXXXXX 0.077420909 52.58
DVTPVKLSKINXXXXXXXXX 0.43196421 64.40		DVTPVKLSKINXXXXXXXXX 0.5096019 66.99		RPSDVTPVKLSKINXXXXXXXXXXX -0.12488159 45.84		VQRPSDVTPVKLSKINXXXXXXXXXXXXXX -0.53059347 32.31		VQRPSDVTPVKLSKINXXXXXXXXXXXXXX -0.088709086 47.04
				PSDVTPVKLSKINXXXXXXXXXXXX -0.18680315 43.77		PVKLSKINXXXXXXX -0.66812589 27.73

## Sheet: CBTOPE
CBTOPE:: Prediction of Conformational B-cell epitopes
Threshold Selected: -.1
probability scale (0-9) for each amino acid [Above 4 scale can be considered as epitope residue]
	MQLHYKMQST SPKYNYKRML CMVFVPVILS SFFAEDALAS NSTLFAFHRE PTNRRLTRRA
	4444444444 4444444443 3333333333 2333333333 3334433444 4444444444
										CBTOPE
	SRGQLLNSRR GSDDTSESSD RYSGRSGGSK NSGQSPWIKY MQKFDIPRNH GSGIYVDLGG									Position	Epitope sequence	Probability scale
	4333333344 4444433333 3333333444 3444443333 3333332333 3333333333								E1	152-171	LDPISSEDPSYRGLAFPETA	4.05263	5	6	4	6	4	4	5	4	4	4	3	3	2	3	4	4	4	3	5
									E2	198-220	SAKDLRRWGYEGNDVANCSEYASN	4.54167	4	5	5	6	6	6	5	5	6	5	4	5	5	4	4	4	4	3	4	3	4	4	4	4
	YESVGSKSYR MPVGKCPVVG KIIDLGNGAD FLDPISSEDP SYRGLAFPET AVDSNIPTQP								E3	293-309	KVDPDWEENCPMHPVRD	4.58824	4	5	6	6	5	5	4	4	4	4	4	4	5	4	5	5	4
	3334434433 3333333433 3222332333 3456464454 4433234443 5333333333								E4	335-342	EDCAAILF	4.25	4	4	5	5	4	4	4	4
									E5	387-415	VAGTSRISRGVGMNWATYDKDSGMCALIN	4.41379	4	4	5	4	4	5	4	4	4	4	5	5	4	5	4	4	4	4	3	5	4	4	6	6	5	5	5	4	4
	KTRGSSSVTA AKLSPVSAKD LRRWGYEGND VANCSEYASN LIPASDKTTK YRYPFVFDSD								E6	442-462	VNYPCHIDTNGYVEPRAKTTN	4.28571	5	5	5	5	4	4	5	4	4	5	4	4	4	4	4	4	4	4	4	4	4
	3443433343 4443334556 6655654554 4443434444 3433332232 3333444544								E7	484-502	AYVHTKYSDSCGTYFLCSD	4.5	4	4	4	5	5	4	5	5	4	5	4	4	4	5	5	5	5	5	4	4
	NQMCYILYSA IQYNQGSRYC DNDGSSEEGT SSLLCMKPYK SAEDAHLYYG SAKVDPDWEE								Note: Highlitlight with yellow is the PAN motif of BbAMA-1 domain I (residue 147-305)
	3333333333 3443443444 4444333444 4333334444 4443333333 3345665544
	NCPMHPVRDA IFGKWSGGSC VAIAPAFQEY ANSTEDCAAI LFDNSATDLD IDVVNEEFNE
	4444545543 4333223333 3333333344 3333445544 4433333323 3333333332
	LKELTSGLKR LNLSKVANAI FSPLSNVAGT SRISRGVGMN WATYDKDSGM CALINETPNC
	3233332222 1223333333 3443334454 4544445545 4444354466 5554433333
	LILNAGSIAL TAIGSPLEYD AVNYPCHIDT NGYVEPRAKT TNKYLDVPFE VTTALSMKTL
	3333223333 3322222323 3555544544 5444444444 4433332222 3332222233
	KCNAYVHTKY SDSCGTYFLC SDVKPNWFIR FLHMIGLYNT KRIVIFVCCT TTAIVLTIWI
	3344455455 4544455555 4433332222 3333443443 3333333333 3333333333
	WKRFIKAKKE PAPPSFDKYL SNYDYDTTLD ADNETEQRLD SSAYSWGEAV QRPSDVTPVK
	3333333344 4333334444 4433333444 3334444443 3333332122 3323334444
	LSKIN
	44343
			5	4	4	4	4	5	4
			6	5	5	4	4	5	4
			4	5	6	5	5	5	4
			6	6	6	5	4	5	5
			4	6	5	4	4	4	5
			4	6	5	4	5	4	4
			5	5	4	4	4	5	5
			4	5	4	4	4	4	5
			4	6	4		4	4	4
			4	5	4		4	5	5
			3	4	4		5	4	4
			3	5	4		5	4	4
			2	5	5		4	4	4
			3	4	4		5	4	5
			4	4	5		4	4	5
			4	4	5		4	4	5
			4	4	4		4	4	5
			3	3			4	4	5
			5	4			3	4	4
				3			5	4	4
				4			4	4
				4			4
				4			6
				4			6
							5
							5
							5
							4
							4
			4.05263	4.54167	4.58824	4.25	4.41379	4.28571	4.5

## Sheet: Epitope analysis
An epitope analysis
Note: Highlitlight with yellow is the epitopes located on the PAN motif of BbAMA-1 domain I (residue 147-305)
Bbipred2				ABCpred				LBtope				CBTOPE
Position	Epitope sequence	Mean score		Position	Epitope sequence	Score		Position	Epitope sequence	Percent Probabilty of correct prediction		Position	Epitope sequence	Probability scale
4-61	HYKMQSTSPKYNY	0.612		5-24	YKMQSTSPKYNYKRMLCMVF	0.8		182-201	TRGSSSVTAAKLSPVSAKDL	86.65		152-171	LDPISSEDPSYRGLAFPETA	4.05263
38-112	LASNSTLFAFHREPTNRRLTRRASRGQLLNSRRGSDDTSESSDRYSGRSGGSKNSGQSPWIKYMQKFDIPRNHGS	0.616		76-95	SESSDRYSGRSGGSKNSGQS	0.81		180-200	KTRGSSSVTAAKLSPVSAKD	83.86		198-220	SAKDLRRWGYEGNDVANCSEYASN	4.54167
119-132	GGYESVGSKSYRMP	0.543		86-105	SGGSKNSGQSPWIKYMQKFD	0.84		190-214	AAKLSPVSAKDLRRWGYEGNDVANC	99.02		293-309	KVDPDWEENCPMHPVRD	4.58824
150-213	DFLDPISSEDPSYRGLAFPETAVDSNIPTQPKTRGSSSVTAAKLSPVSAKDLRRWGYEGNDVAN	0.586		103-122	KFDIPRNHGSGIYVDLGGYE	0.87		186-215	SSVTAAKLSPVSAKDLRRWGYEGNDVANCS	97.62		335-342	EDCAAILF	4.25
224-231	ASDKTTKY	0.533		110-129	HGSGIYVDLGGYESVGSKSY	0.83		179-208	QPKTRGSSSVTAAKLSPVSAKDLRRWGYEG	92.49		387-415	VAGTSRISRGVGMNWATYDKDSGMCALIN	4.41379
253-270	YNQGSRYCDNDGSSEEGT	0.606		124-143	VGSKSYRMPVGKCPVVGKII	0.92						442-462	VNYPCHIDTNGYVEPRAKTTN	4.28571
280-284	KSAED	0.53		135-154	KCPVVGKIIDLGNGADFLDP	0.9		** All epitopes are located in the PAN motif of BbAMA-1 domain I (residue 147-305)				484-502	AYVHTKYSDSCGTYFLCSD	4.5
295-308	DPDWEENCPMHPVR	0.531		145-164	LGNGADFLDPISSEDPSYRG	0.89		** An epitpe with highest percent probability of correct prediction which located on the PAN domain was selected
318-333	GSCVAIAPAFQEYANS	0.53		166-185	AFPETAVDSNIPTQPKTRGS	0.81
343-373	DNSATDLDIDVVNEEFNELKELTSGLKRLNL	0.573		178-197	TQPKTRGSSSVTAAKLSPVS	0.83
381-409	FSPLSNVAGTSRISRGVGMNWATYDKDSG	0.593		197-216	SAKDLRRWGYEGNDVANCSE	0.92
437-495	LEYDAVNYPCHIDTNGYVEPRAKTTNKYLDVPFEVTTALSMKTLKCNAYVHTKYSDSCG	0.538		208-227	GNDVANCSEYASNLIPASDK	0.8
504-518	KPNWFIRFLHMIGLY	0.542		215-234	SEYASNLIPASDKTTKYRYP	0.82
547-600	AKKEPAPPSFDKYLSNYDYDTTLDADNETEQRLDSSAYSWGEAVQRPSDVTPVK	0.591		228-247	TTKYRYPFVFDSDNQMCYIL	0.84
				280-299	KSAEDAHLYYGSAKVDPDWE	0.88
				304-319	MHPVRDAIFGKWSGGSCVAI	0.92
				358-377	FNELKELTSGLKRLNLSKVA	0.82
				365-384	TSGLKRLNLSKVANAIFSPL	0.86
				374-393	SKVANAIFSPLSNVAGTSRI	0.88
				399-418	MNWATYDKDSGMCALINETP	0.85
				479-498	TLKCNAYVHTKYSDSCGTYF	0.88
				526-545	FVCCTTTAIVLTIWIWKRFI	0.83
				547-566	AKKEPAPPSFDKYLSNYDYD	0.87
				555-574	SFDKYLSNYDYDTTLDADNE	0.81
