# Supplementary material for: Structural and immunological characterization of an epitope within the PAN motif of ectodomain I in Babesia bovis apical membrane antigen 1 for vaccine development
Source: PeerJ. 2021 Jul 16;9:e11765. doi: 10.7717/peerj.11765 (PMC8288113; doi:10.7717/peerj.11765)
Supplement: Supplemental Information 6 [file peerj-09-11765-s006.xlsx]

## Sheet: Data
Invasion inhibition assay 1
Time	Treatment	replicate 1	replicate 2	replicate 3	Average	SD	% invasion	% invasion inhibition
1h	1:05 (Anti-AMA-1)	0.55	0.53	0.54	0.54	0.01	54.1806	45.8194
	1:10 (Anti-AMA-1)	0.63	0.59	0.48	0.566667	0.0776745	56.8562	43.1438
	Negative serum	0.84	0.79	0.67	0.766667	0.0873689	76.9231	23.0769
	GIT medium Control	0.96	1.06	0.97	0.996667	0.0550757	100	0
2h	1:05 (Anti-AMA-1)	0.54	0.55	0.56	0.55	0.01	44.3548	55.6452
	1:10 (Anti-AMA-1)	0.68	0.66	0.68	0.673333	0.011547	54.3011	45.6989
	Negative serum	0.91	0.95	1.02	0.96	0.0556776	77.4194	22.5806
	GIT medium Control	1.11	1.34	1.27	1.24	0.117898	100	0
4h	1:05 (Anti-AMA-1)	0.56	0.58	0.59	0.576667	0.0152753	41.6867	58.3133
	1:10 (Anti-AMA-1)	0.75	0.73	0.75	0.743333	0.011547	53.7349	46.2651
	Negative serum	1.13	1.19	1.11	1.14333	0.0416333	82.6506	17.3494
	GIT medium Control	1.36	1.32	1.47	1.38333	0.0776745	100	0
Invasion inhibition assay 2
Time	Treatment	replicate 1	replicate 2	replicate 3	Average	SD	% invasion	% invasion inhibit
1h	1:05 (Anti-AMA-1)	0.63	0.6	0.64	0.623333	0.0208167	51.8006	48.1994
	1:10 (Anti-AMA-1)	0.72	0.72	0.65	0.696667	0.0404145	57.8947	42.1053
	Negative serum	0.84	0.91	0.85	0.866667	0.0378594	72.0222	27.9778
	GIT medium Control	1.21	1.17	1.23	1.20333	0.0305505	100	0
2h	1:05 (Anti-AMA-1)	0.69	0.64	0.68	0.67	0.0264575	46.3134	53.6866
	1:10 (Anti-AMA-1)	0.75	0.79	0.86	0.8	0.0556776	55.2995	44.7005
	Negative serum	1.09	1.14	1.07	1.1	0.0360555	76.0369	23.9631
	GIT medium Control	1.47	1.38	1.49	1.44667	0.0585947	100	0
4h	1:05 (Anti-AMA-1)	0.66	0.63	0.6	0.63	0.03	39.5397	60.4603
	1:10 (Anti-AMA-1)	0.83	0.86	0.75	0.813333	0.0568624	51.046	48.954
	Negative serum	1.3	1.33	1.27	1.3	0.03	81.59	18.41
	GIT medium Control	1.68	1.58	1.52	1.59333	0.080829	100	0

## Sheet: Analysis
Relative % of Invasion inhibition
Time	Treatment	Exp1	Exp2	Mean	P value	SD
1h	1:05 (Anti-AMA-1)	45.82	48.2	47.01	0.0366564	1.68291
	1:10 (Anti-AMA-1)	43.14	42.11	42.625	0.0795789	0.72832
	Negative serum	23.08	27.98	25.53		3.46482
	GIT medium Control	0	0	0		0
2h	1:05 (Anti-AMA-1)	55.65	53.69	54.67	0.00249636	1.38593
	1:10 (Anti-AMA-1)	45.7	44.7	45.2	0.00239648	0.707107
	Negative serum	22.58	23.96	23.27		0.975807
	GIT medium Control	0	0	0		0
4h	1:05 (Anti-AMA-1)	58.31	60.46	59.385	0.00419754	1.52028
	1:10 (Anti-AMA-1)	46.27	48.95	47.61	0.0133465	1.89505
	Negative serum	17.35	18.41	17.88		0.749533
	GIT medium Control	0	0	0		0
